# Supplementary material
Source: publisher figshare collection journal article supplement (https://acs.figshare.com/ndownloader/files/3605991)
Supplement: Supplementary file 1 [file 3605991]

# Supporting information for:

## A Rotamer Library to Enable Modeling and Design of Peptoid Foldamers

P. Douglas Renfrew,<sup>†,||</sup> Timothy W. Craven,<sup>†,||</sup> Glenn L. Butterfoss,<sup>‡</sup> Kent Kirshenbaum,<sup>¶</sup> and Richard Bonneau<sup>\*,†,§</sup>

*Center for Genomics and Systems Biology, Department of Biology, New York University, New York, NY 10003, Center for Genomics and Systems Biology, New York University Abu Dhabi, United Arab Emirates, Department of Chemistry, New York University, New York, NY 10003, and Courant Institute of Mathematical Sciences, Computer Science Department, New York University, New York, NY 10003*

E-mail: bonneau@nyu.edu

## Rotamer Library Coverage Plots for Individual Positions

Rotamer library coverage plots for KMC and QMS rotamers of each individual position of all ROSETTA compatible structures are shown in figures S16–S108.

---

\*To whom correspondence should be addressed

<sup>†</sup>NYU Biology

<sup>‡</sup>NYU Abu Dhabi

<sup>¶</sup>NYU Chemistry

<sup>§</sup>NYU Courant

<sup>||</sup>These authors contributed equally to this publication.

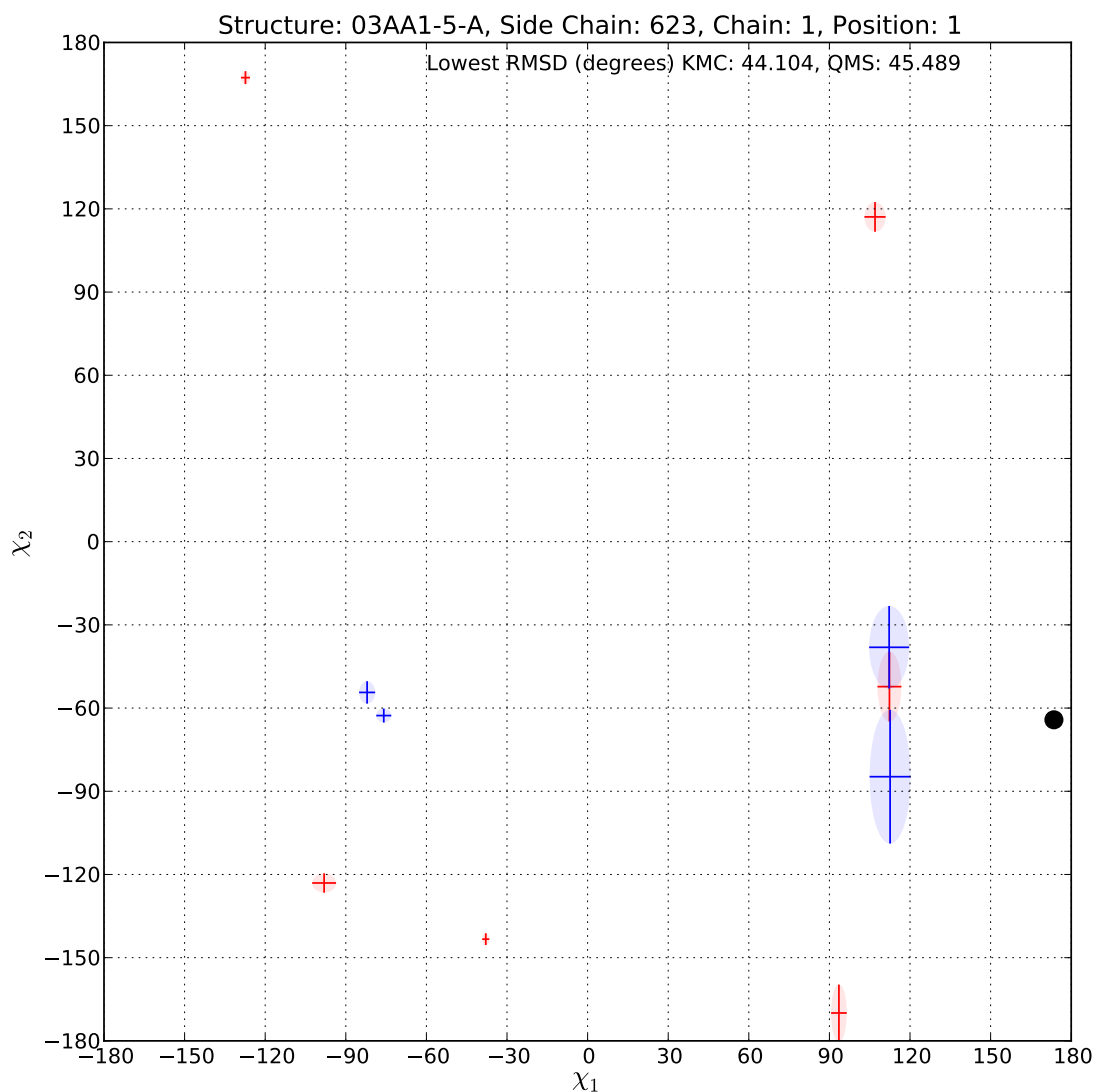

Figure S16: The rotamer library coverage plot for residue number 1 in chain 1 of peptoid databank structure 03AA1-5-A. Interpolated rotamers from the k-means clustering (KMC) method are shown as red ellipses and rotamers for the quantum mechanically-seeded (QMS) method are shown in blue. Experimental values shown as black circles.

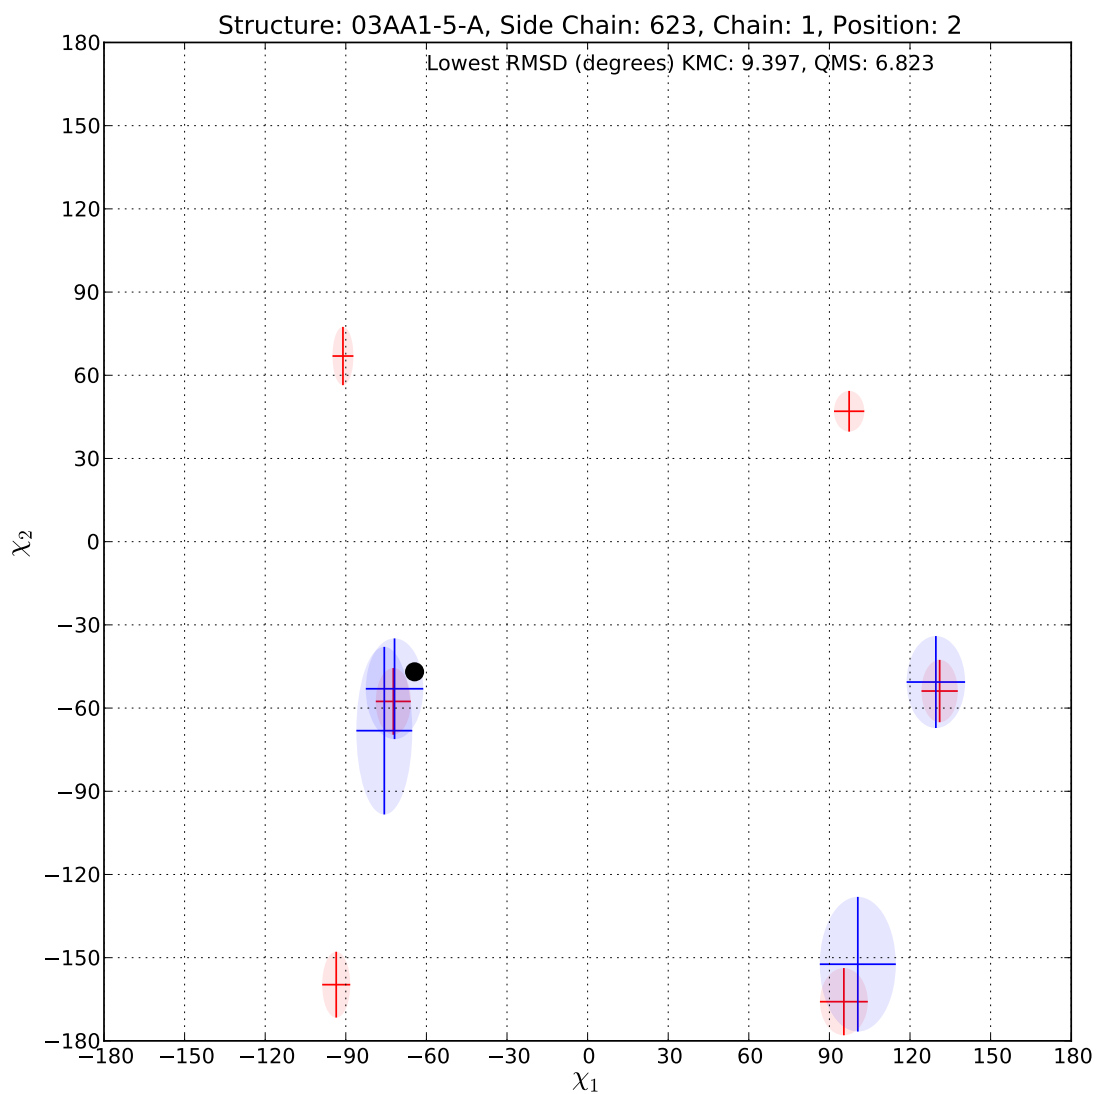

Figure S17: The rotamer library coverage plot for residue number 2 in chain 1 of peptoid databank structure 03AA1-5-A. Interpolated rotamers from the k-means clustering (KMC) method are shown as red ellipses and rotamers for the quantum mechanically-seeded (QMS) method are shown in blue. Experimental values shown as black circles.

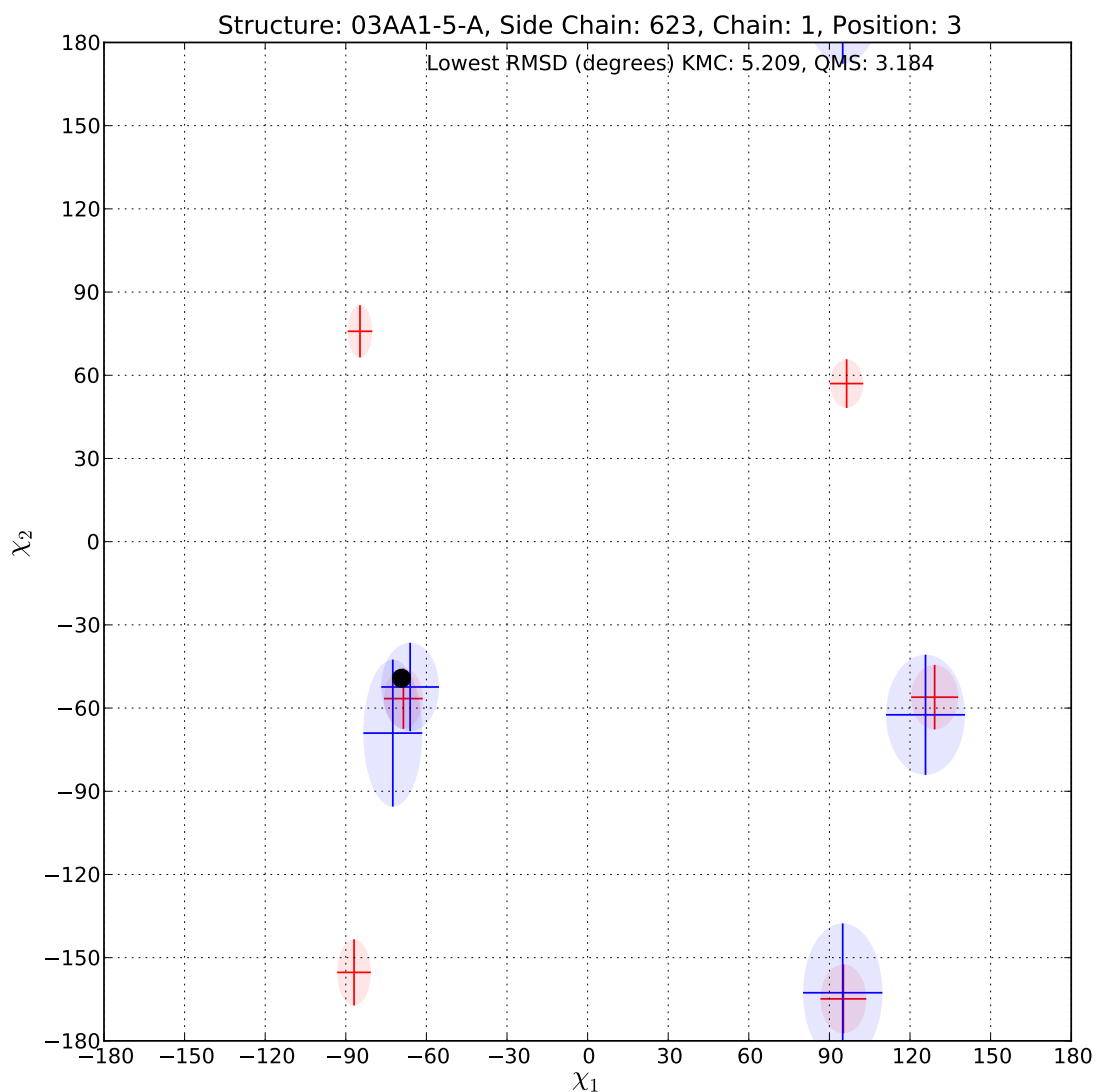

Figure S18: The rotamer library coverage plot for residue number 3 in chain 1 of peptoid databank structure 03AA1-5-A. Interpolated rotamers from the k-means clustering (KMC) method are shown as red ellipses and rotamers for the quantum mechanically-seeded (QMS) method are shown in blue. Experimental values shown as black circles.

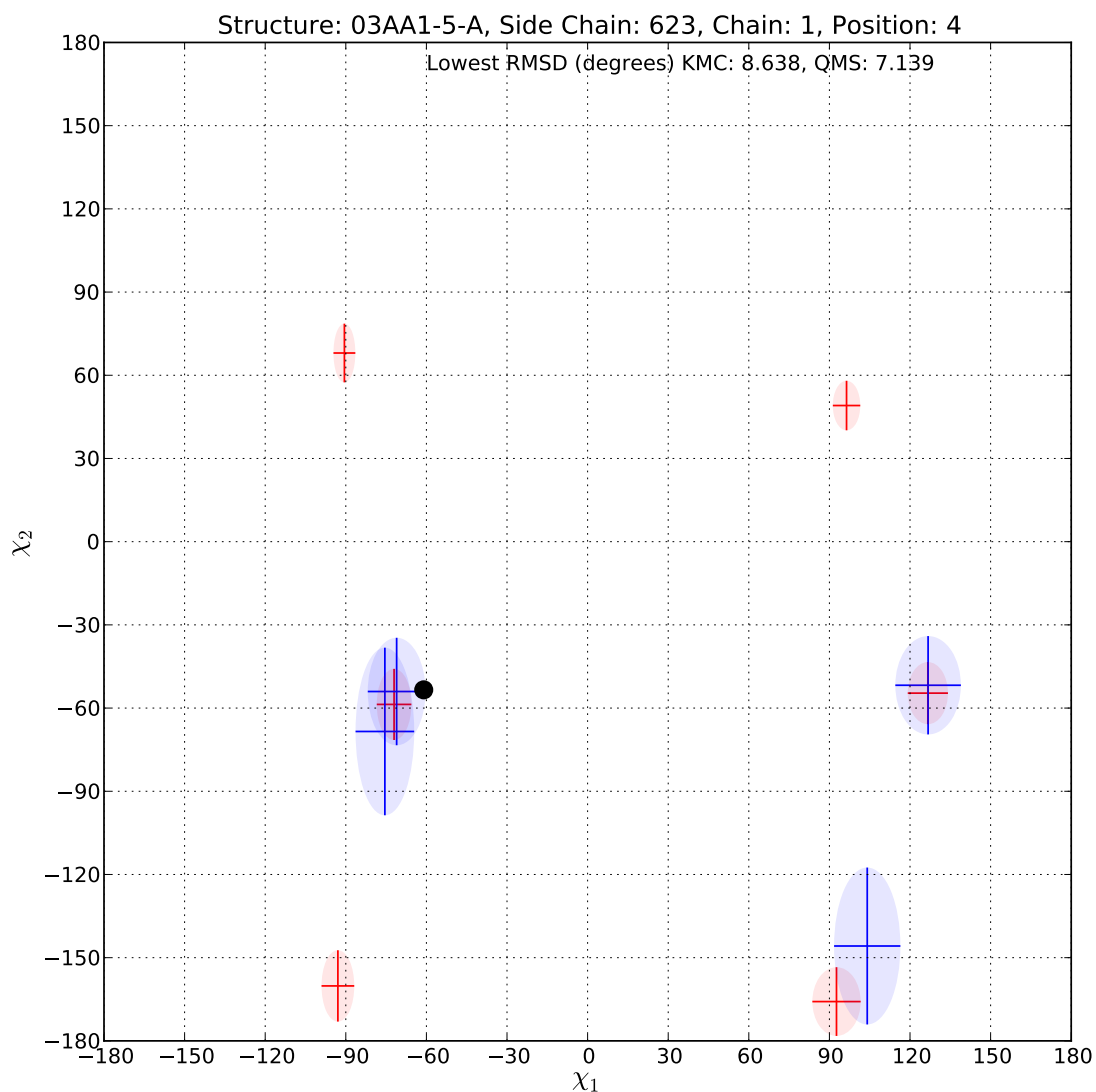

Figure S19: The rotamer library coverage plot for residue number 4 in chain 1 of peptoid databank structure 03AA1-5-A. Interpolated rotamers from the k-means clustering (KMC) method are shown as red ellipses and rotamers for the quantum mechanically-seeded (QMS) method are shown in blue. Experimental values shown as black circles.

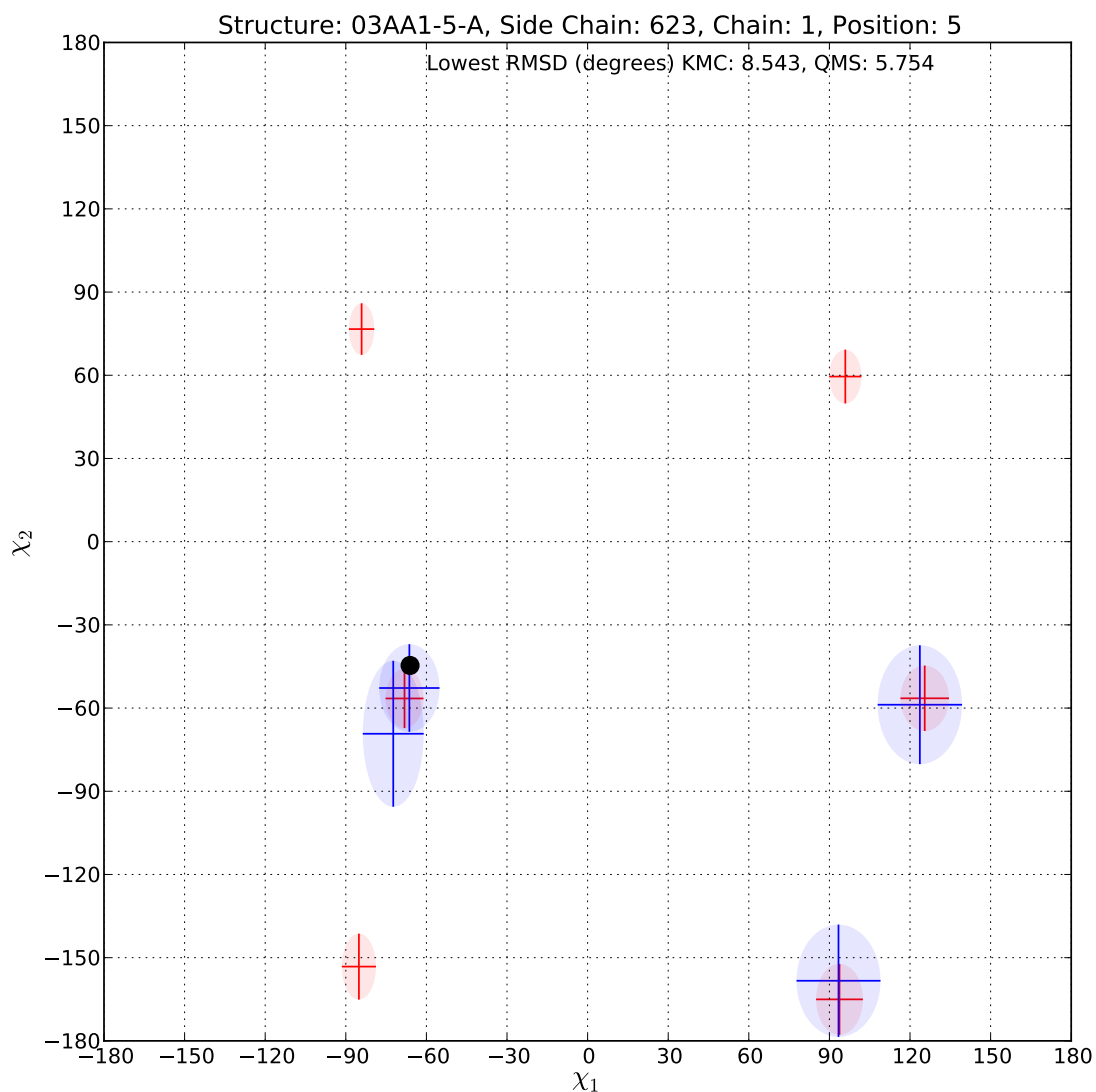

Figure S20: The rotamer library coverage plot for residue number 5 in chain 1 of peptoid databank structure 03AA1-5-A. Interpolated rotamers from the k-means clustering (KMC) method are shown as red ellipses and rotamers for the quantum mechanically-seeded (QMS) method are shown in blue. Experimental values shown as black circles.

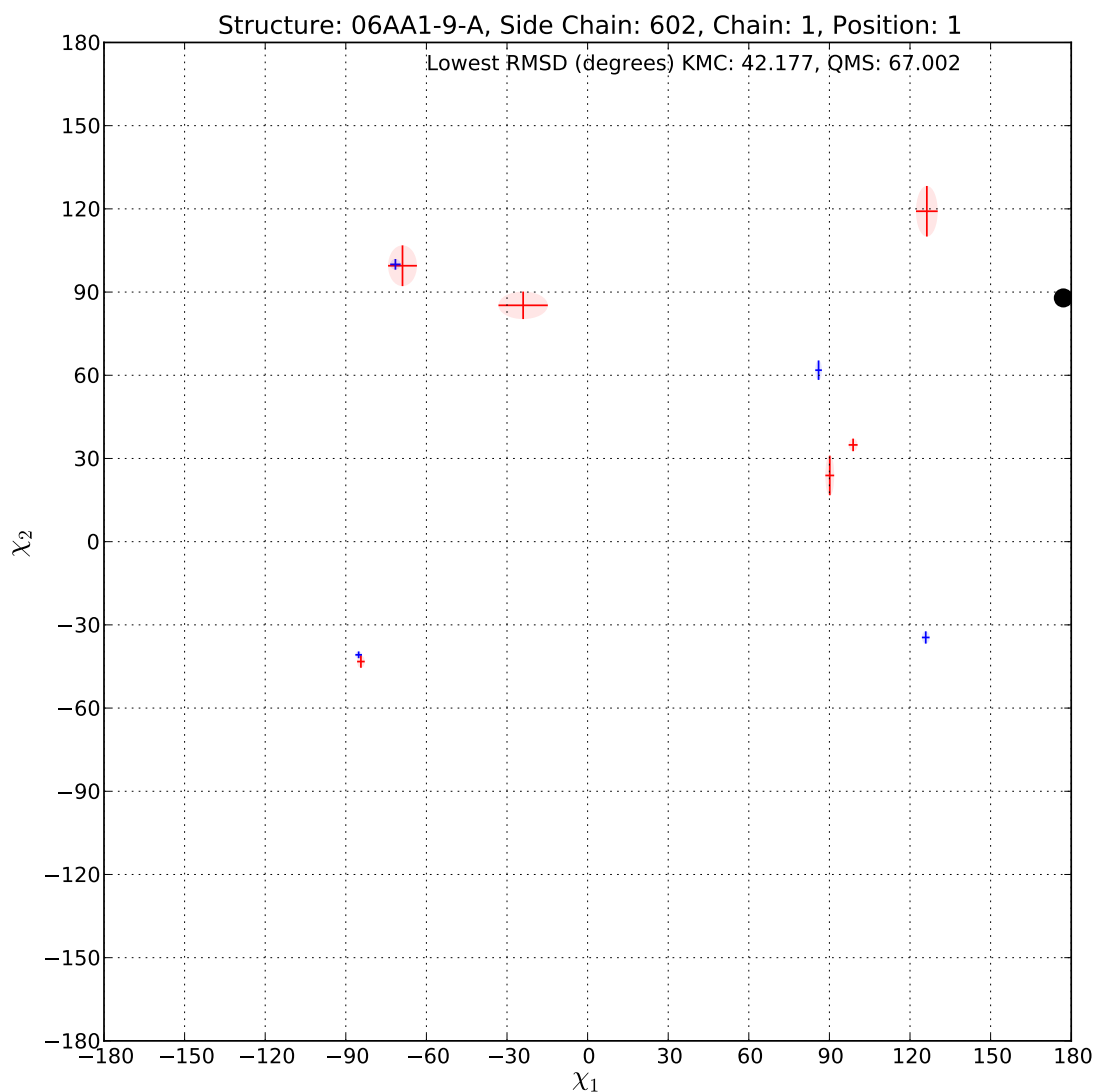

Figure S21: The rotamer library coverage plot for residue number 1 in chain 1 of peptoid databank structure 06AA1-9-A. Interpolated rotamers from the k-means clustering (KMC) method are shown as red ellipses and rotamers for the quantum mechanically-seeded (QMS) method are shown in blue. Experimental values shown as black circles.

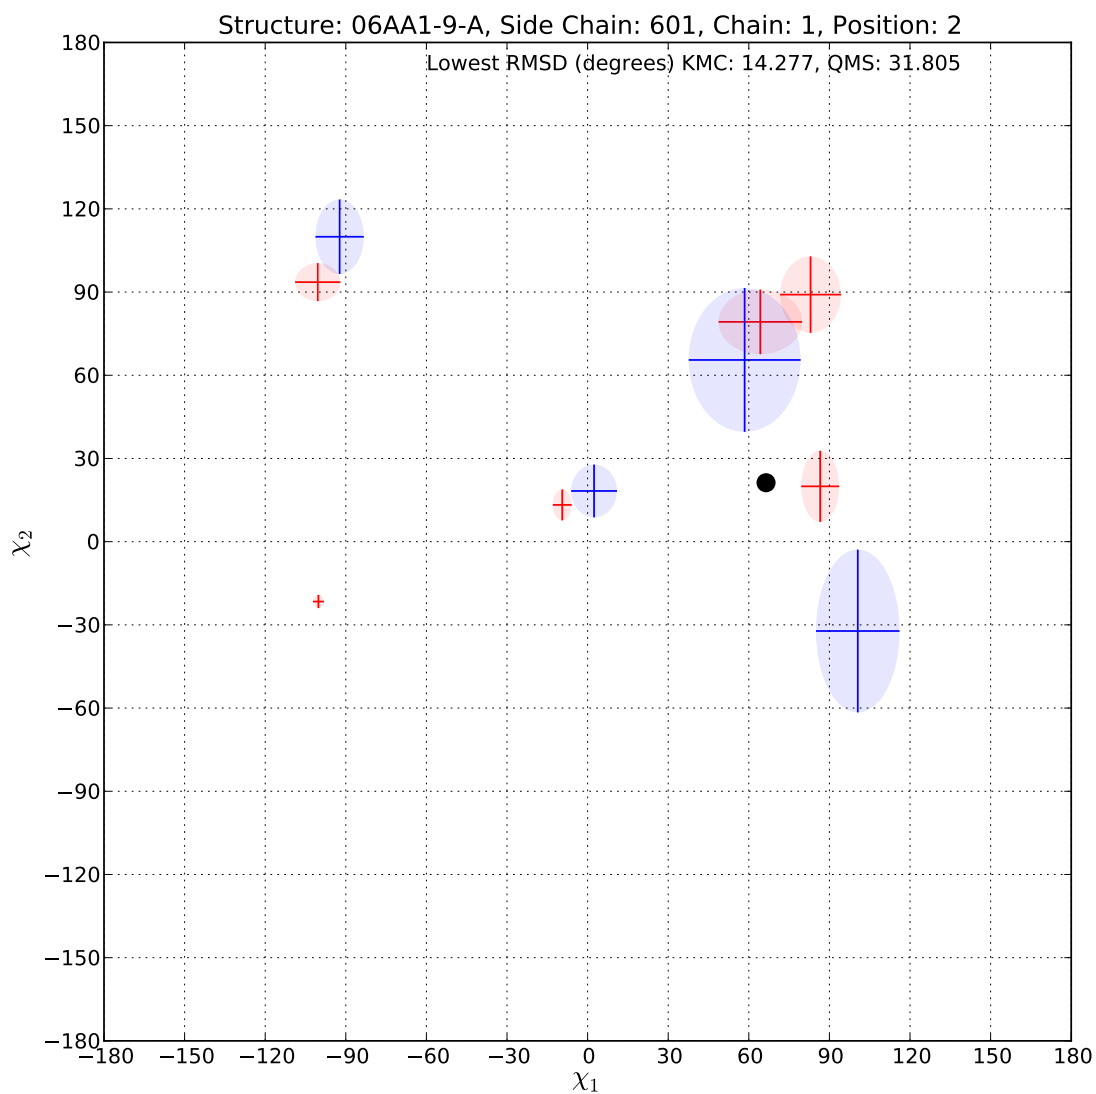

Figure S22: The rotamer library coverage plot for residue number 2 in chain 1 of peptoid databank structure 06AA1-9-A. Interpolated rotamers from the k-means clustering (KMC) method are shown as red ellipses and rotamers for the quantum mechanically-seeded (QMS) method are shown in blue. Experimental values shown as black circles.



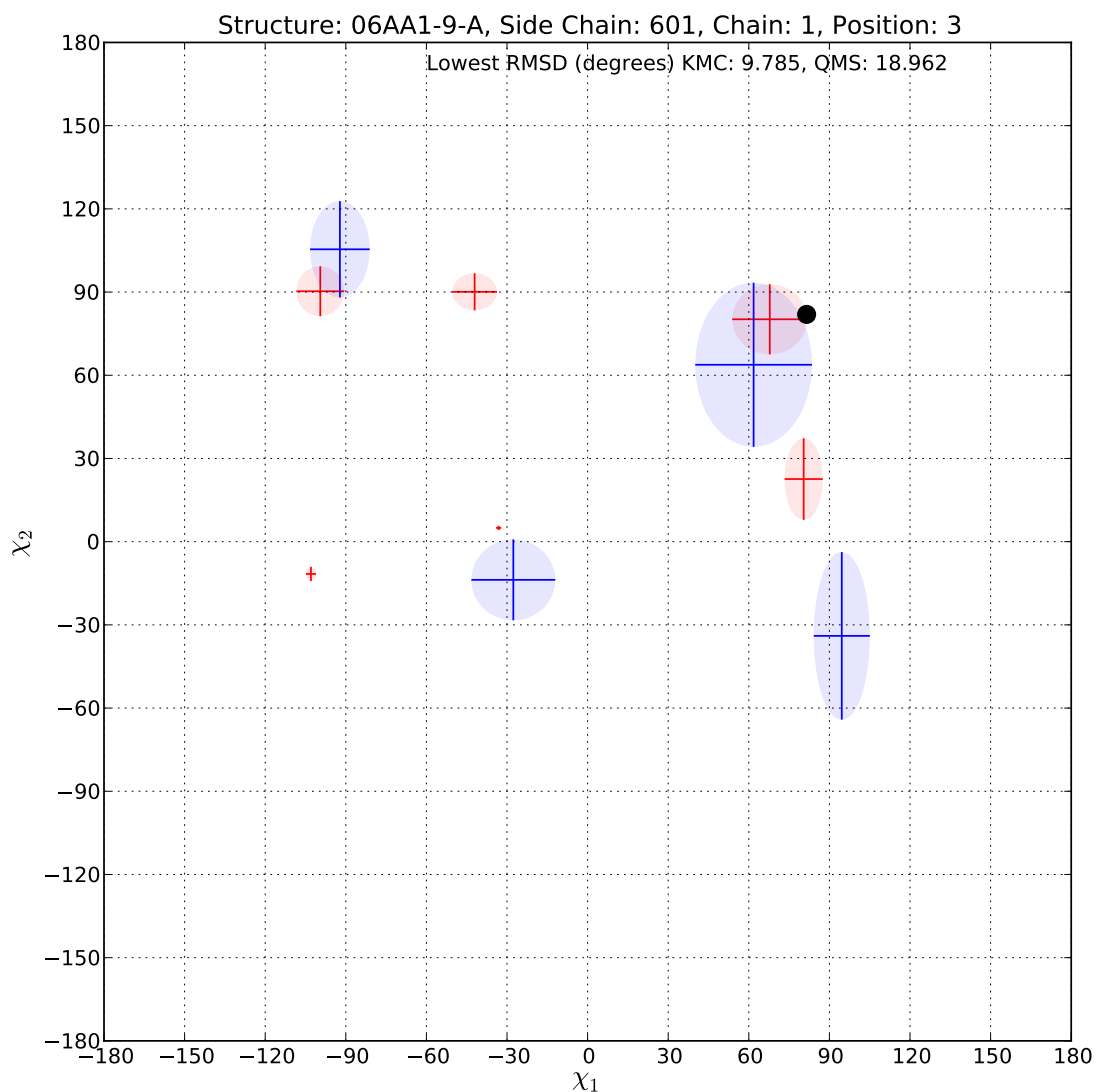

Figure S23: The rotamer library coverage plot for residue number 3 in chain 1 of peptoid databank structure 06AA1-9-A. Interpolated rotamers from the k-means clustering (KMC) method are shown as red ellipses and rotamers for the quantum mechanically-seeded (QMS) method are shown in blue. Experimental values shown as black circles.

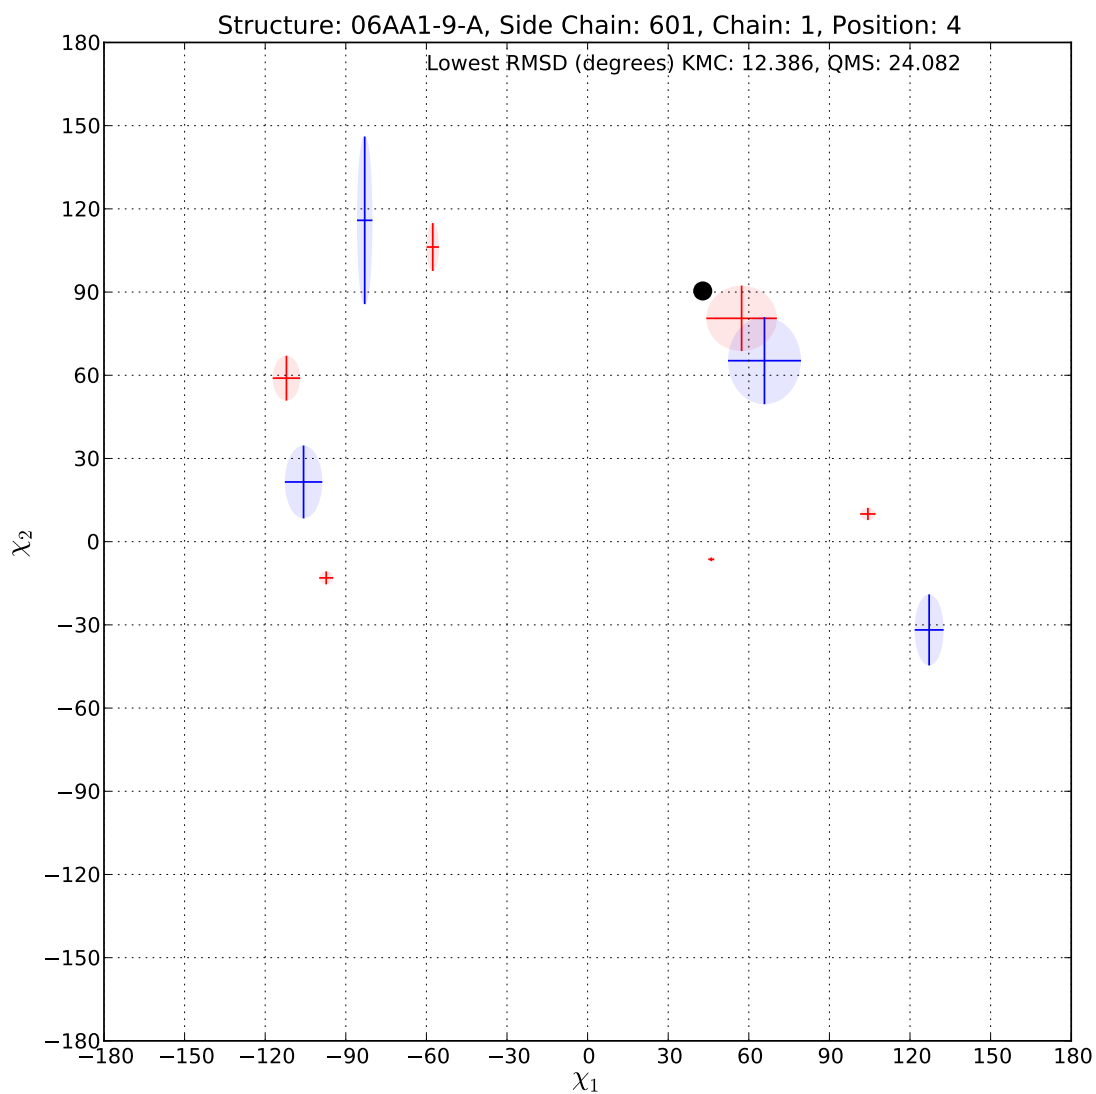

Figure S24: The rotamer library coverage plot for residue number 4 in chain 1 of peptoid databank structure 06AA1-9-A. Interpolated rotamers from the k-means clustering (KMC) method are shown as red ellipses and rotamers for the quantum mechanically-seeded (QMS) method are shown in blue. Experimental values shown as black circles.

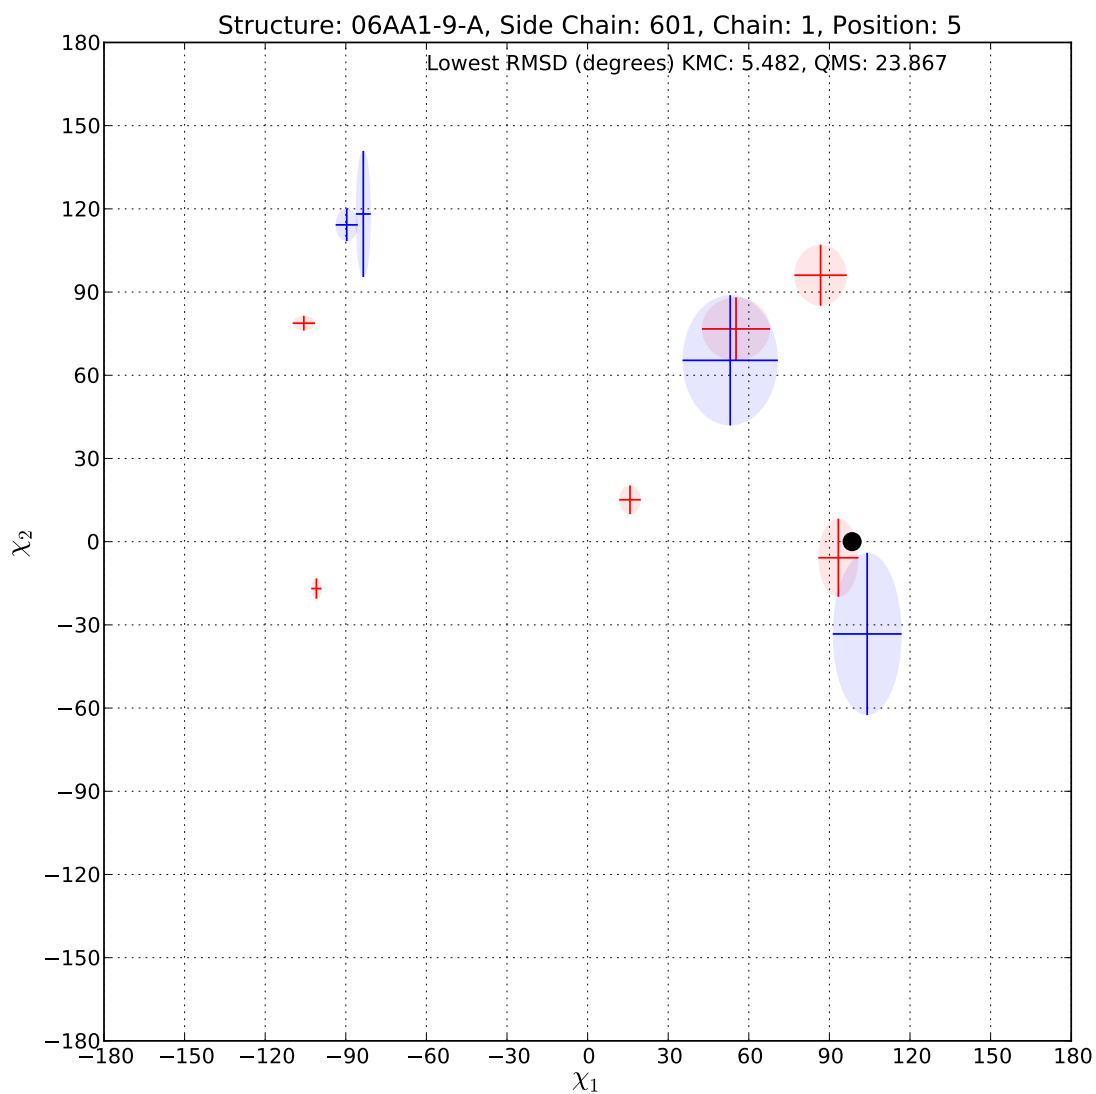

Figure S25: The rotamer library coverage plot for residue number 5 in chain 1 of peptoid databank structure 06AA1-9-A. Interpolated rotamers from the k-means clustering (KMC) method are shown as red ellipses and rotamers for the quantum mechanically-seeded (QMS) method are shown in blue. Experimental values shown as black circles.

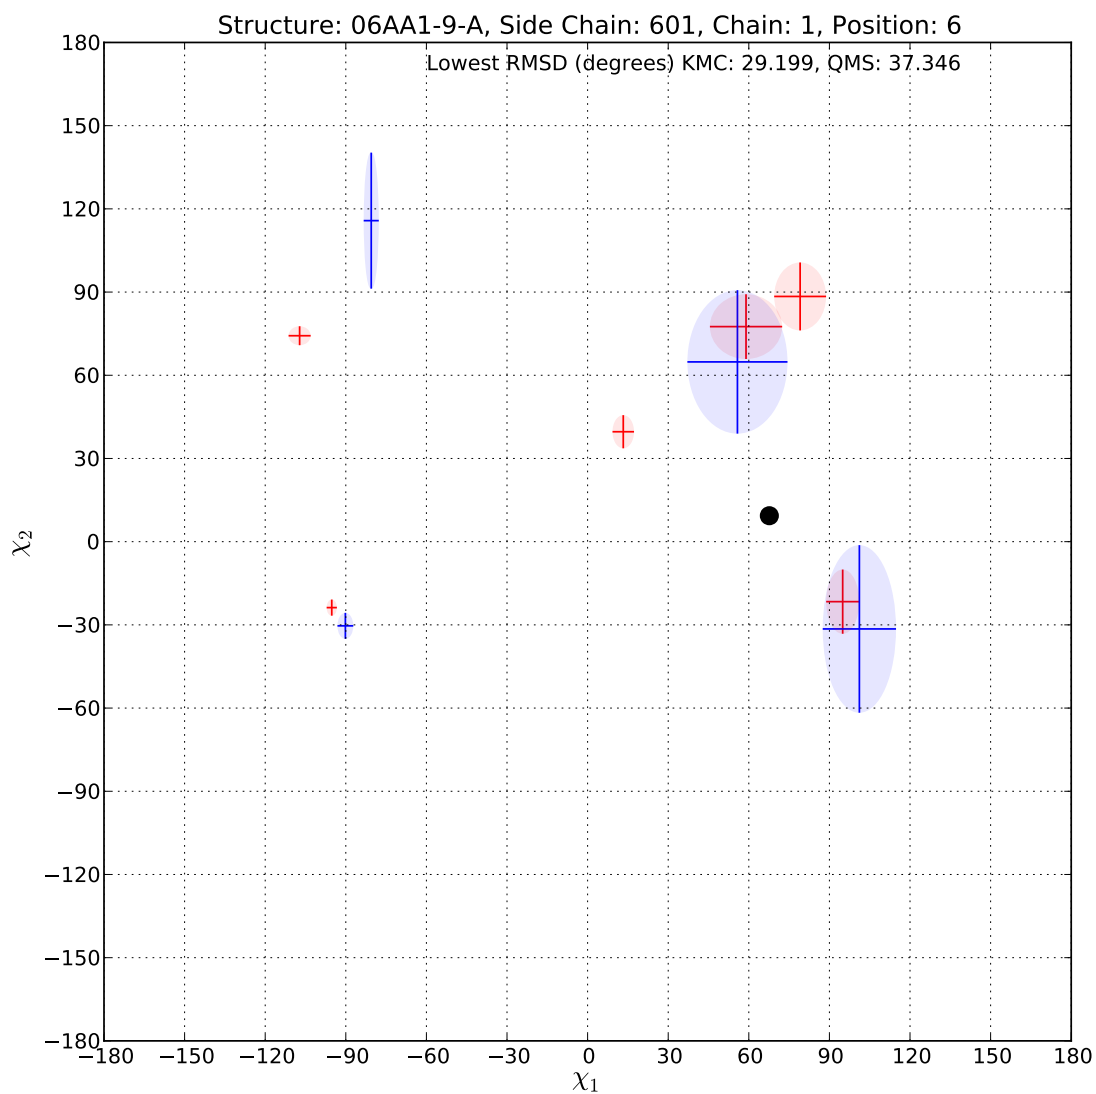

Figure S26: The rotamer library coverage plot for residue number 6 in chain 1 of peptoid databank structure 06AA1-9-A. Interpolated rotamers from the k-means clustering (KMC) method are shown as red ellipses and rotamers for the quantum mechanically-seeded (QMS) method are shown in blue. Experimental values shown as black circles.

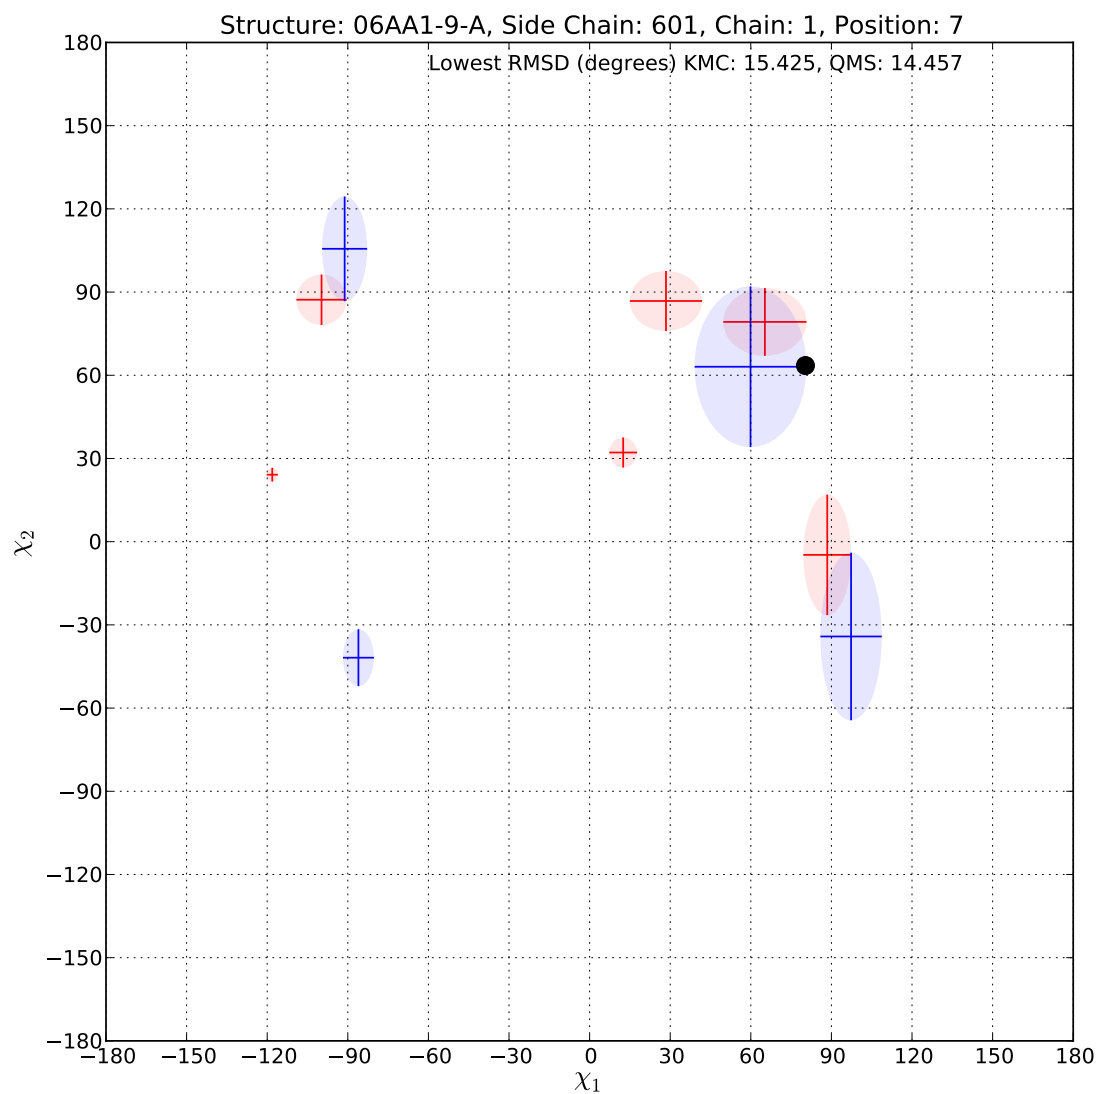

Figure S27: The rotamer library coverage plot for residue number 7 in chain 1 of peptoid databank structure 06AA1-9-A. Interpolated rotamers from the k-means clustering (KMC) method are shown as red ellipses and rotamers for the quantum mechanically-seeded (QMS) method are shown in blue. Experimental values shown as black circles.

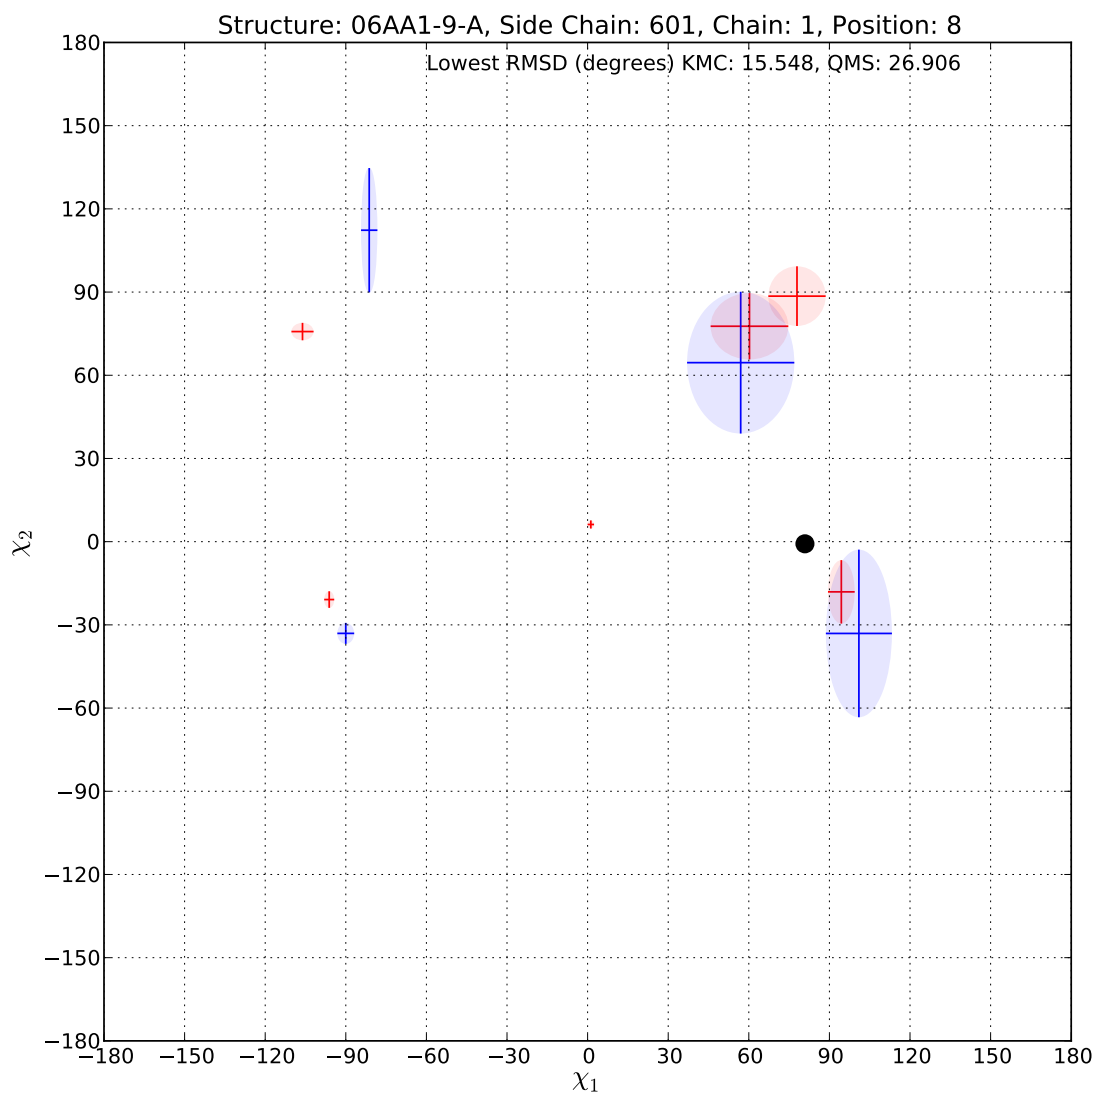

Figure S28: The rotamer library coverage plot for residue number 8 in chain 1 of peptoid databank structure 06AA1-9-A. Interpolated rotamers from the k-means clustering (KMC) method are shown as red ellipses and rotamers for the quantum mechanically-seeded (QMS) method are shown in blue. Experimental values shown as black circles.

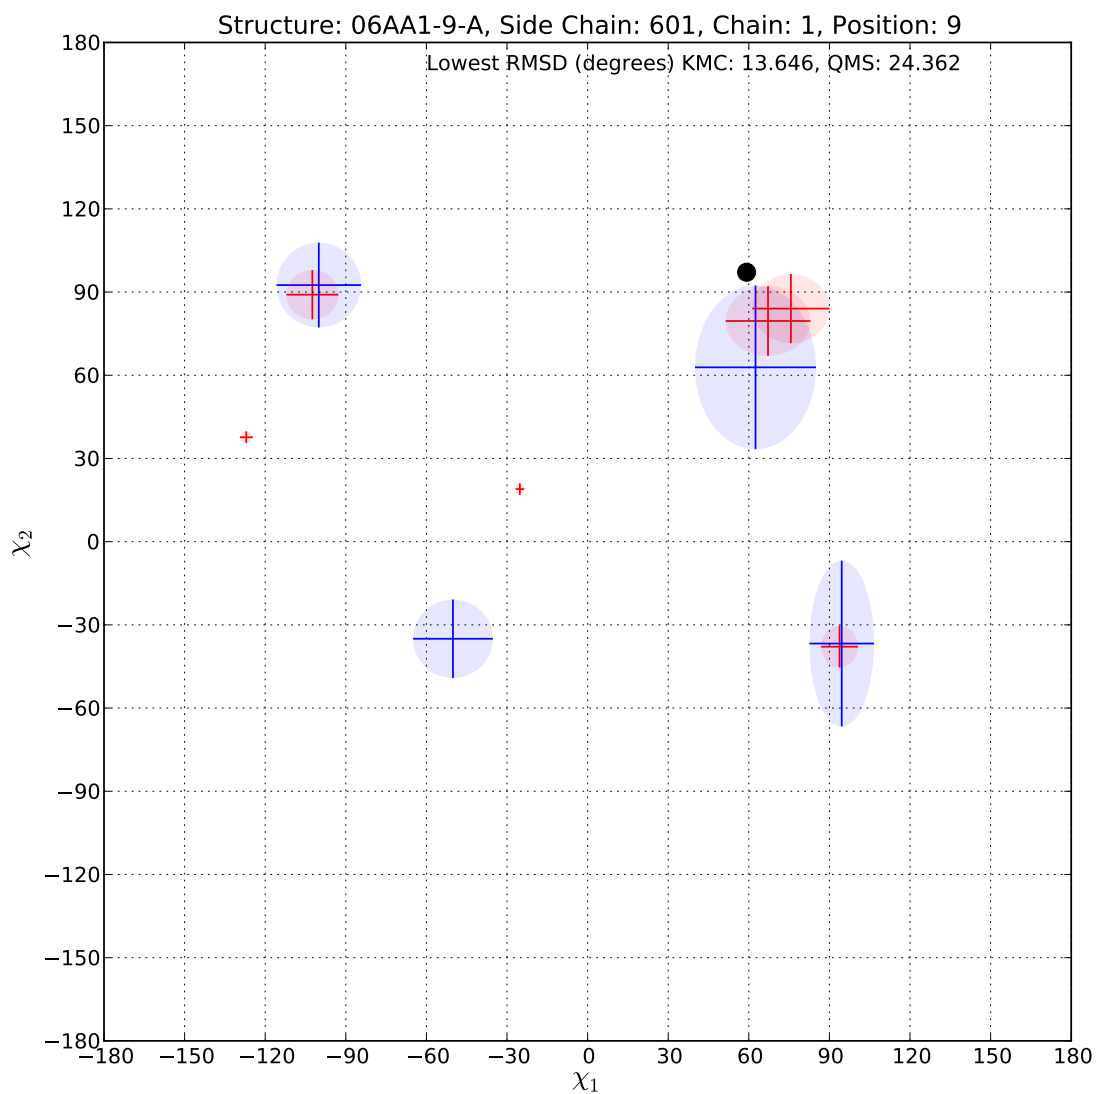

Figure S29: The rotamer library coverage plot for residue number 9 in chain 1 of peptoid databank structure 06AA1-9-A. Interpolated rotamers from the k-means clustering (KMC) method are shown as red ellipses and rotamers for the quantum mechanically-seeded (QMS) method are shown in blue. Experimental values shown as black circles.

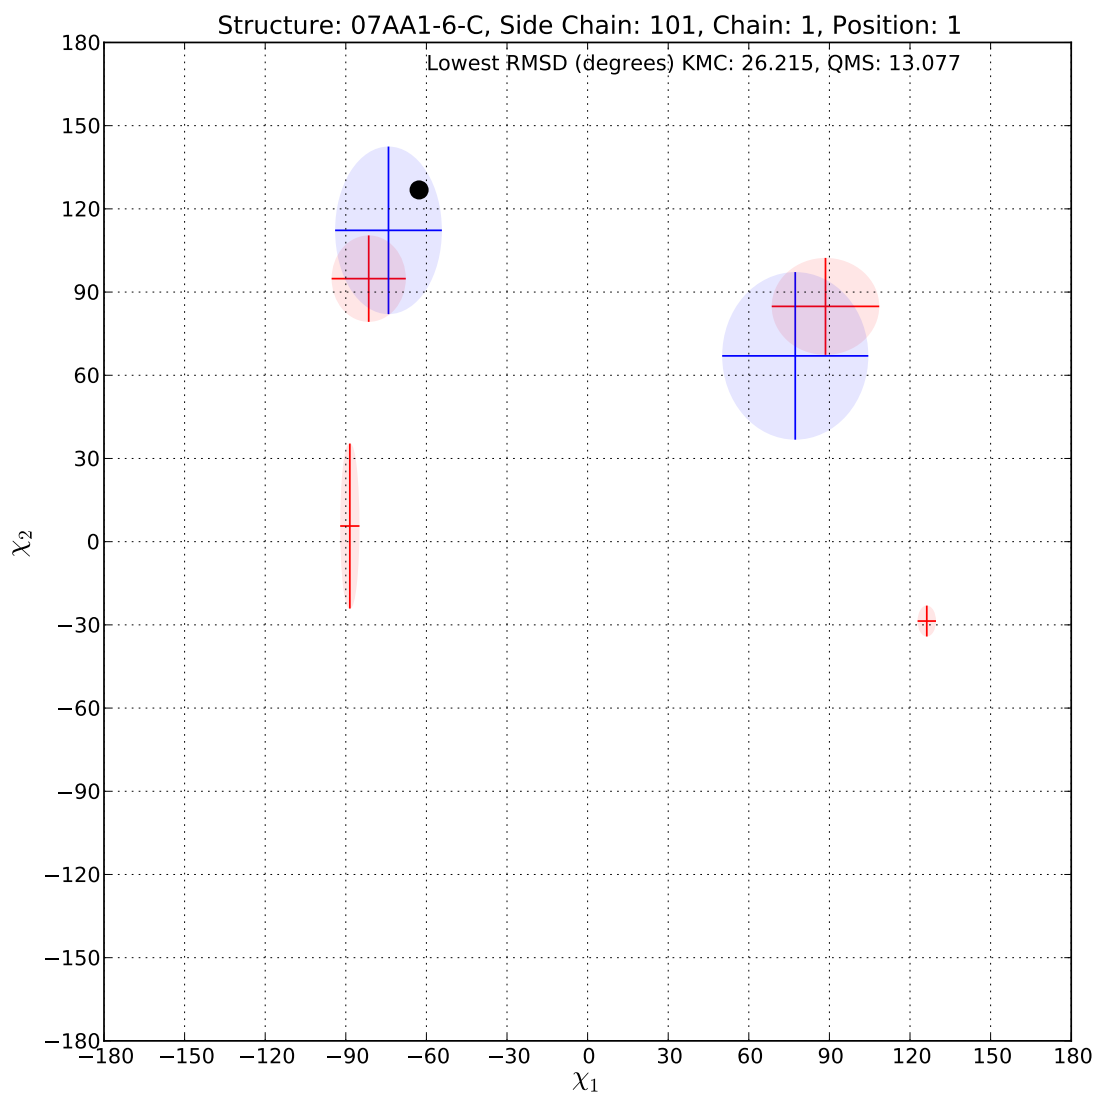

Figure S30: The rotamer library coverage plot for residue number 1 in chain 1 of peptoid databank structure 07AA1-6-C. Interpolated rotamers from the k-means clustering (KMC) method are shown as red ellipses and rotamers for the quantum mechanically-seeded (QMS) method are shown in blue. Experimental values shown as black circles.



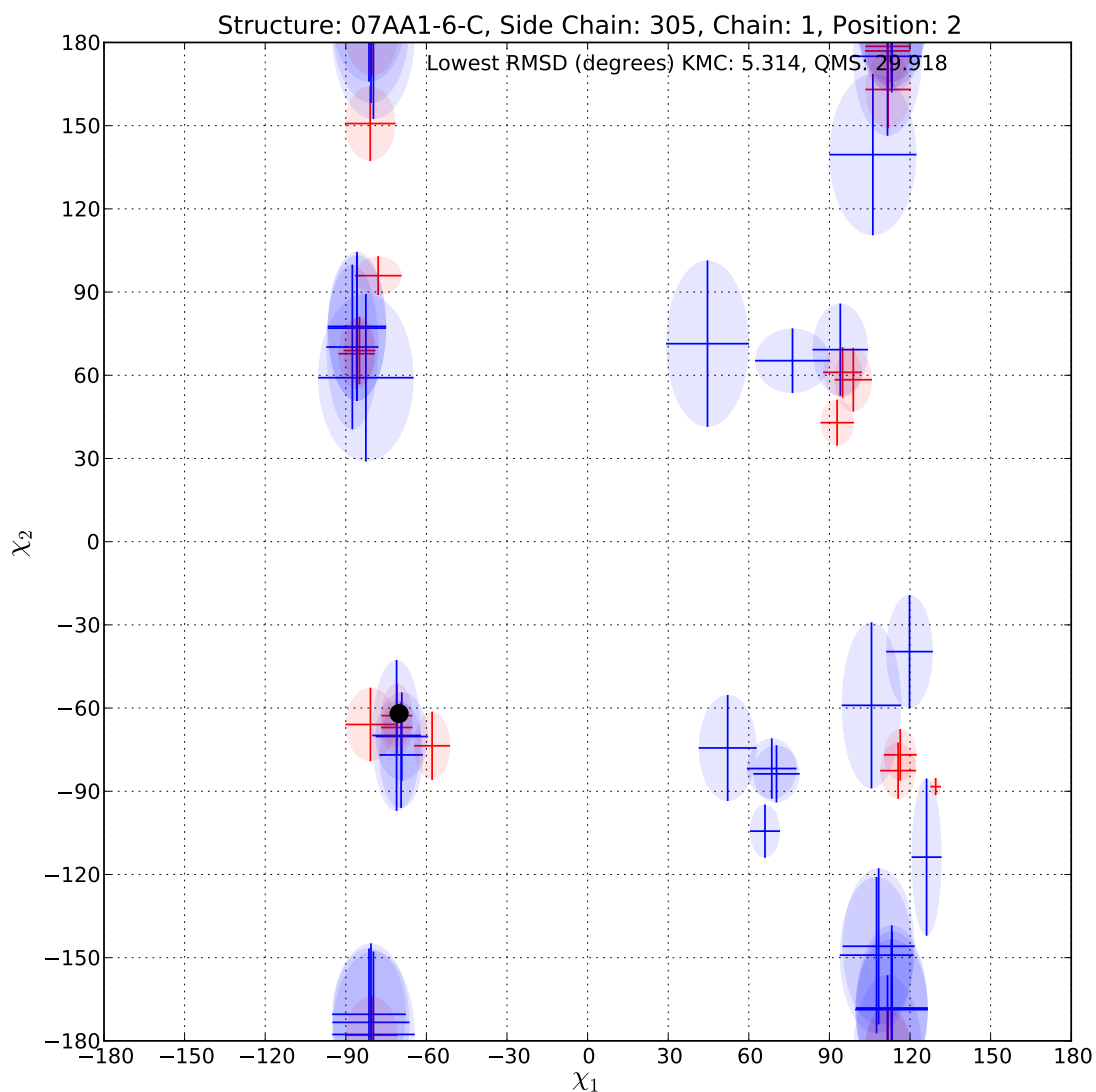

Figure S31: The rotamer library coverage plot for residue number 2 in chain 1 of peptoid databank structure 07AA1-6-C. Interpolated rotamers from the k-means clustering (KMC) method are shown as red ellipses and rotamers for the quantum mechanically-seeded (QMS) method are shown in blue. Experimental values shown as black circles.

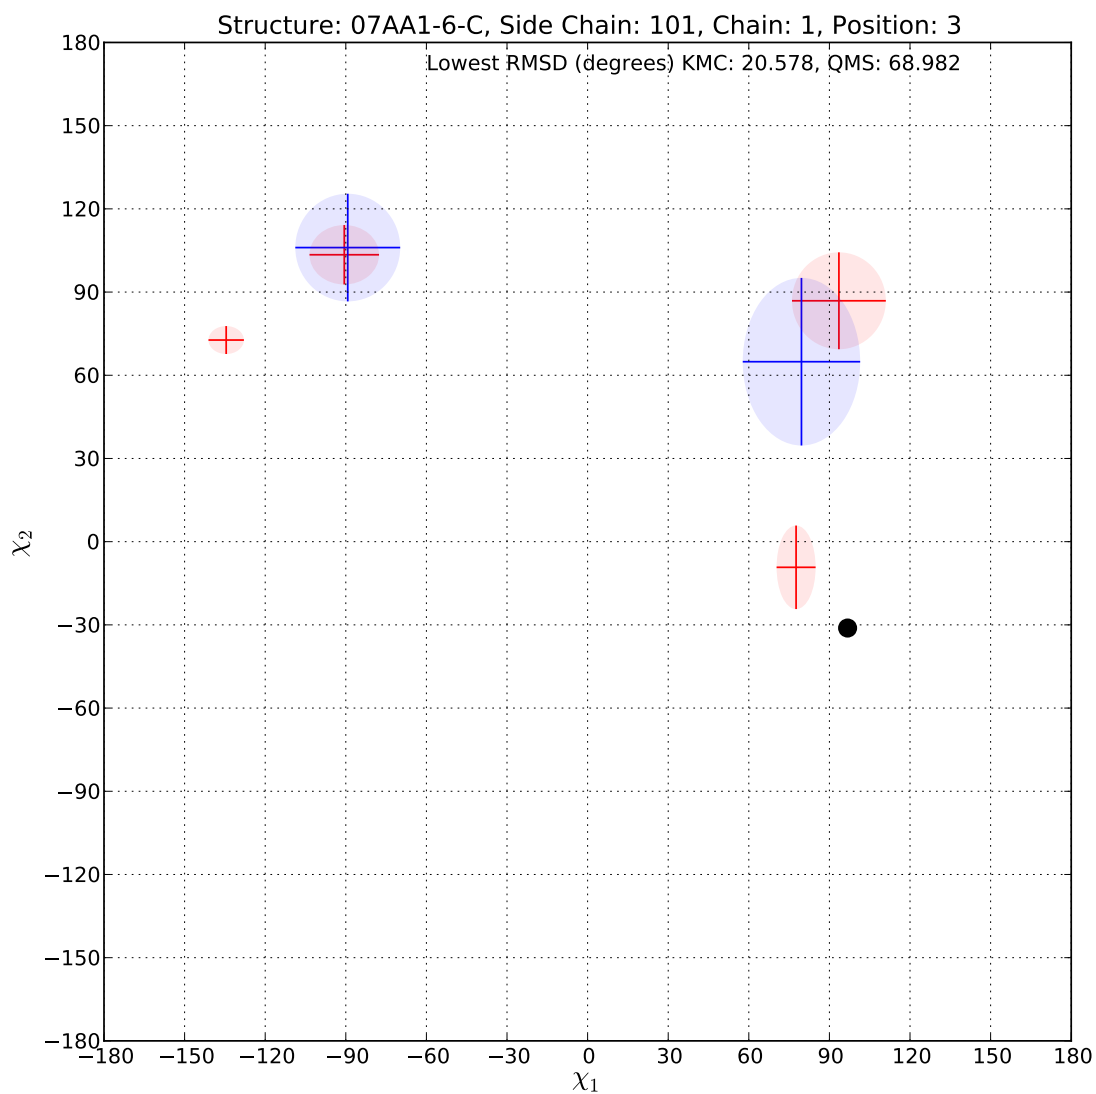

Figure S32: The rotamer library coverage plot for residue number 3 in chain 1 of peptoid databank structure 07AA1-6-C. Interpolated rotamers from the k-means clustering (KMC) method are shown as red ellipses and rotamers for the quantum mechanically-seeded (QMS) method are shown in blue. Experimental values shown as black circles.

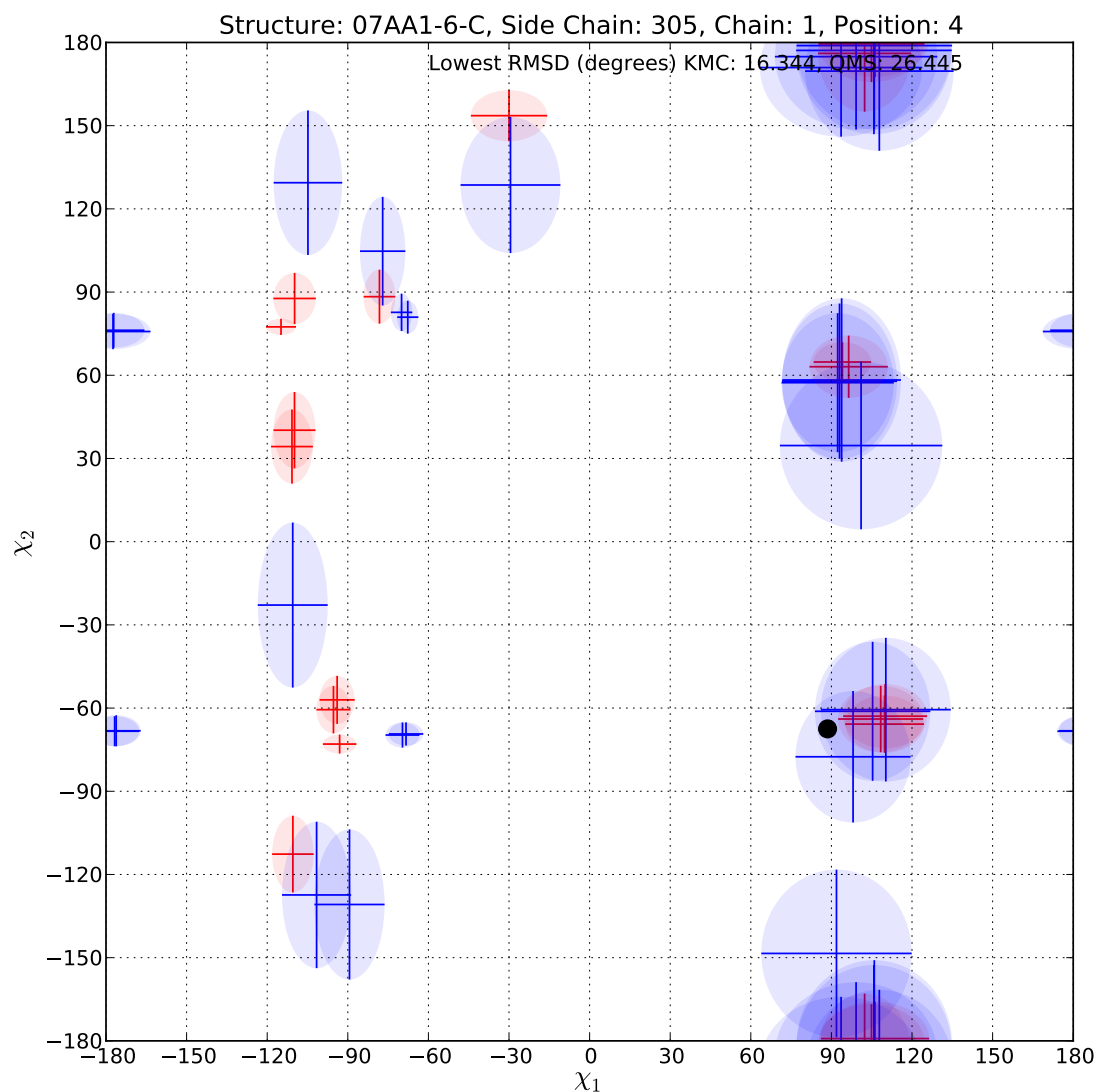

Figure S33: The rotamer library coverage plot for residue number 4 in chain 1 of peptoid databank structure 07AA1-6-C. Interpolated rotamers from the k-means clustering (KMC) method are shown as red ellipses and rotamers for the quantum mechanically-seeded (QMS) method are shown in blue. Experimental values shown as black circles.

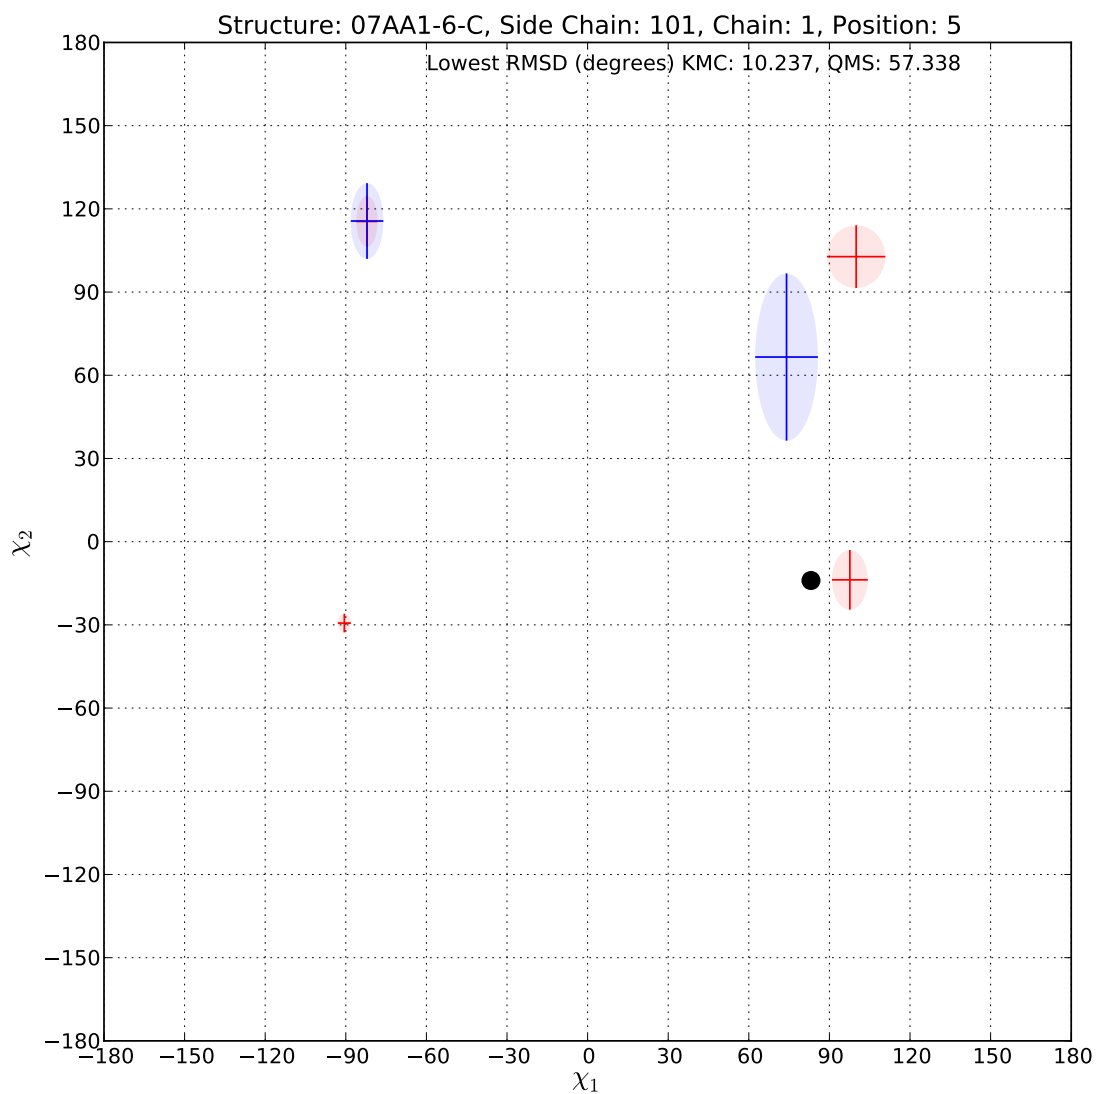

Figure S34: The rotamer library coverage plot for residue number 5 in chain 1 of peptoid databank structure 07AA1-6-C. Interpolated rotamers from the k-means clustering (KMC) method are shown as red ellipses and rotamers for the quantum mechanically-seeded (QMS) method are shown in blue. Experimental values shown as black circles.

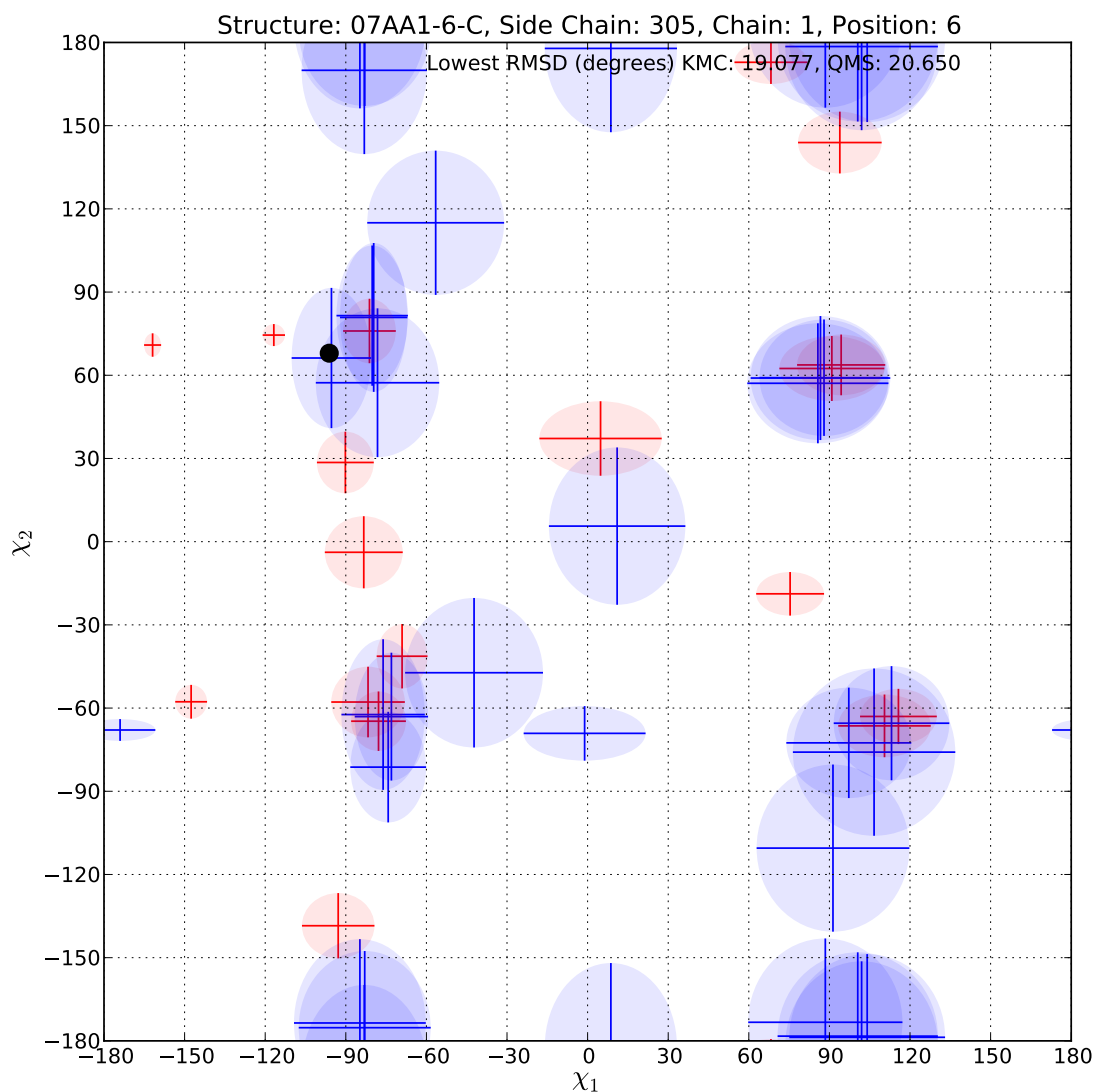

Figure S35: The rotamer library coverage plot for residue number 6 in chain 1 of peptoid databank structure 07AA1-6-C. Interpolated rotamers from the k-means clustering (KMC) method are shown as red ellipses and rotamers for the quantum mechanically-seeded (QMS) method are shown in blue. Experimental values shown as black circles.

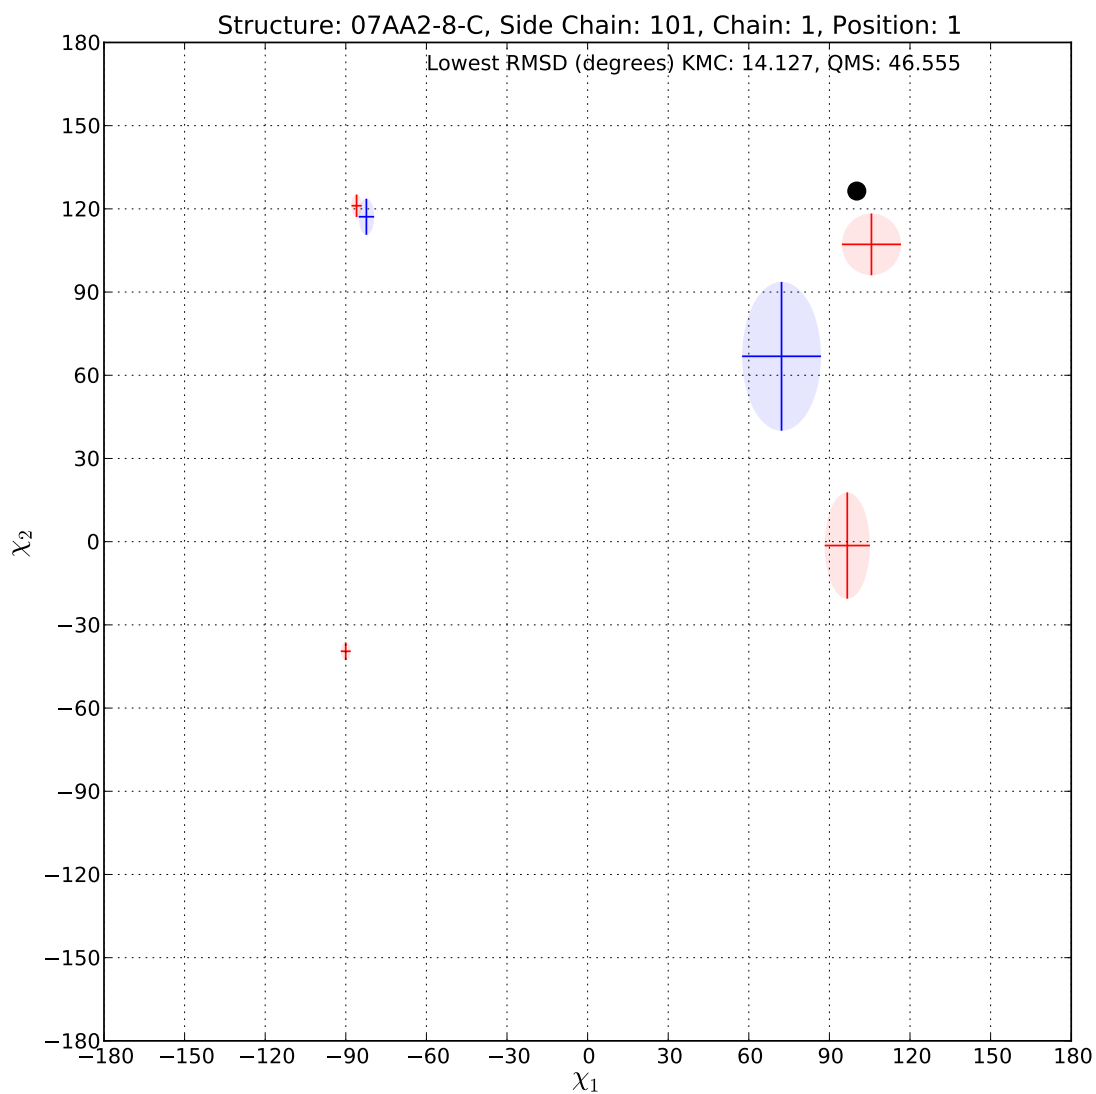

Figure S36: The rotamer library coverage plot for residue number 1 in chain 1 of peptoid databank structure 07AA2-8-C. Interpolated rotamers from the k-means clustering (KMC) method are shown as red ellipses and rotamers for the quantum mechanically-seeded (QMS) method are shown in blue. Experimental values shown as black circles.

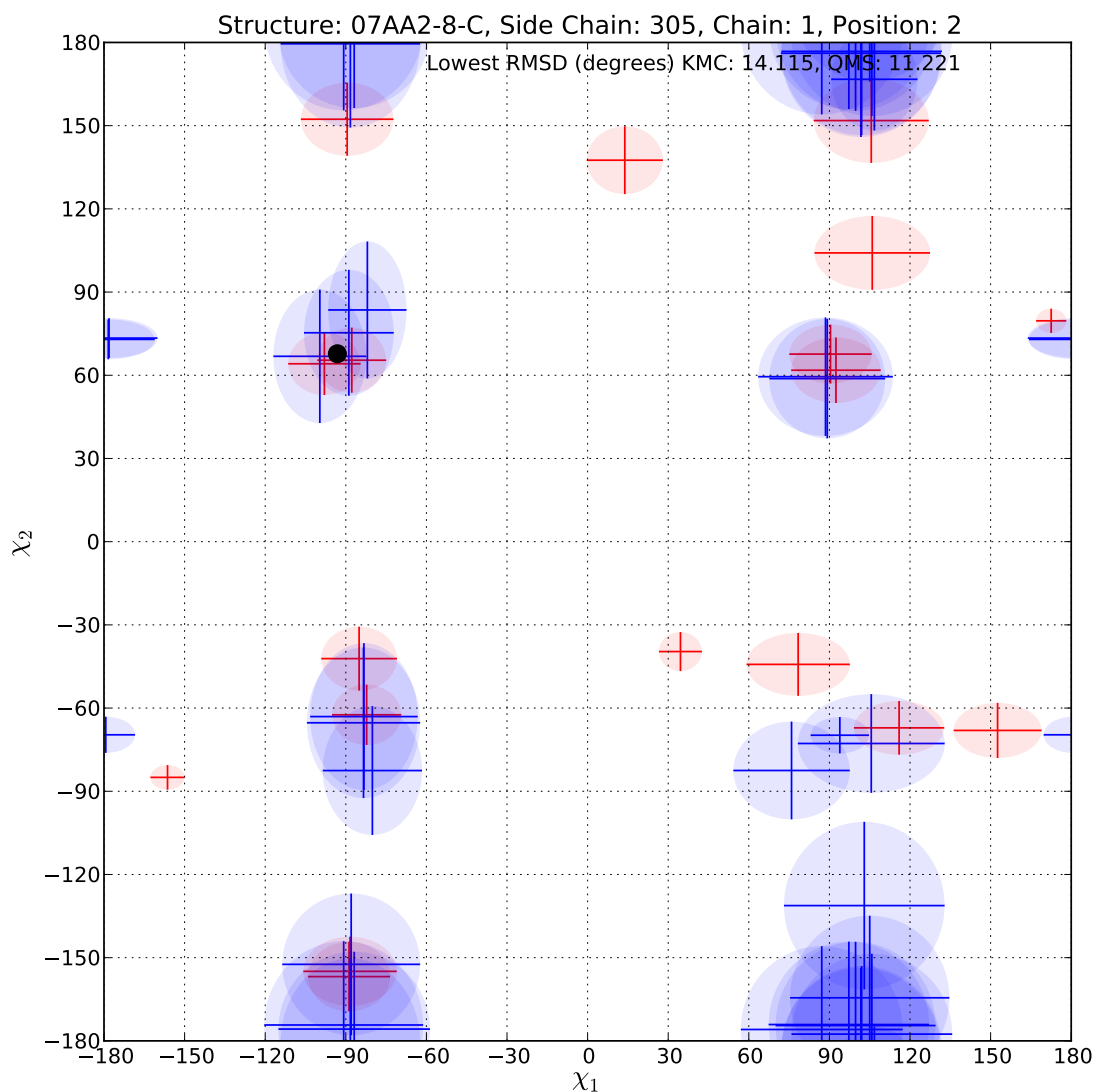

Figure S37: The rotamer library coverage plot for residue number 2 in chain 1 of peptoid databank structure 07AA2-8-C. Interpolated rotamers from the k-means clustering (KMC) method are shown as red ellipses and rotamers for the quantum mechanically-seeded (QMS) method are shown in blue. Experimental values shown as black circles.

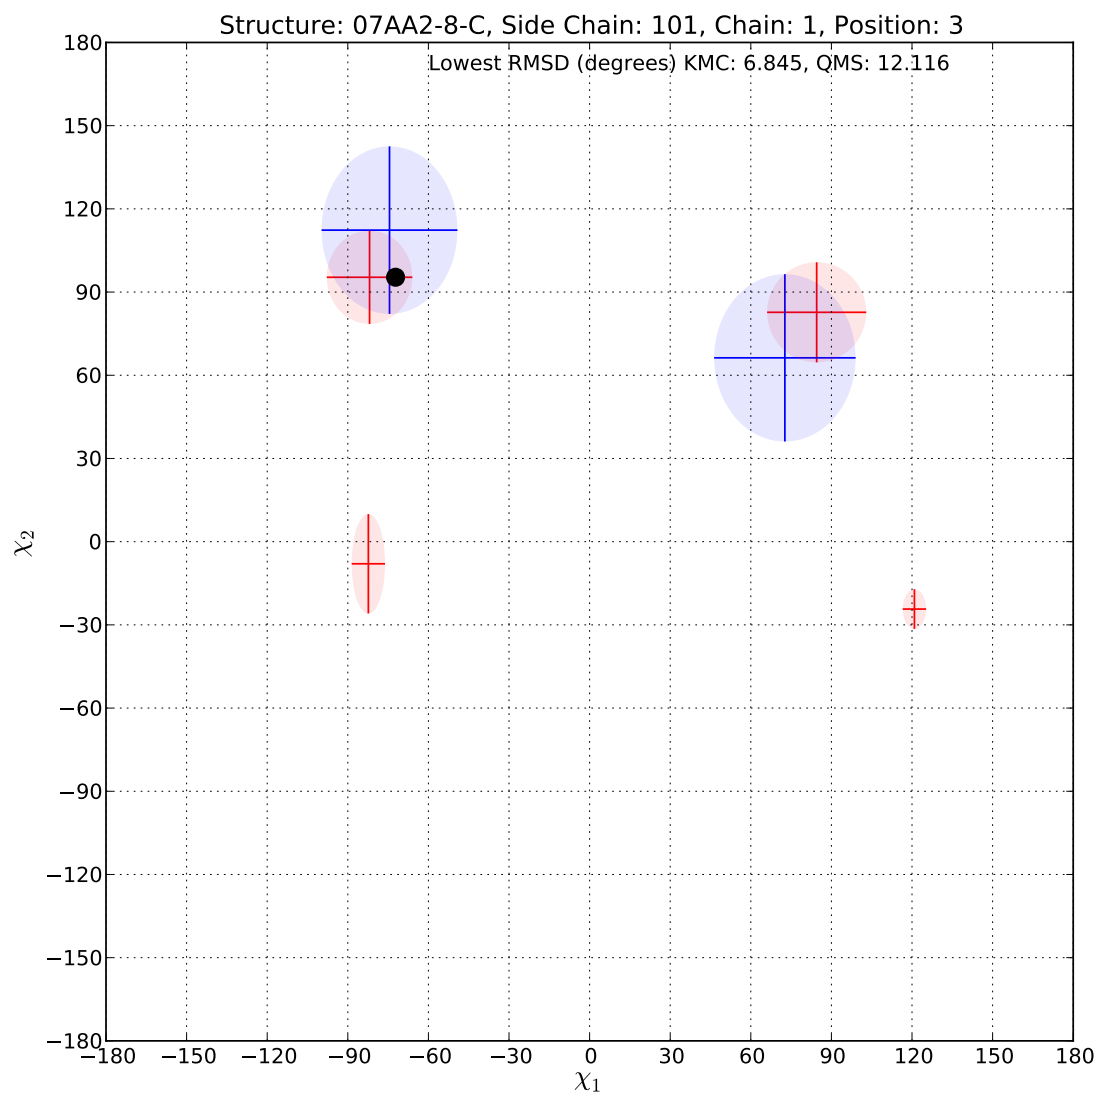

Figure S38: The rotamer library coverage plot for residue number 3 in chain 1 of peptoid databank structure 07AA2-8-C. Interpolated rotamers from the k-means clustering (KMC) method are shown as red ellipses and rotamers for the quantum mechanically-seeded (QMS) method are shown in blue. Experimental values shown as black circles.



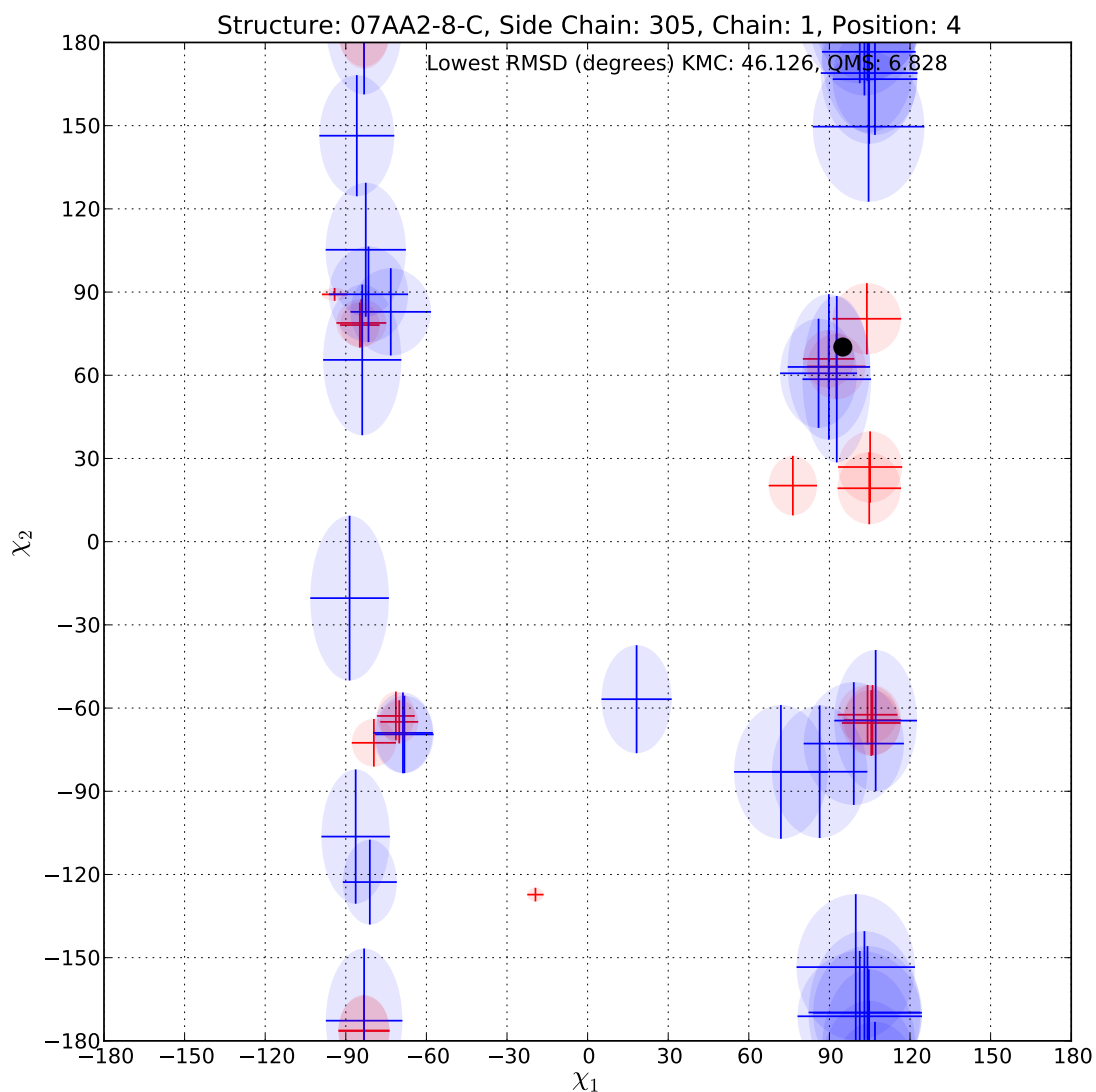

Figure S39: The rotamer library coverage plot for residue number 4 in chain 1 of peptoid databank structure 07AA2-8-C. Interpolated rotamers from the k-means clustering (KMC) method are shown as red ellipses and rotamers for the quantum mechanically-seeded (QMS) method are shown in blue. Experimental values shown as black circles.

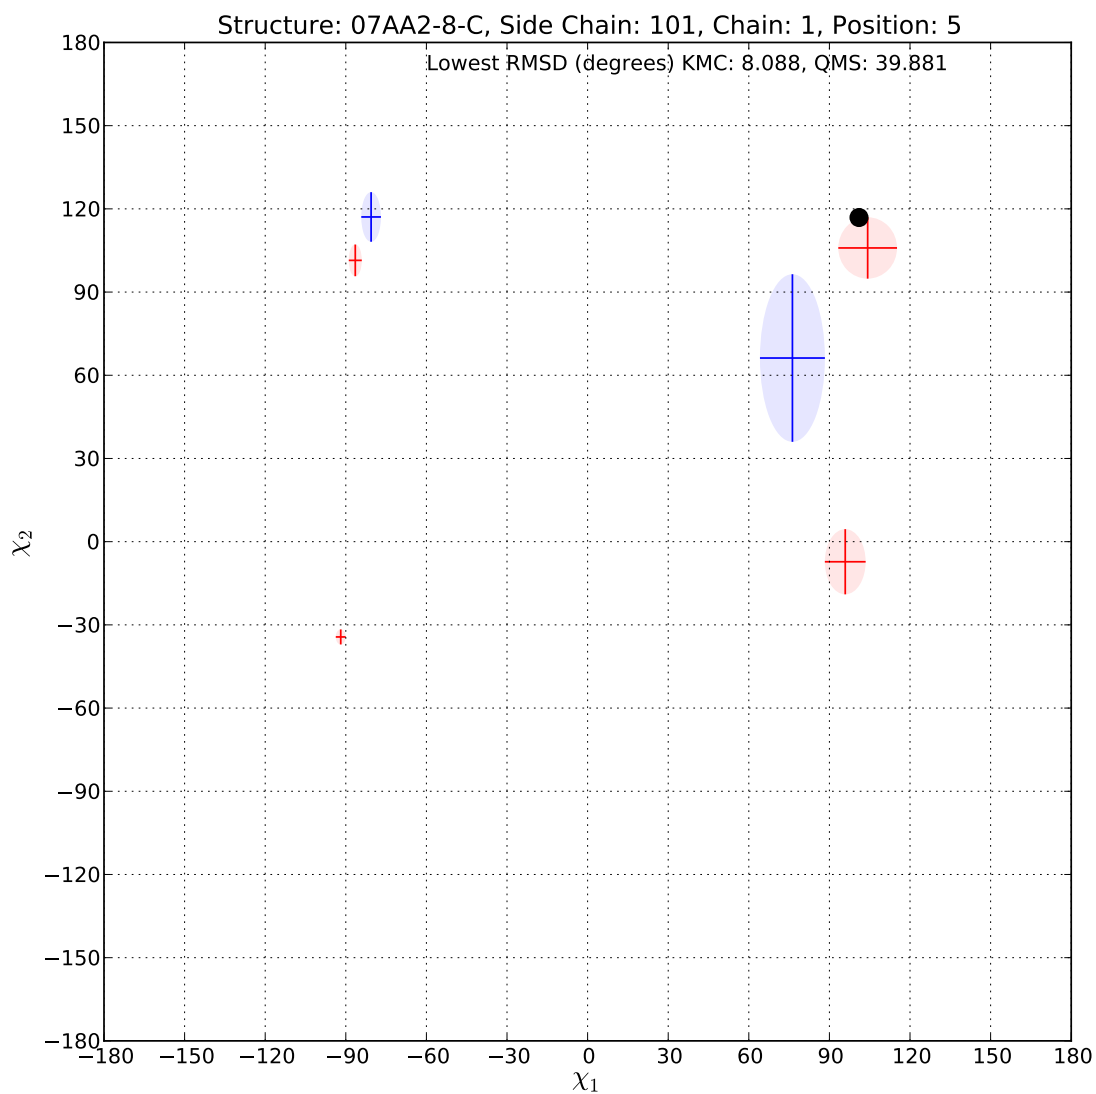

Figure S40: The rotamer library coverage plot for residue number 5 in chain 1 of peptoid databank structure 07AA2-8-C. Interpolated rotamers from the k-means clustering (KMC) method are shown as red ellipses and rotamers for the quantum mechanically-seeded (QMS) method are shown in blue. Experimental values shown as black circles.

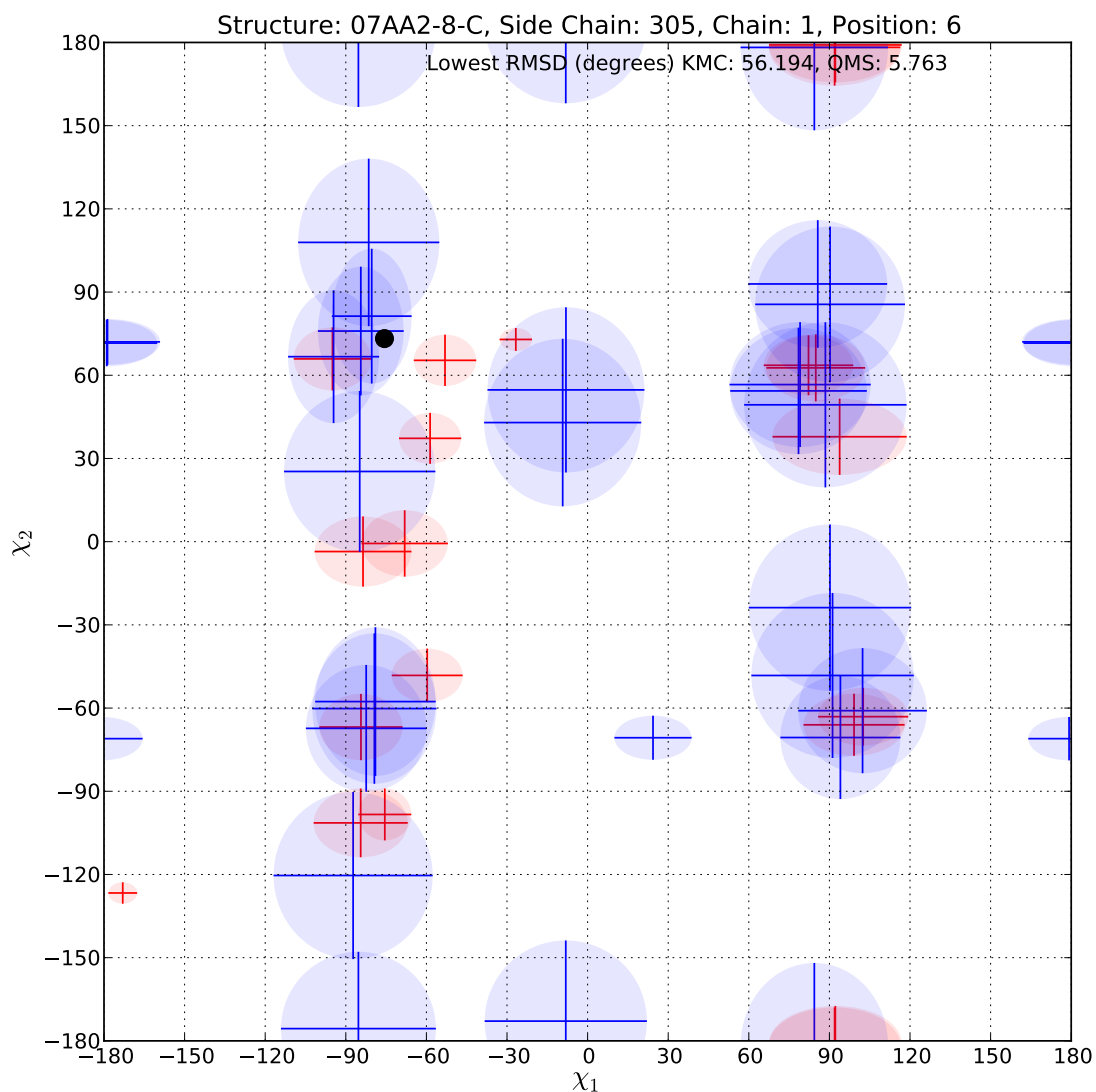

Figure S41: The rotamer library coverage plot for residue number 6 in chain 1 of peptoid databank structure 07AA2-8-C. Interpolated rotamers from the k-means clustering (KMC) method are shown as red ellipses and rotamers for the quantum mechanically-seeded (QMS) method are shown in blue. Experimental values shown as black circles.

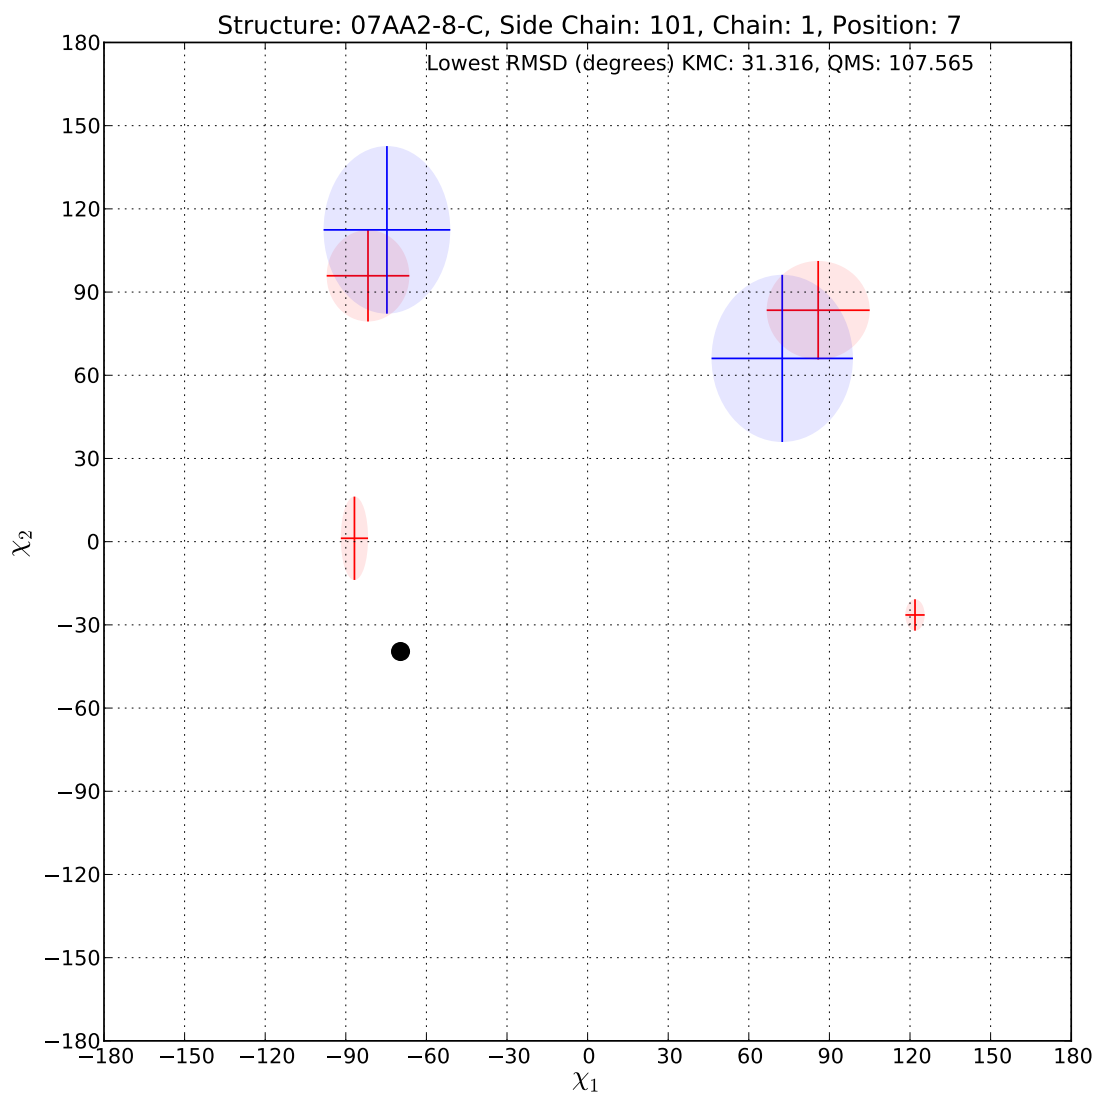

Figure S42: The rotamer library coverage plot for residue number 7 in chain 1 of peptoid databank structure 07AA2-8-C. Interpolated rotamers from the k-means clustering (KMC) method are shown as red ellipses and rotamers for the quantum mechanically-seeded (QMS) method are shown in blue. Experimental values shown as black circles.

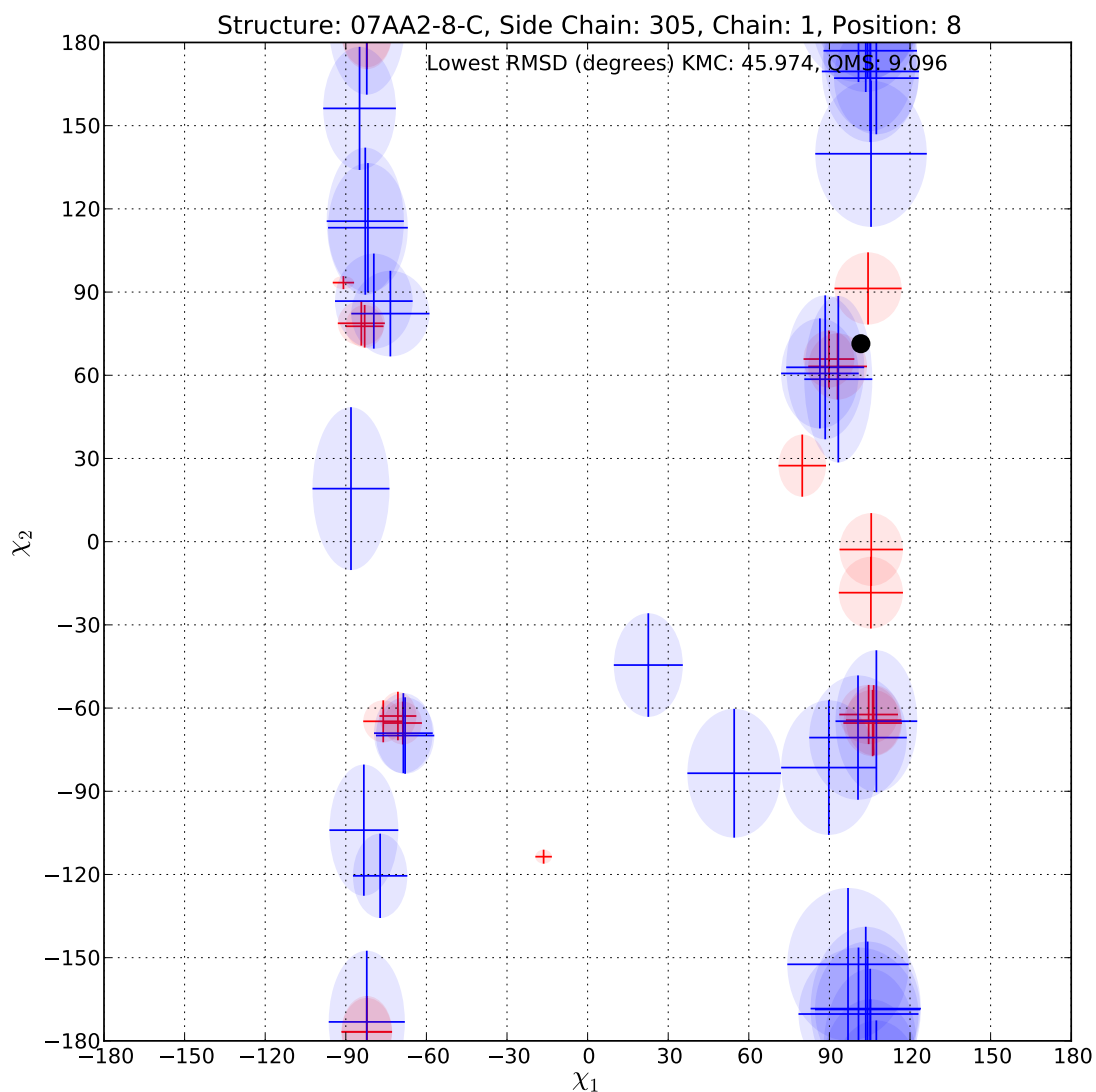

Figure S43: The rotamer library coverage plot for residue number 8 in chain 1 of peptoid databank structure 07AA2-8-C. Interpolated rotamers from the k-means clustering (KMC) method are shown as red ellipses and rotamers for the quantum mechanically-seeded (QMS) method are shown in blue. Experimental values shown as black circles.

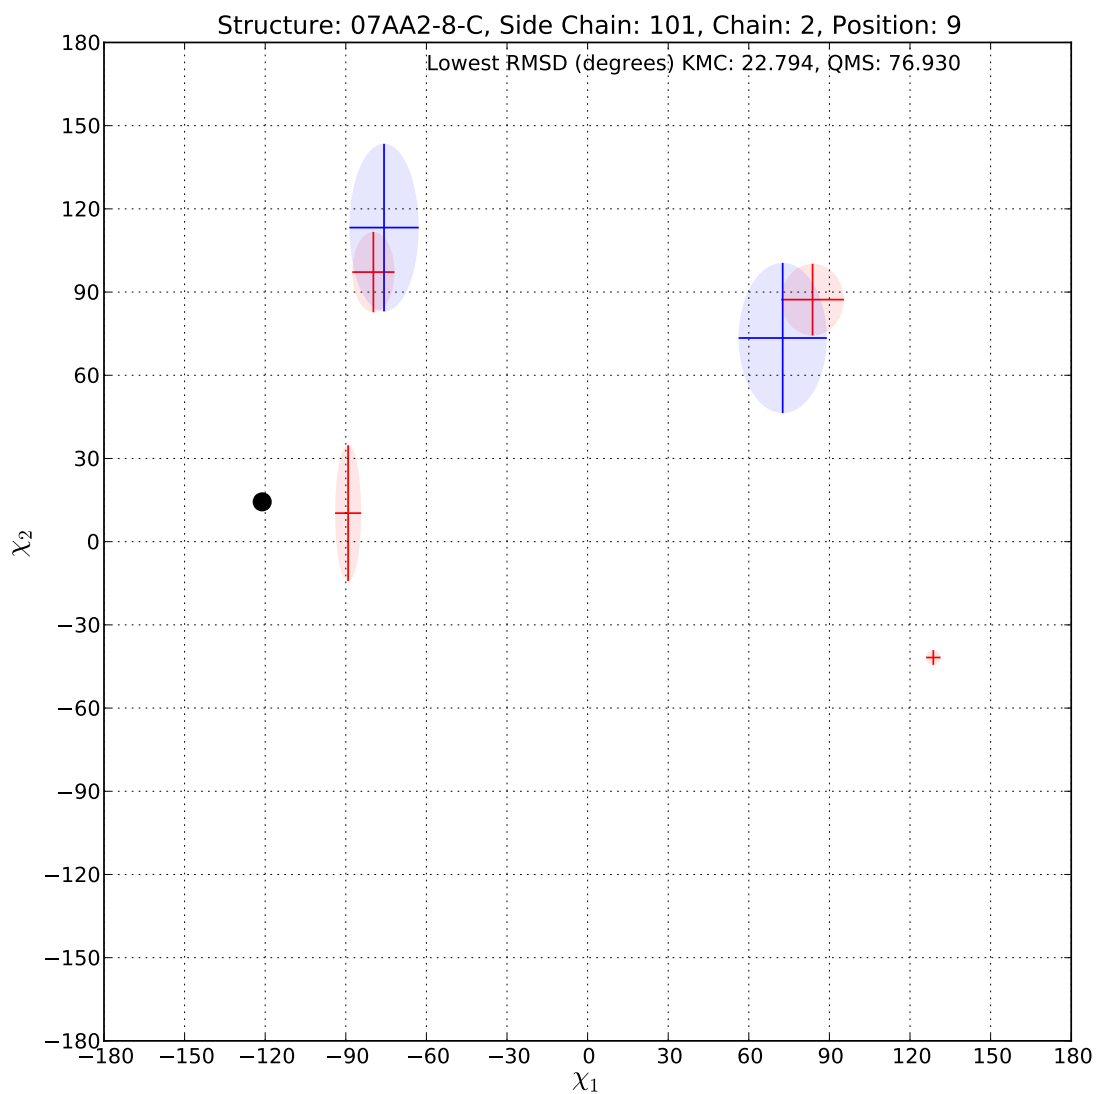

Figure S44: The rotamer library coverage plot for residue number 9 in chain 2 of peptoid databank structure 07AA2-8-C. Interpolated rotamers from the k-means clustering (KMC) method are shown as red ellipses and rotamers for the quantum mechanically-seeded (QMS) method are shown in blue. Experimental values shown as black circles.

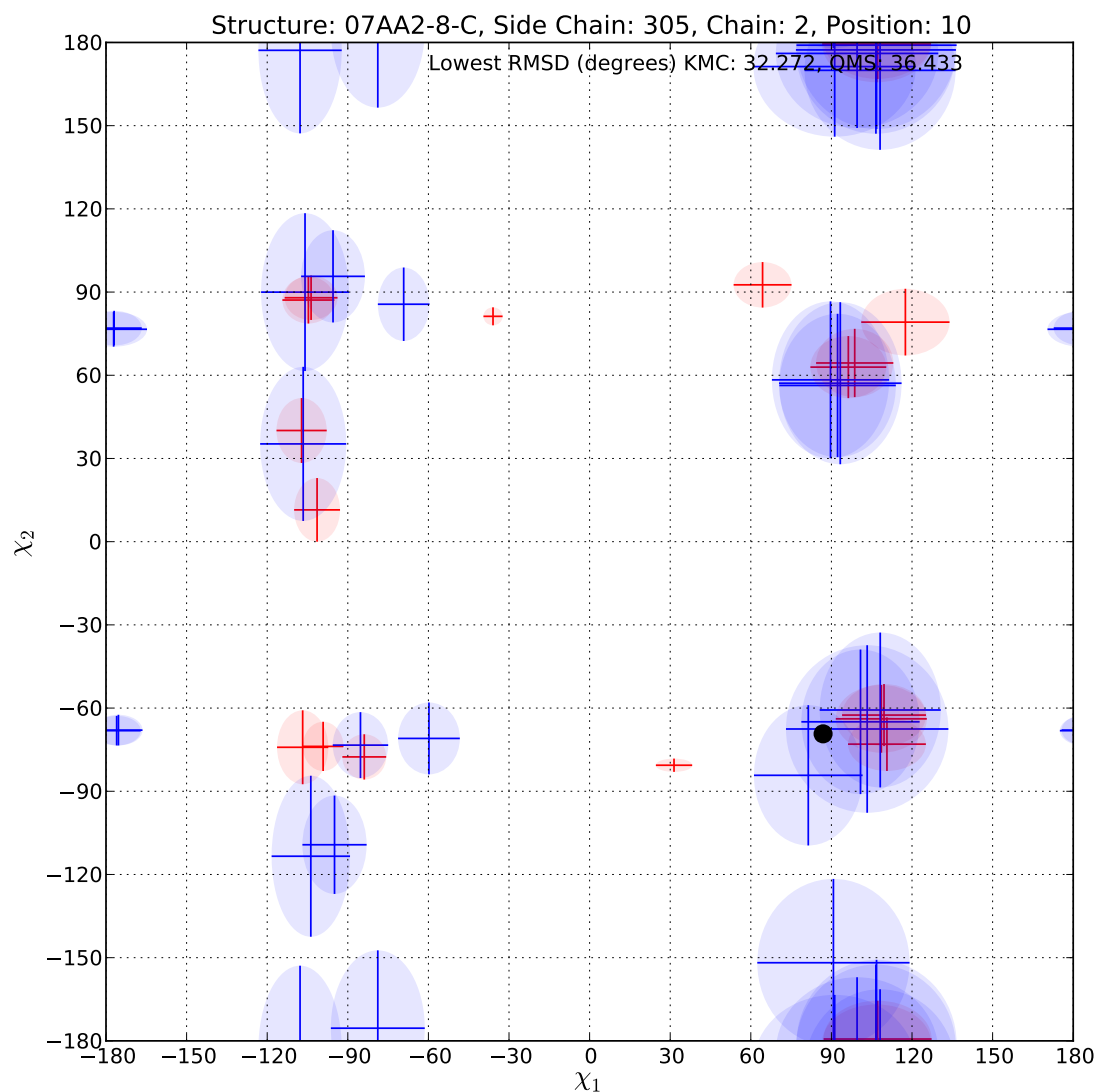

Figure S45: The rotamer library coverage plot for residue number 10 in chain 2 of peptoid databank structure 07AA2-8-C. Interpolated rotamers from the k-means clustering (KMC) method are shown as red ellipses and rotamers for the quantum mechanically-seeded (QMS) method are shown in blue. Experimental values shown as black circles.

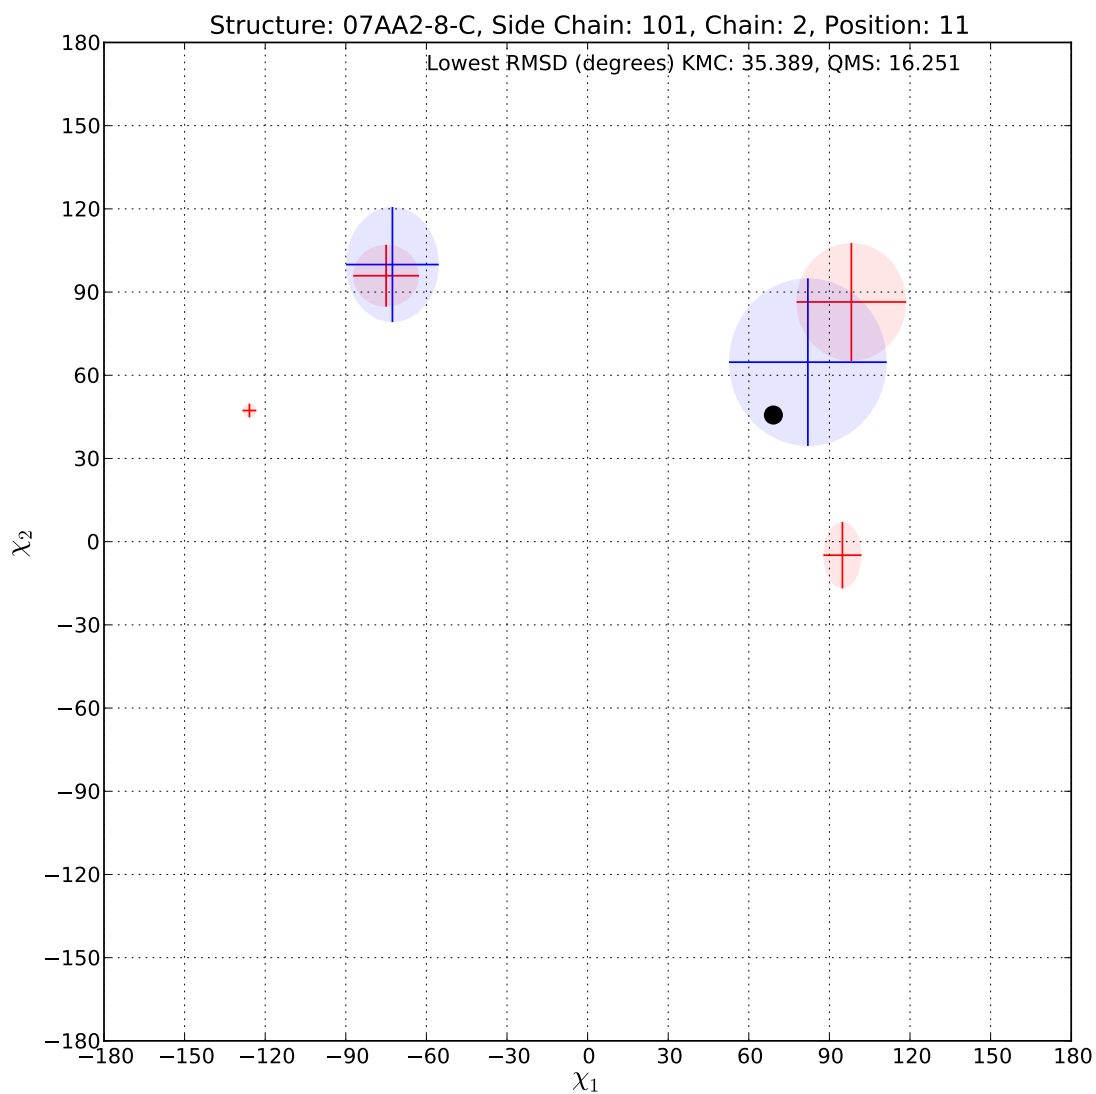

Figure S46: The rotamer library coverage plot for residue number 11 in chain 2 of peptoid databank structure 07AA2-8-C. Interpolated rotamers from the k-means clustering (KMC) method are shown as red ellipses and rotamers for the quantum mechanically-seeded (QMS) method are shown in blue. Experimental values shown as black circles.



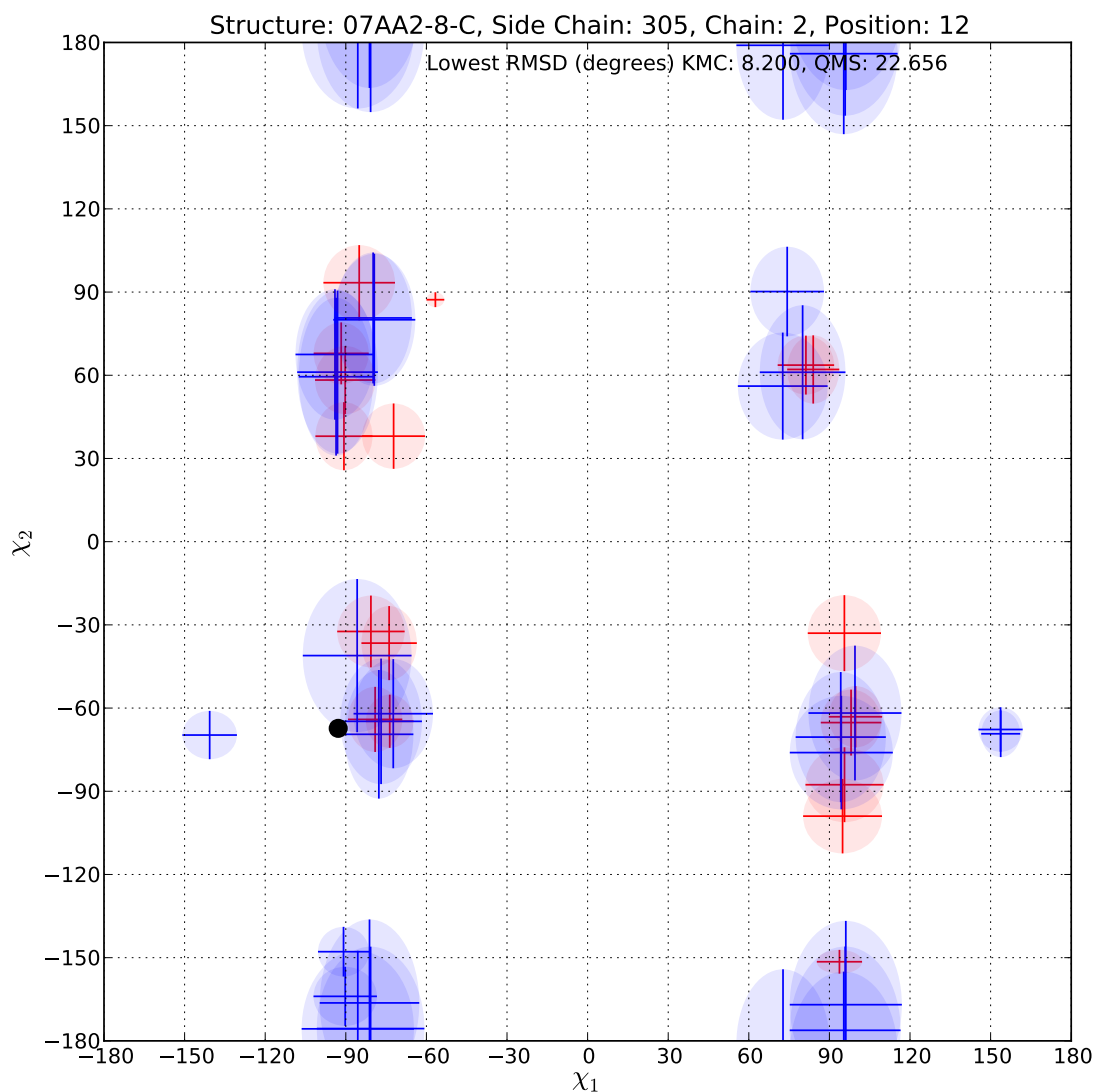

Figure S47: The rotamer library coverage plot for residue number 12 in chain 2 of peptoid databank structure 07AA2-8-C. Interpolated rotamers from the k-means clustering (KMC) method are shown as red ellipses and rotamers for the quantum mechanically-seeded (QMS) method are shown in blue. Experimental values shown as black circles.

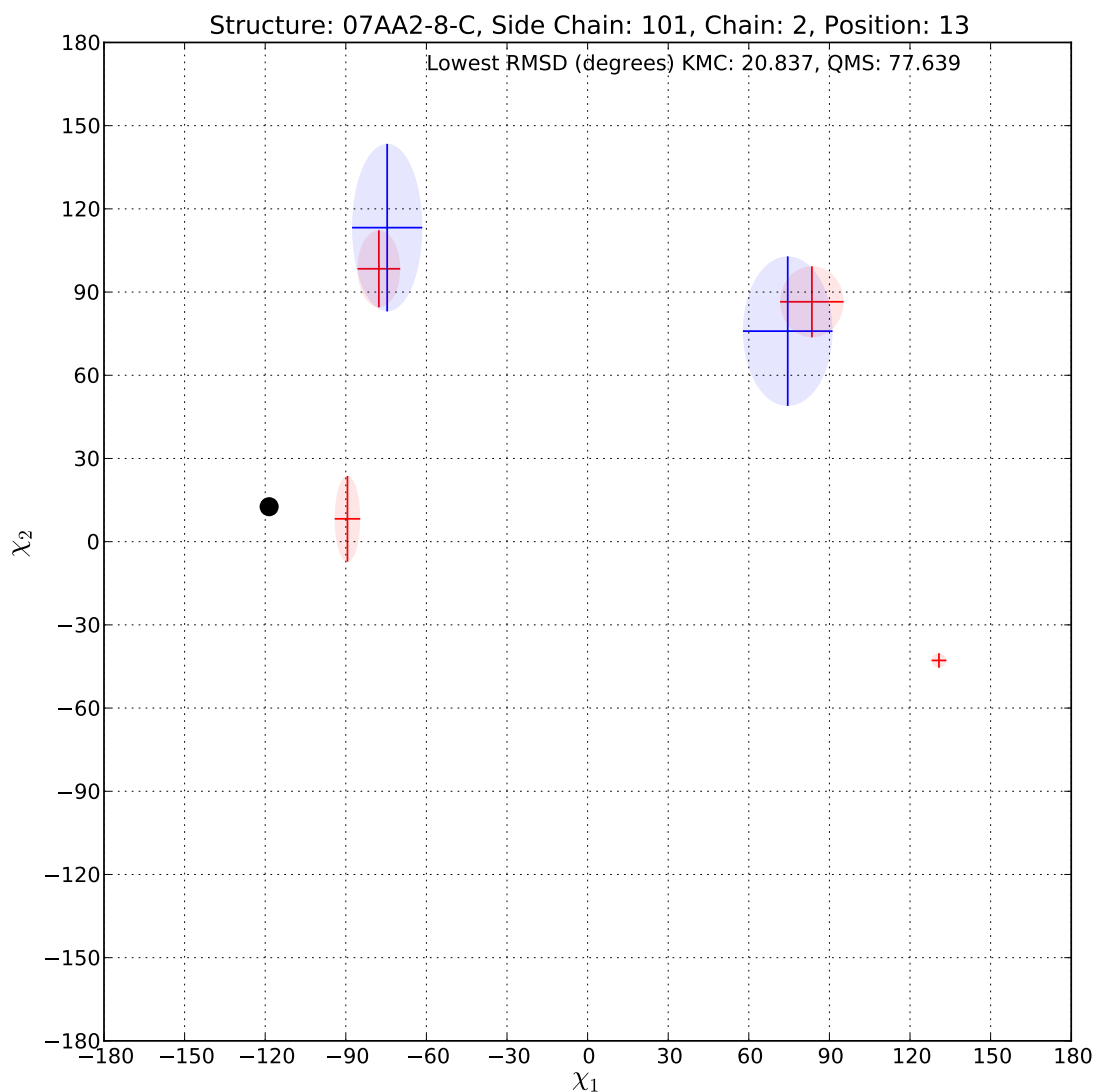

Figure S48: The rotamer library coverage plot for residue number 13 in chain 2 of peptoid databank structure 07AA2-8-C. Interpolated rotamers from the k-means clustering (KMC) method are shown as red ellipses and rotamers for the quantum mechanically-seeded (QMS) method are shown in blue. Experimental values shown as black circles.

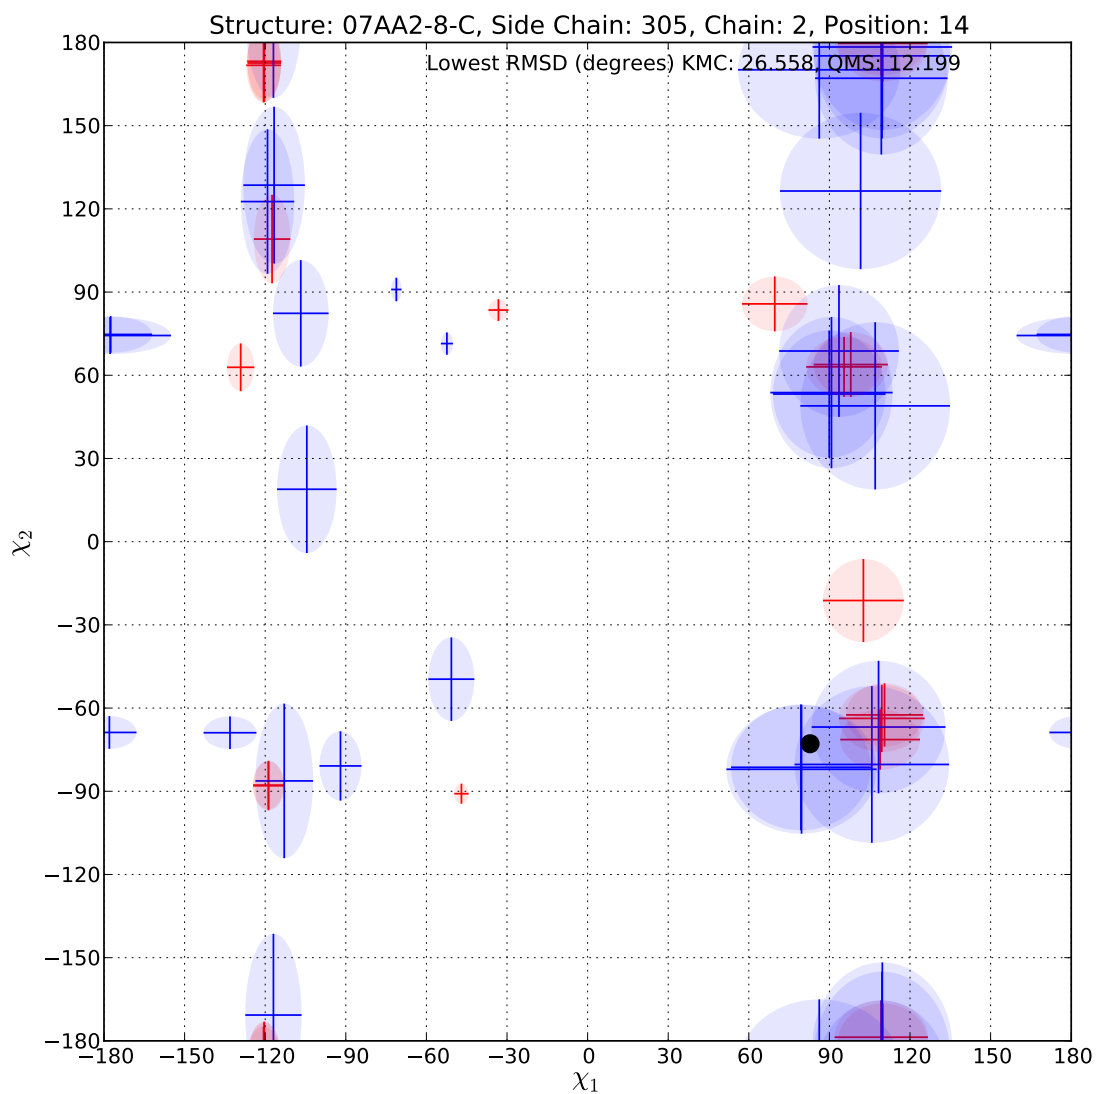

Figure S49: The rotamer library coverage plot for residue number 14 in chain 2 of peptoid databank structure 07AA2-8-C. Interpolated rotamers from the k-means clustering (KMC) method are shown as red ellipses and rotamers for the quantum mechanically-seeded (QMS) method are shown in blue. Experimental values shown as black circles.

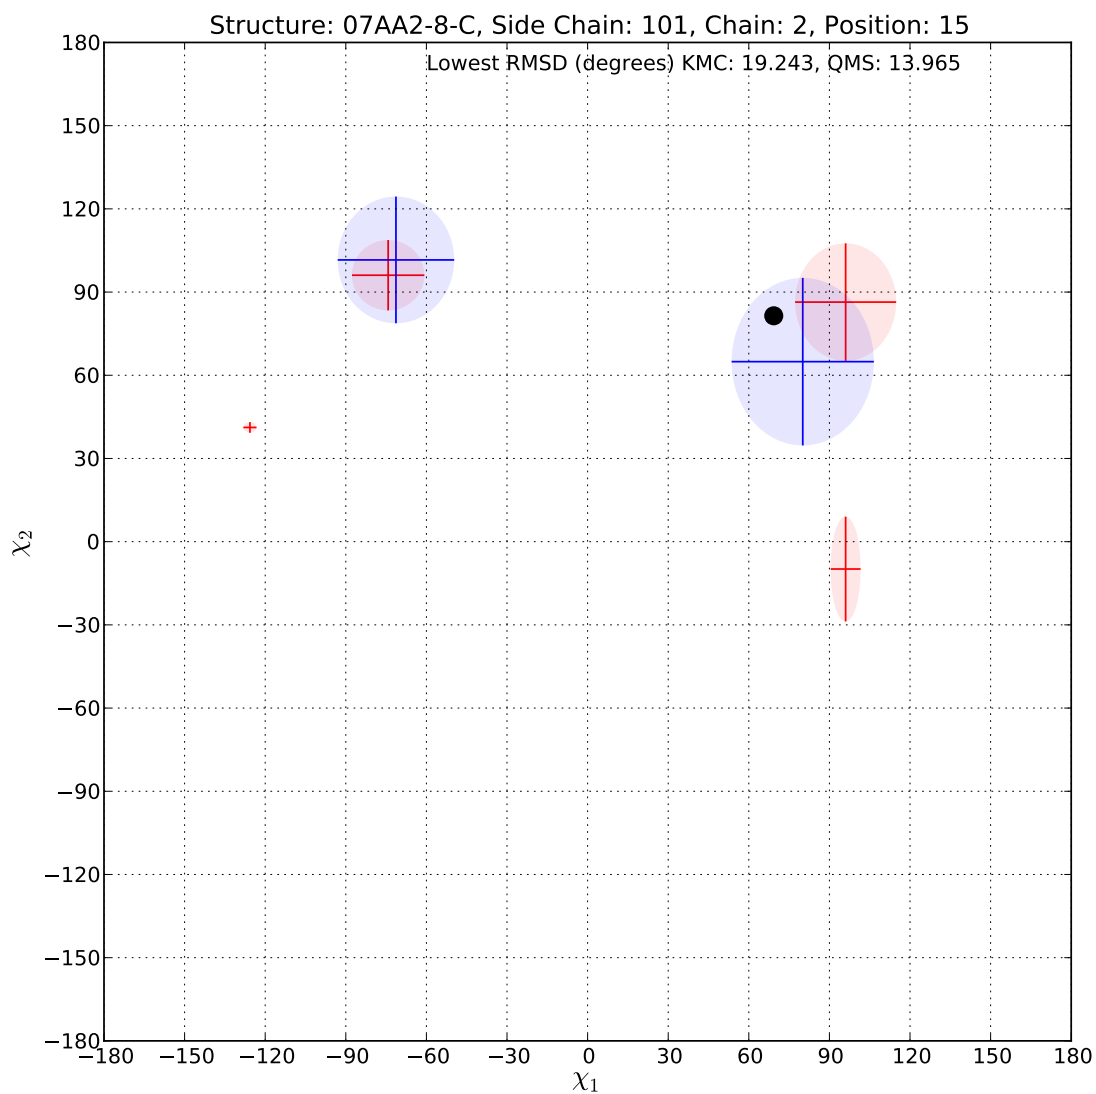

Figure S50: The rotamer library coverage plot for residue number 15 in chain 2 of peptoid databank structure 07AA2-8-C. Interpolated rotamers from the k-means clustering (KMC) method are shown as red ellipses and rotamers for the quantum mechanically-seeded (QMS) method are shown in blue. Experimental values shown as black circles.

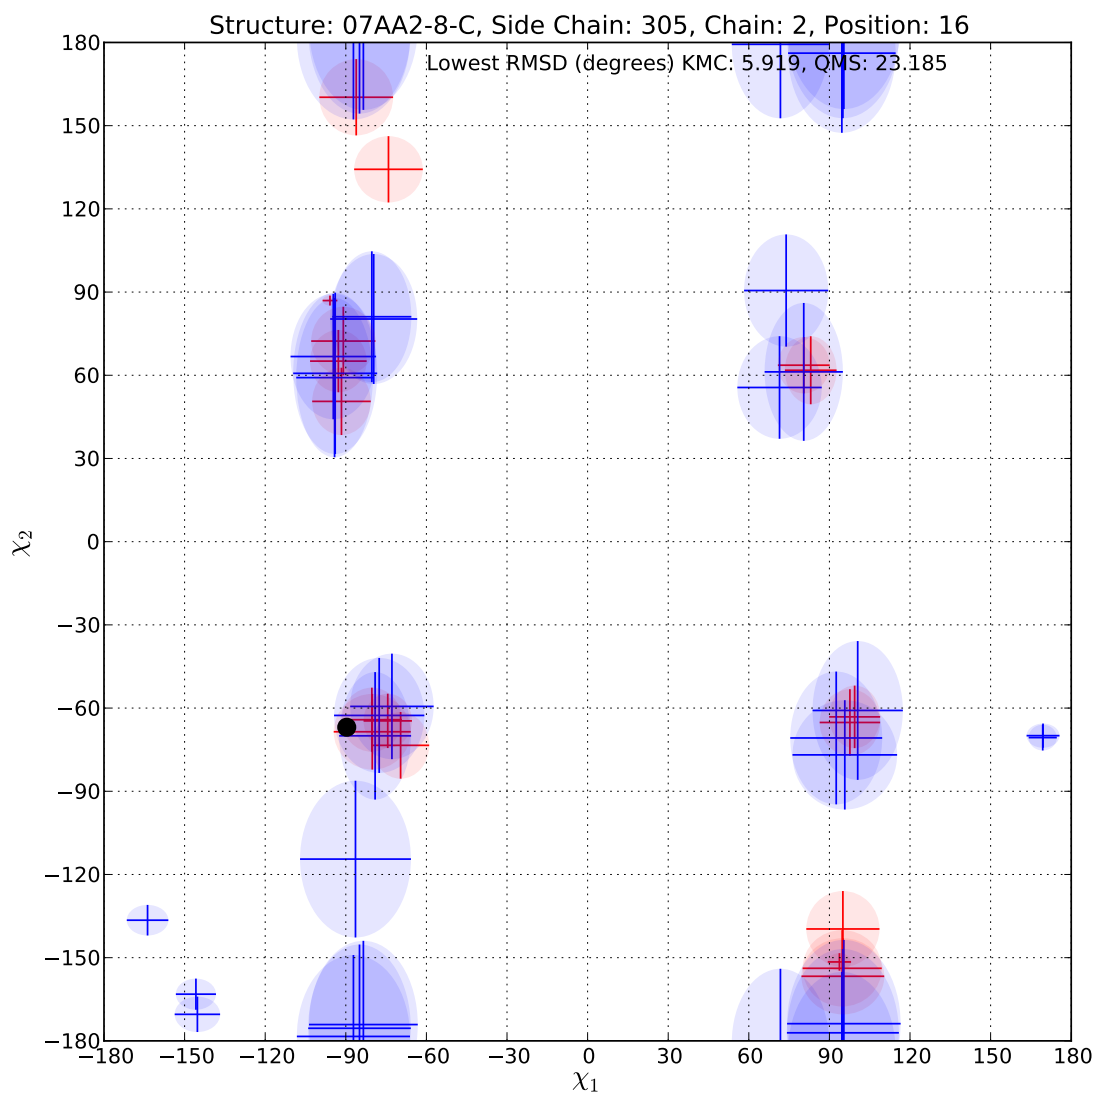

Figure S51: The rotamer library coverage plot for residue number 16 in chain 2 of peptoid databank structure 07AA2-8-C. Interpolated rotamers from the k-means clustering (KMC) method are shown as red ellipses and rotamers for the quantum mechanically-seeded (QMS) method are shown in blue. Experimental values shown as black circles.

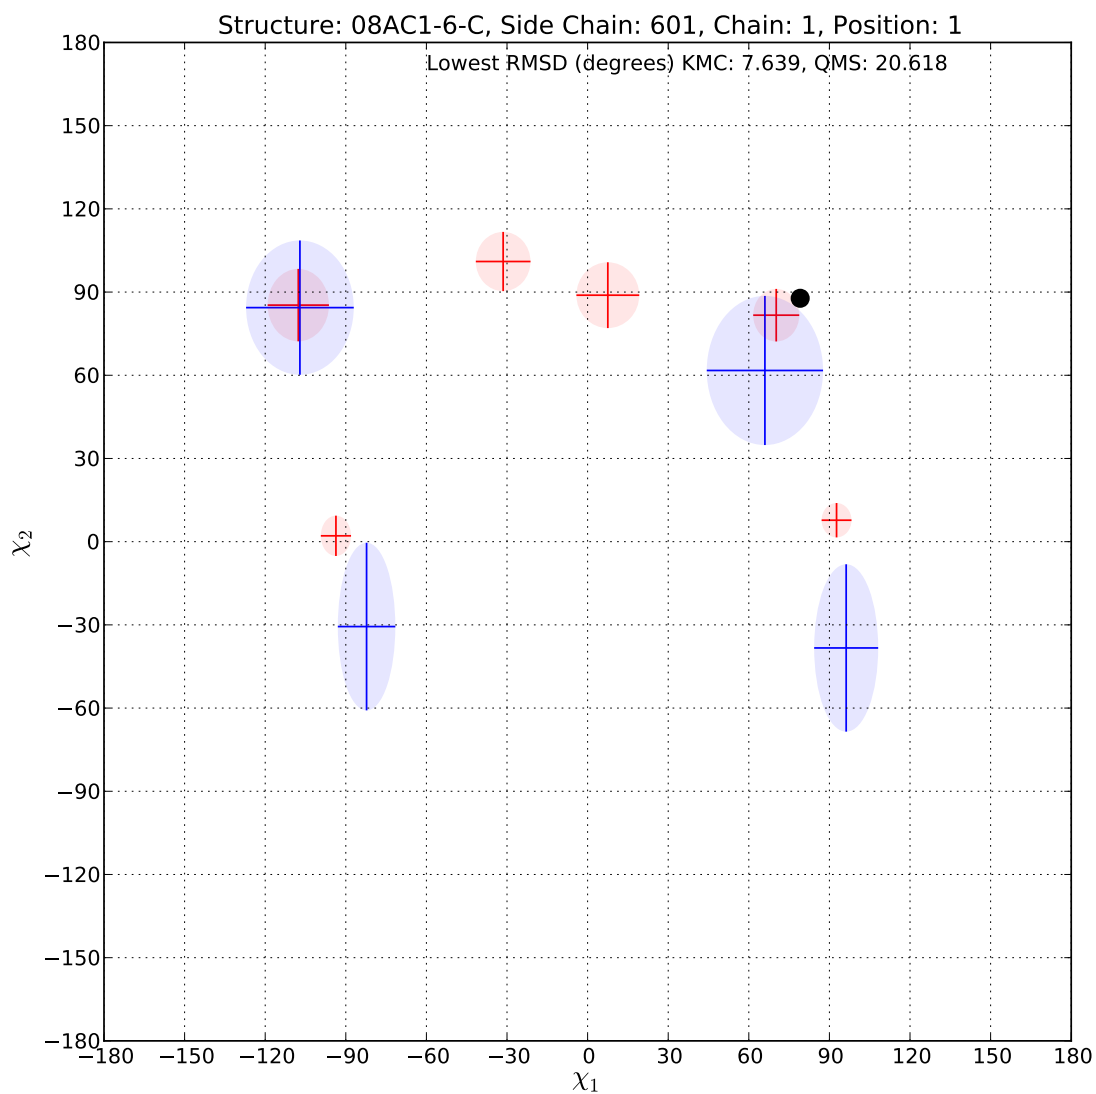

Figure S52: The rotamer library coverage plot for residue number 1 in chain 1 of peptoid databank structure 08AC1-6-C. Interpolated rotamers from the k-means clustering (KMC) method are shown as red ellipses and rotamers for the quantum mechanically-seeded (QMS) method are shown in blue. Experimental values shown as black circles.

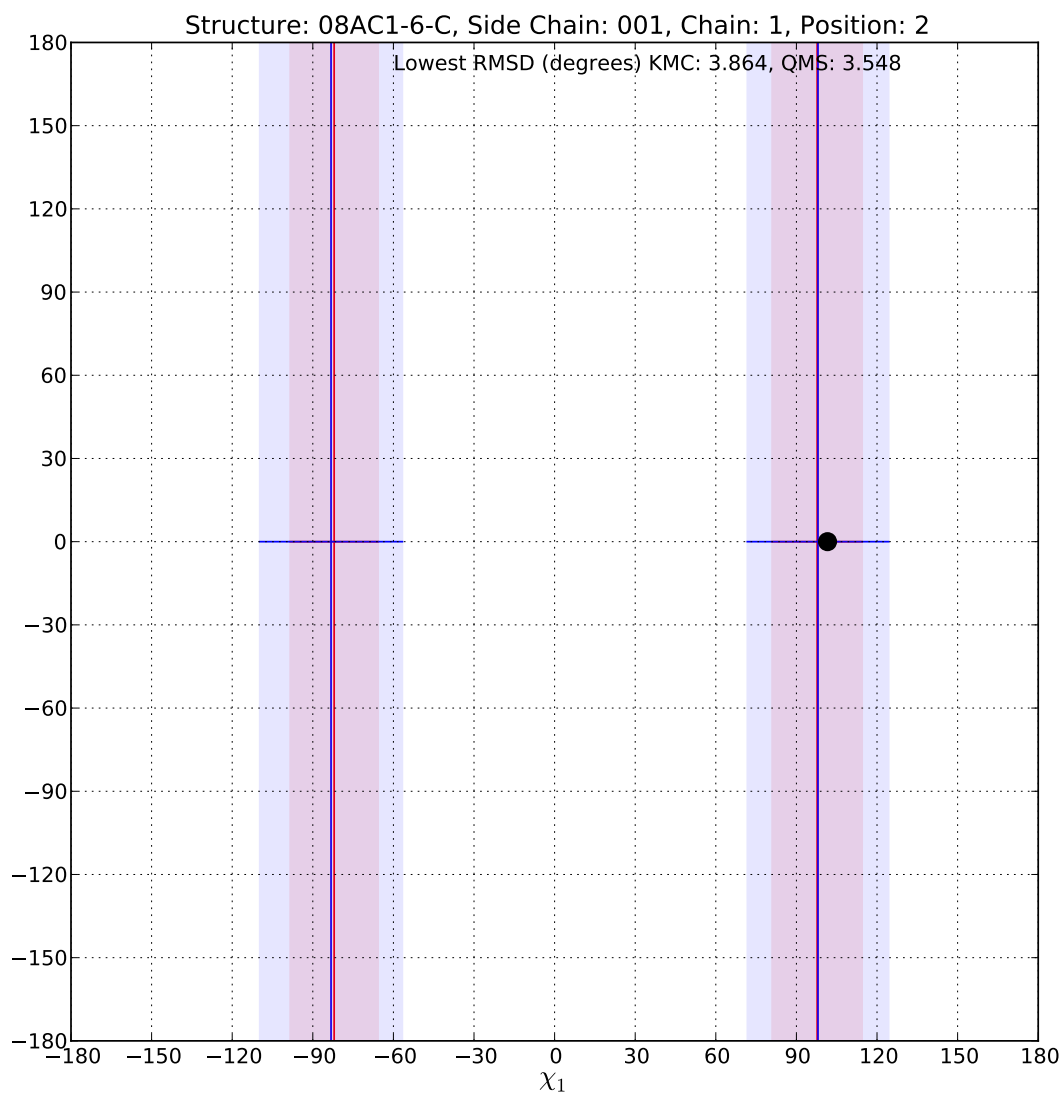

Figure S53: The rotamer library coverage plot for residue number 2 in chain 1 of peptoid databank structure 08AC1-6-C. Interpolated rotamers from the k-means clustering (KMC) method are shown as red ellipses and rotamers for the quantum mechanically-seeded (QMS) method are shown in blue. Experimental values shown as black circles.

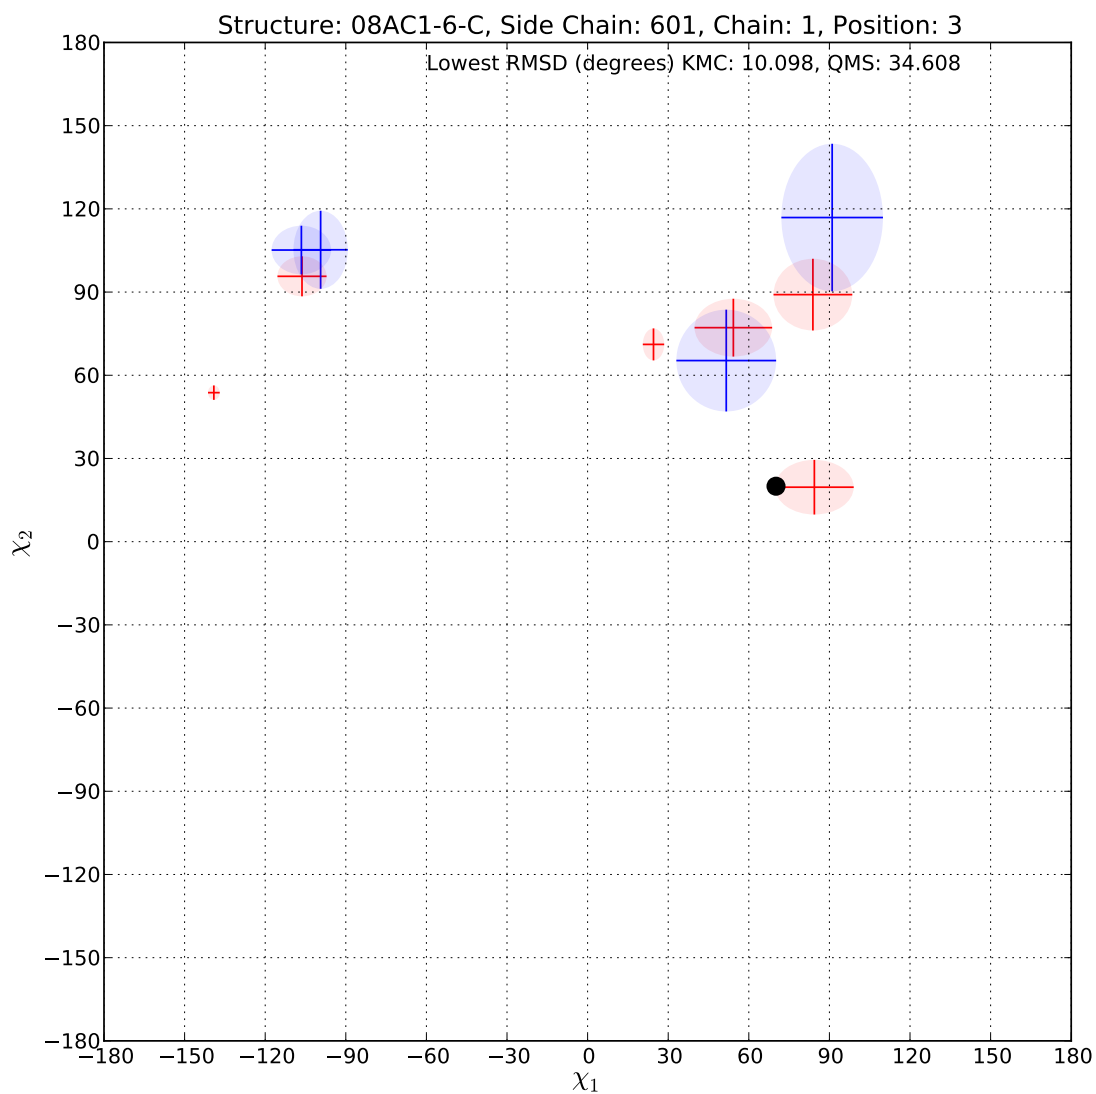

Figure S54: The rotamer library coverage plot for residue number 3 in chain 1 of peptoid databank structure 08AC1-6-C. Interpolated rotamers from the k-means clustering (KMC) method are shown as red ellipses and rotamers for the quantum mechanically-seeded (QMS) method are shown in blue. Experimental values shown as black circles.



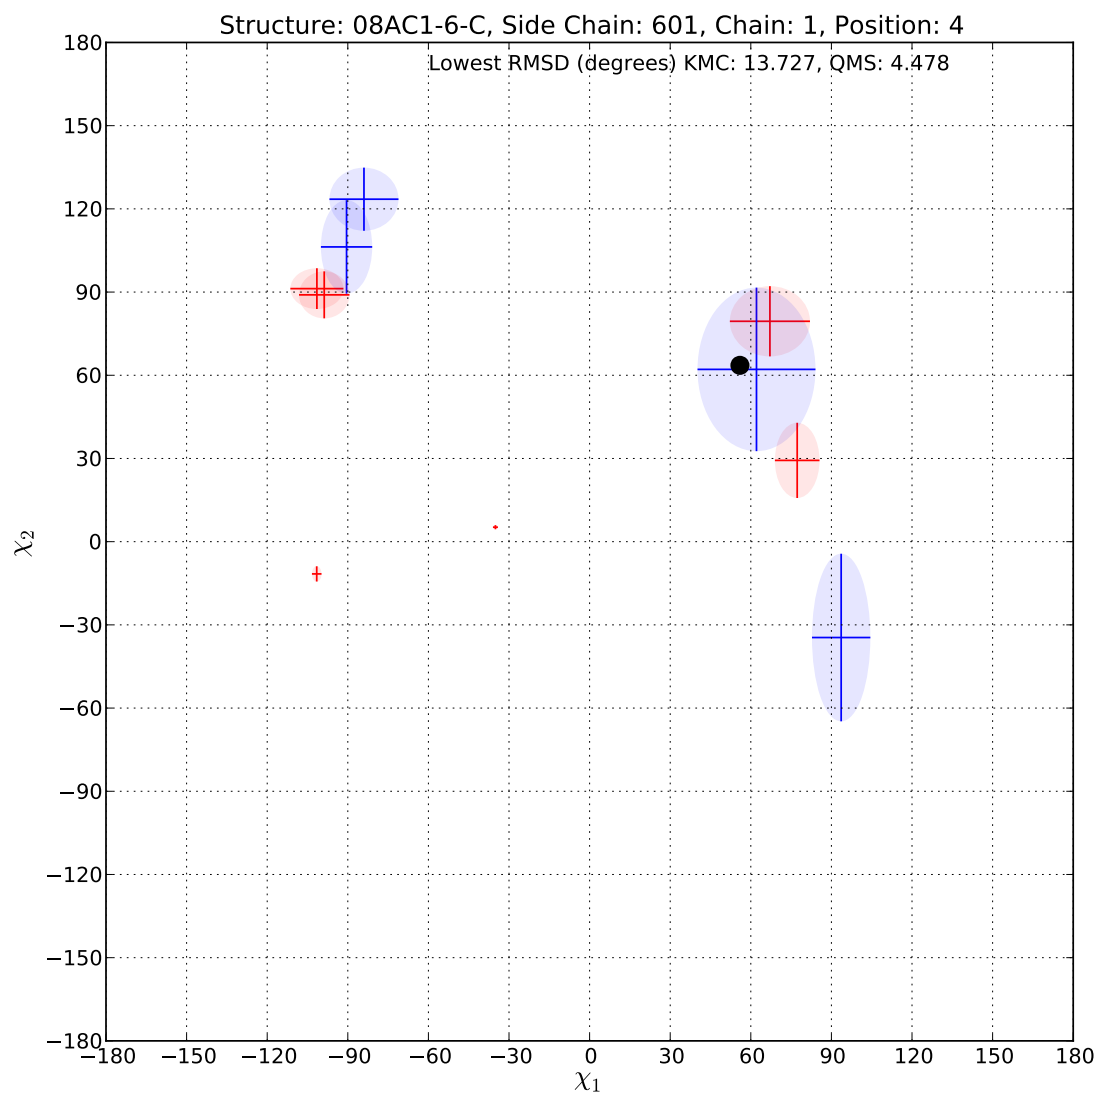

Figure S55: The rotamer library coverage plot for residue number 4 in chain 1 of peptoid databank structure 08AC1-6-C. Interpolated rotamers from the k-means clustering (KMC) method are shown as red ellipses and rotamers for the quantum mechanically-seeded (QMS) method are shown in blue. Experimental values shown as black circles.

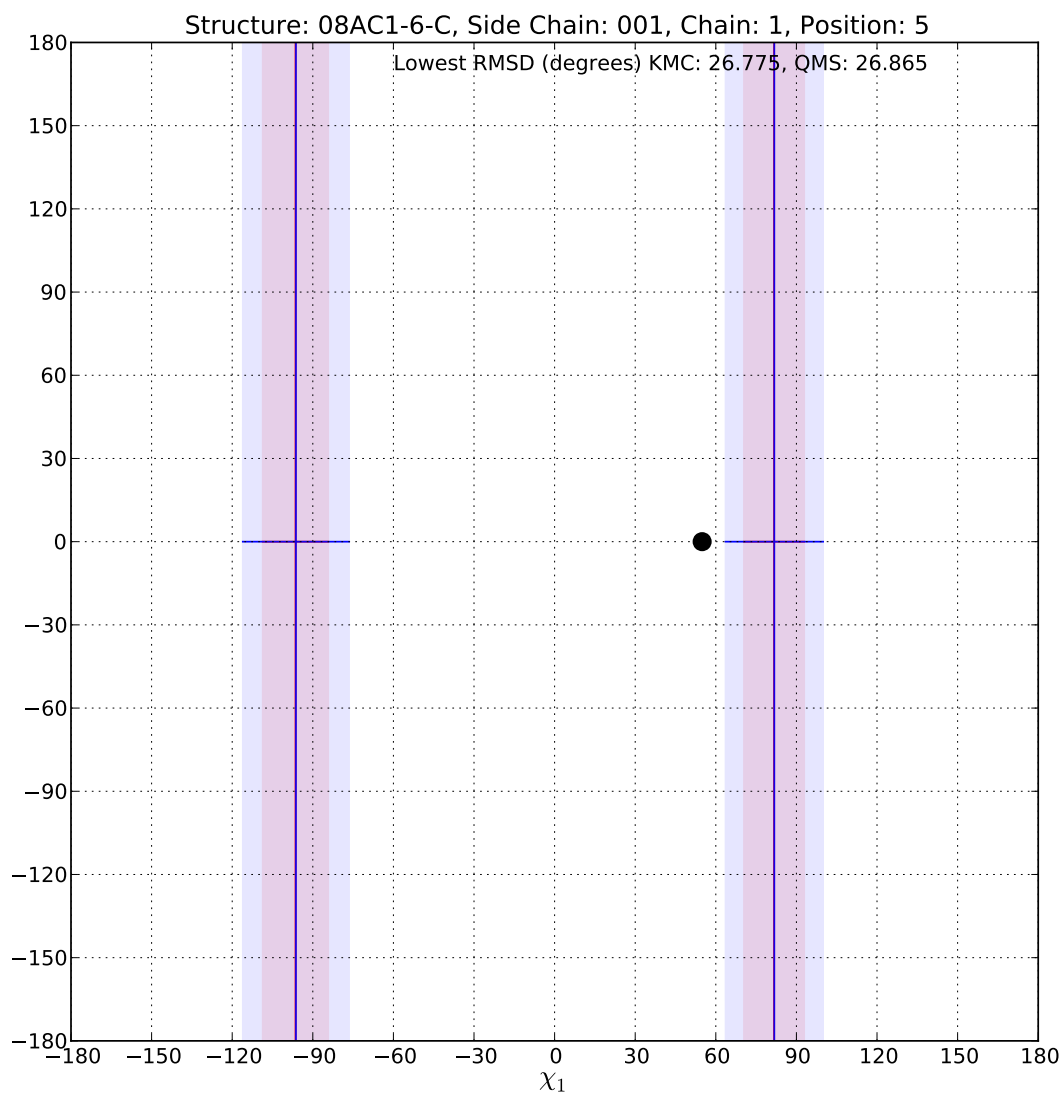

Figure S56: The rotamer library coverage plot for residue number 5 in chain 1 of peptoid databank structure 08AC1-6-C. Interpolated rotamers from the k-means clustering (KMC) method are shown as red ellipses and rotamers for the quantum mechanically-seeded (QMS) method are shown in blue. Experimental values shown as black circles.

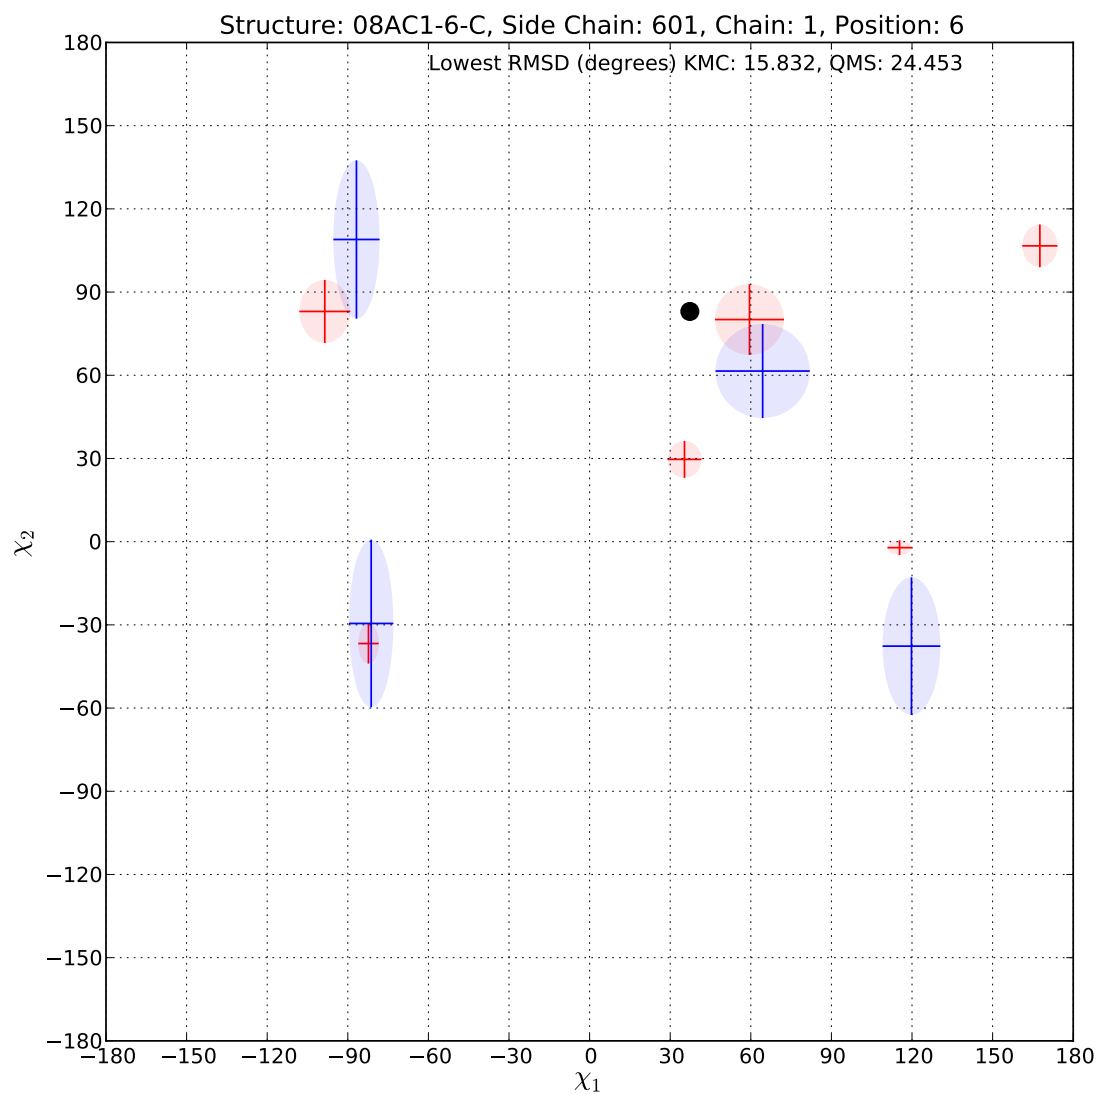

Figure S57: The rotamer library coverage plot for residue number 6 in chain 1 of peptoid databank structure 08AC1-6-C. Interpolated rotamers from the k-means clustering (KMC) method are shown as red ellipses and rotamers for the quantum mechanically-seeded (QMS) method are shown in blue. Experimental values shown as black circles.

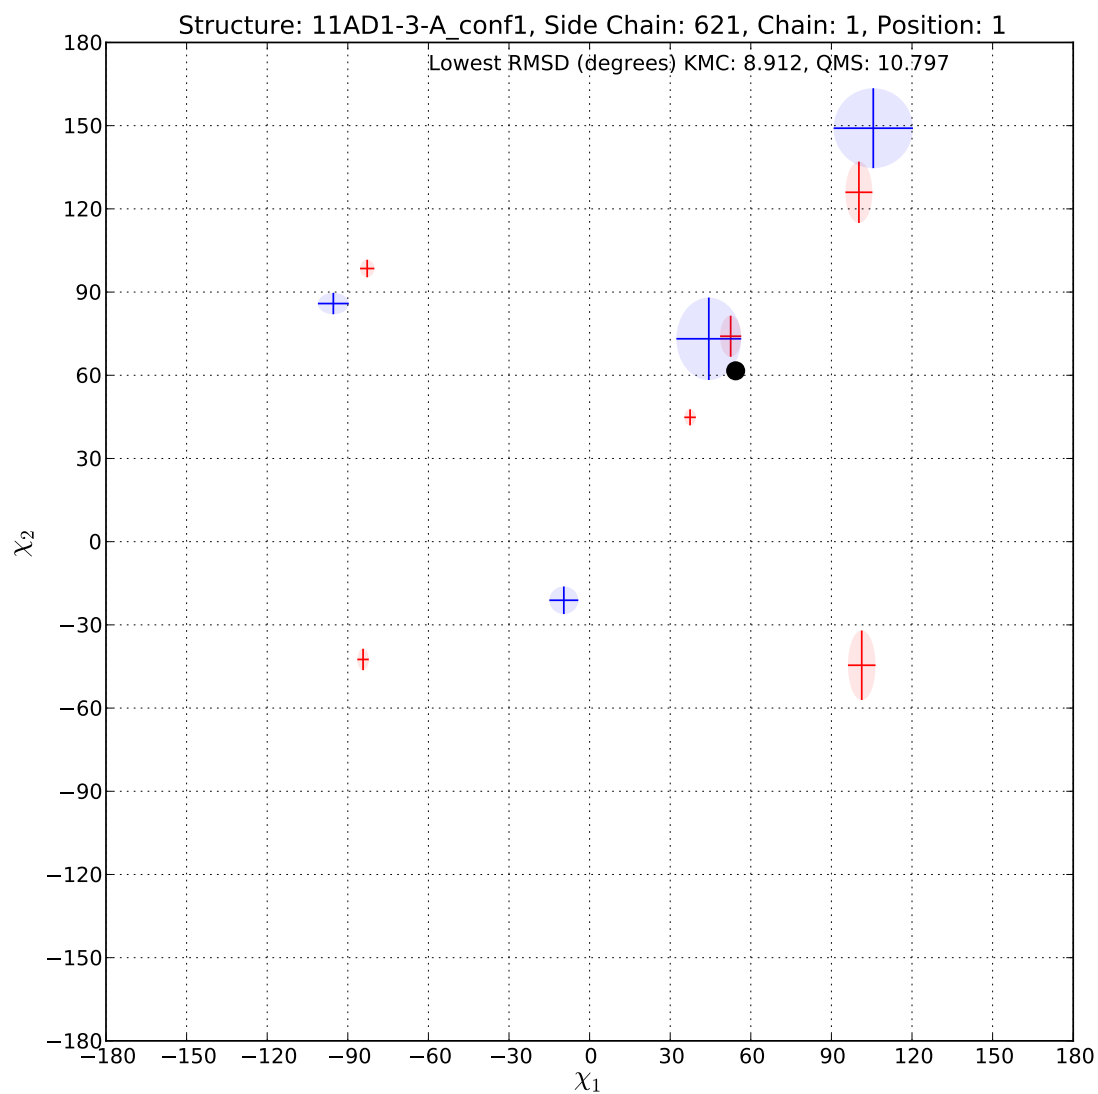

Figure S58: The rotamer library coverage plot for residue number 1 in chain 1 of peptoid databank structure 11AD1-3-A\_conf1. Interpolated rotamers from the k-means clustering (KMC) method are shown as red ellipses and rotamers for the quantum mechanically-seeded (QMS) method are shown in blue. Experimental values shown as black circles.

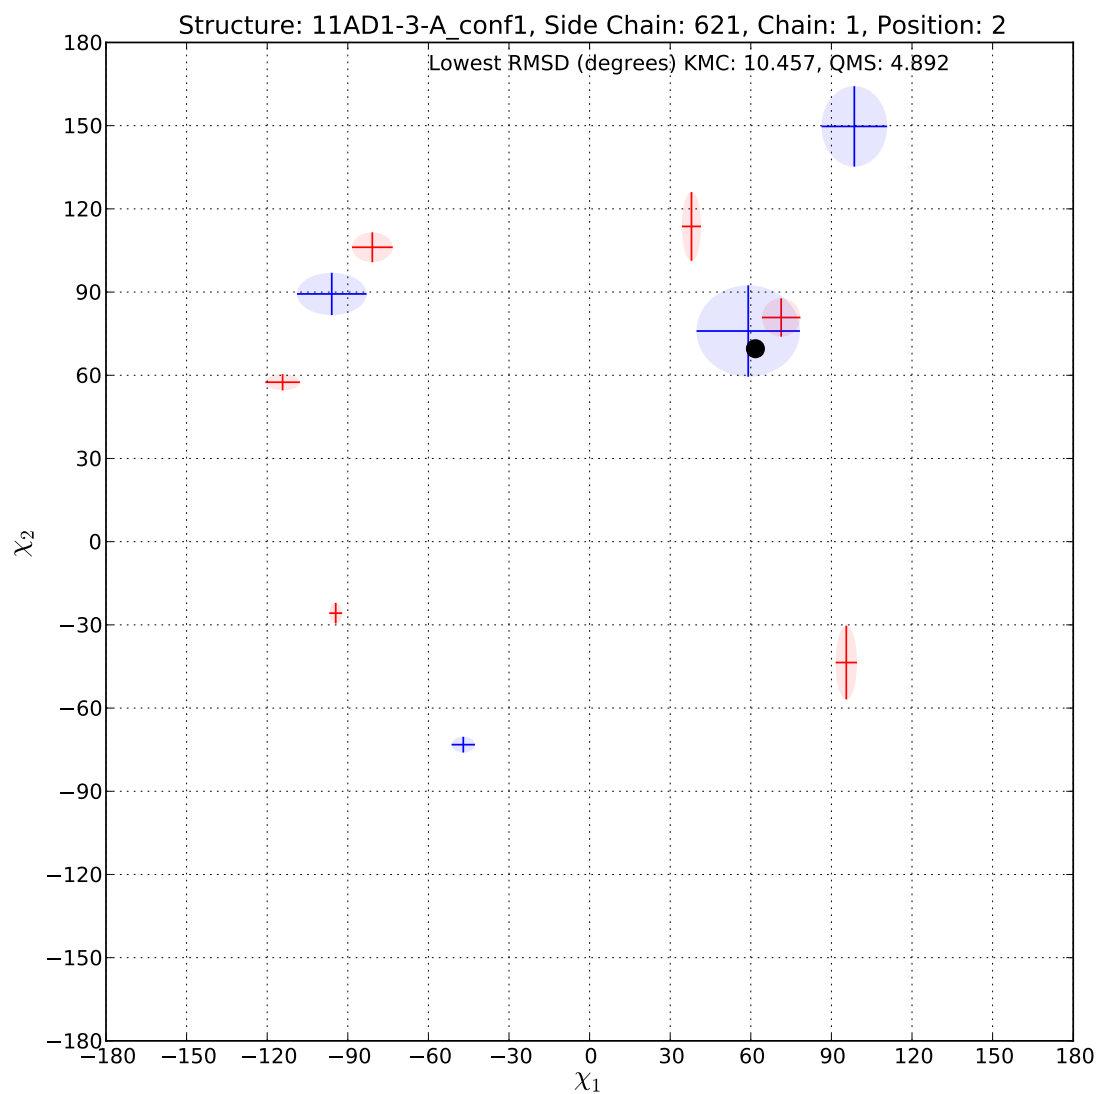

Figure S59: The rotamer library coverage plot for residue number 2 in chain 1 of peptoid databank structure 11AD1-3-A\_conf1. Interpolated rotamers from the k-means clustering (KMC) method are shown as red ellipses and rotamers for the quantum mechanically-seeded (QMS) method are shown in blue. Experimental values shown as black circles.

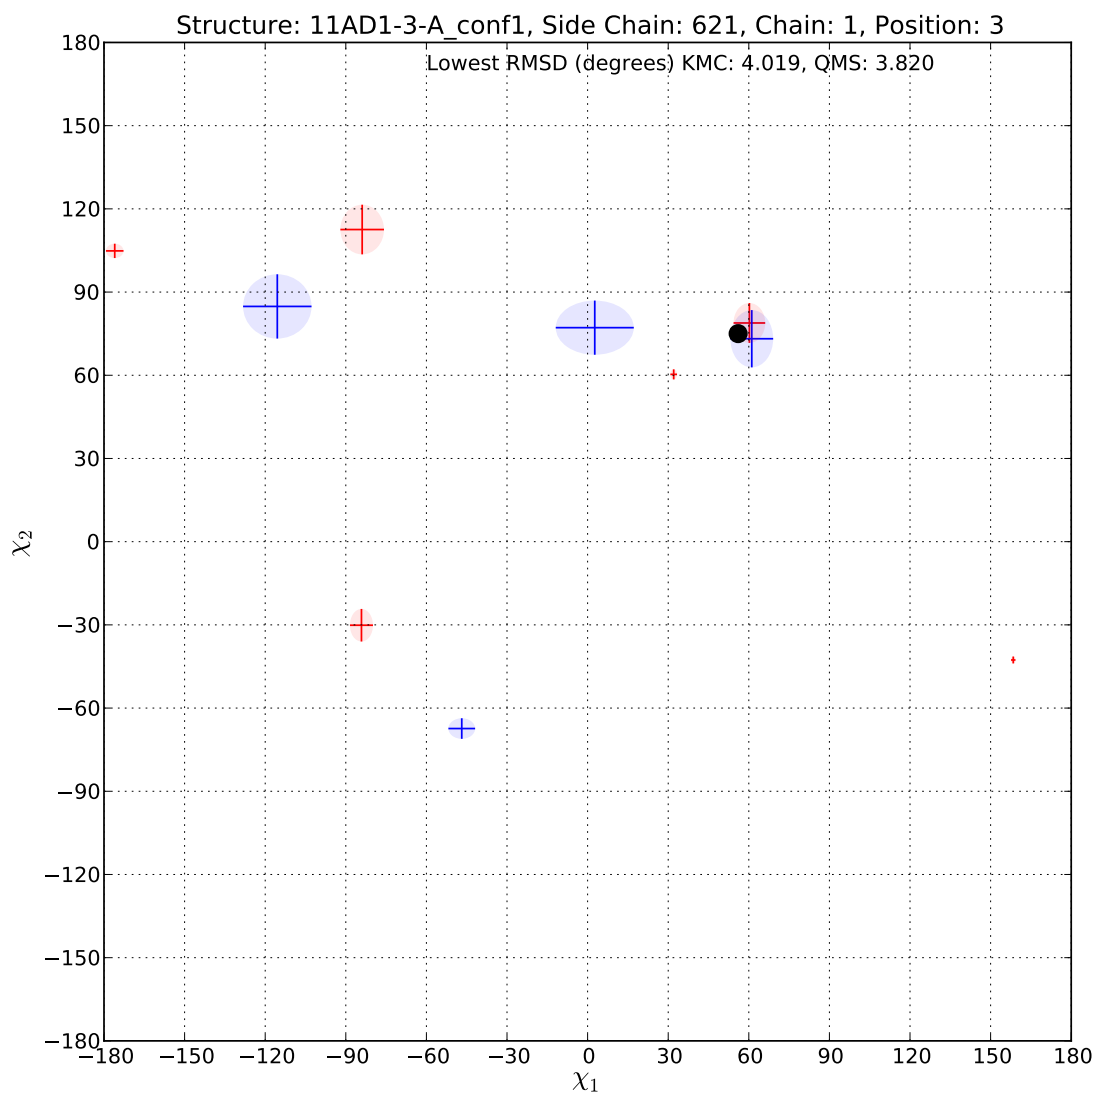

Figure S60: The rotamer library coverage plot for residue number 3 in chain 1 of peptoid databank structure 11AD1-3-A\_conf1. Interpolated rotamers from the k-means clustering (KMC) method are shown as red ellipses and rotamers for the quantum mechanically-seeded (QMS) method are shown in blue. Experimental values shown as black circles.

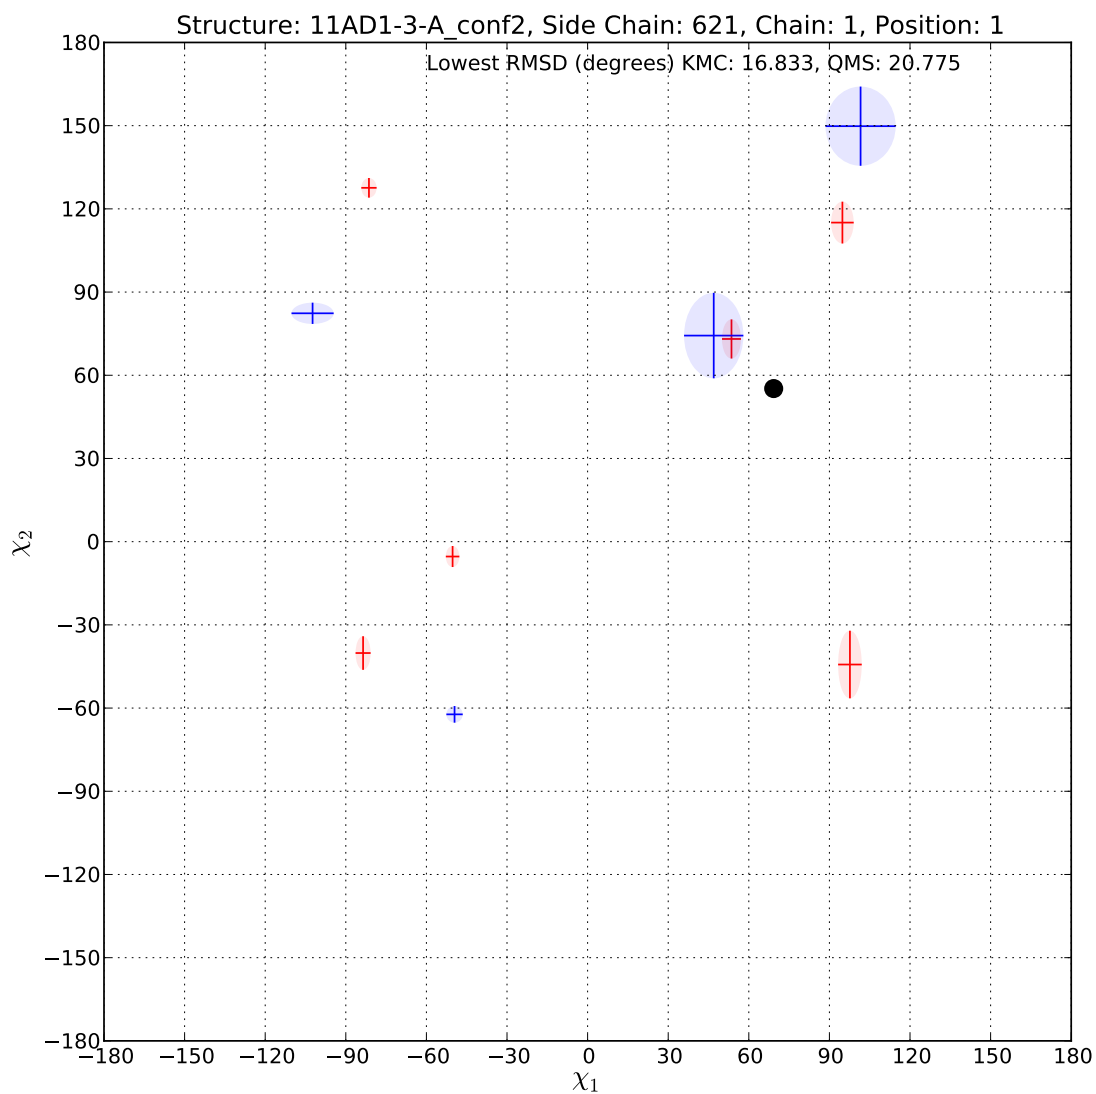

Figure S61: The rotamer library coverage plot for residue number 1 in chain 1 of peptoid databank structure 11AD1-3-A\_conf2. Interpolated rotamers from the k-means clustering (KMC) method are shown as red ellipses and rotamers for the quantum mechanically-seeded (QMS) method are shown in blue. Experimental values shown as black circles.

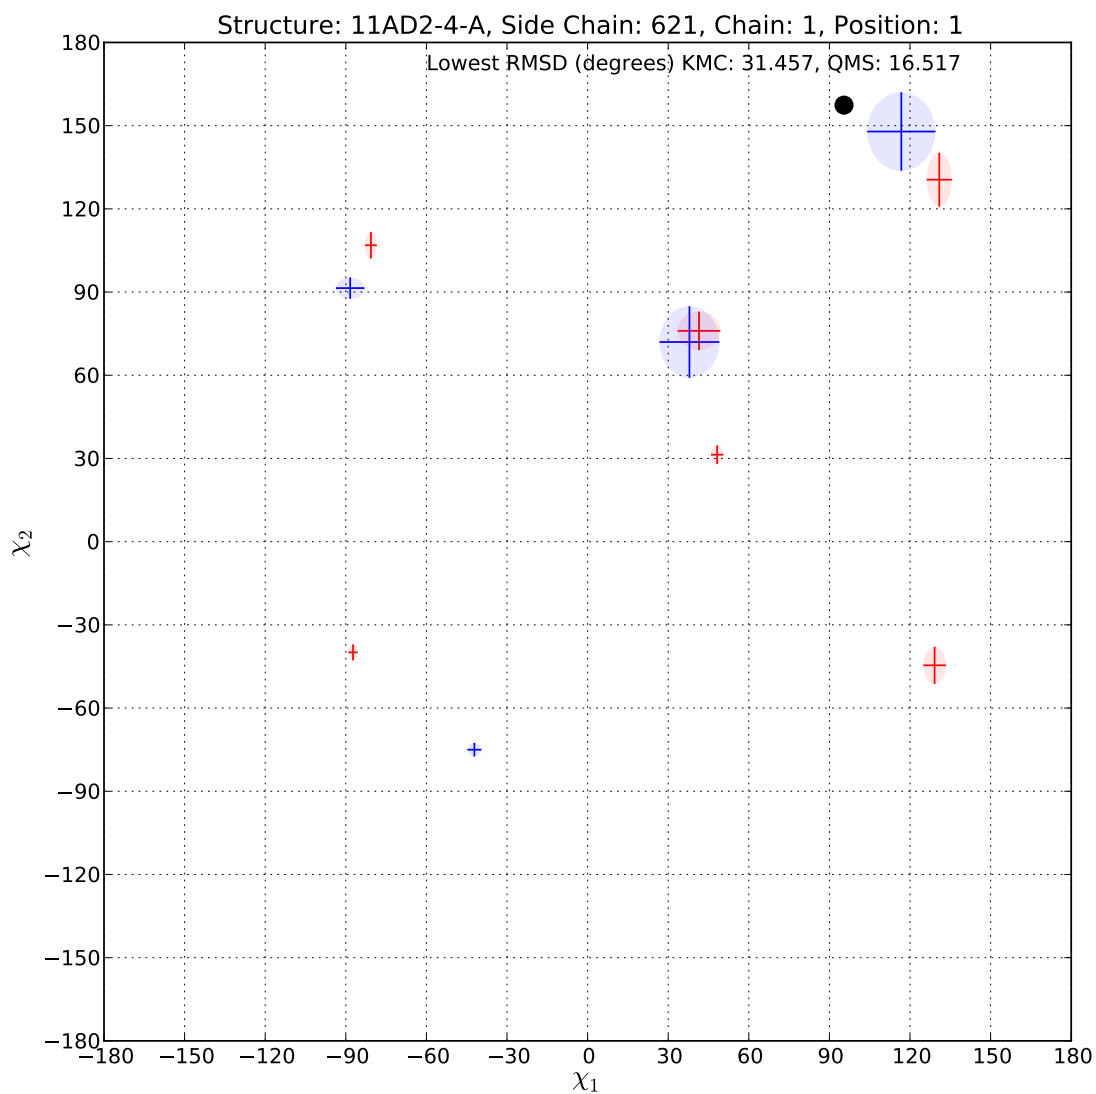

Figure S62: The rotamer library coverage plot for residue number 1 in chain 1 of peptoid databank structure 11AD2-4-A. Interpolated rotamers from the k-means clustering (KMC) method are shown as red ellipses and rotamers for the quantum mechanically-seeded (QMS) method are shown in blue. Experimental values shown as black circles.



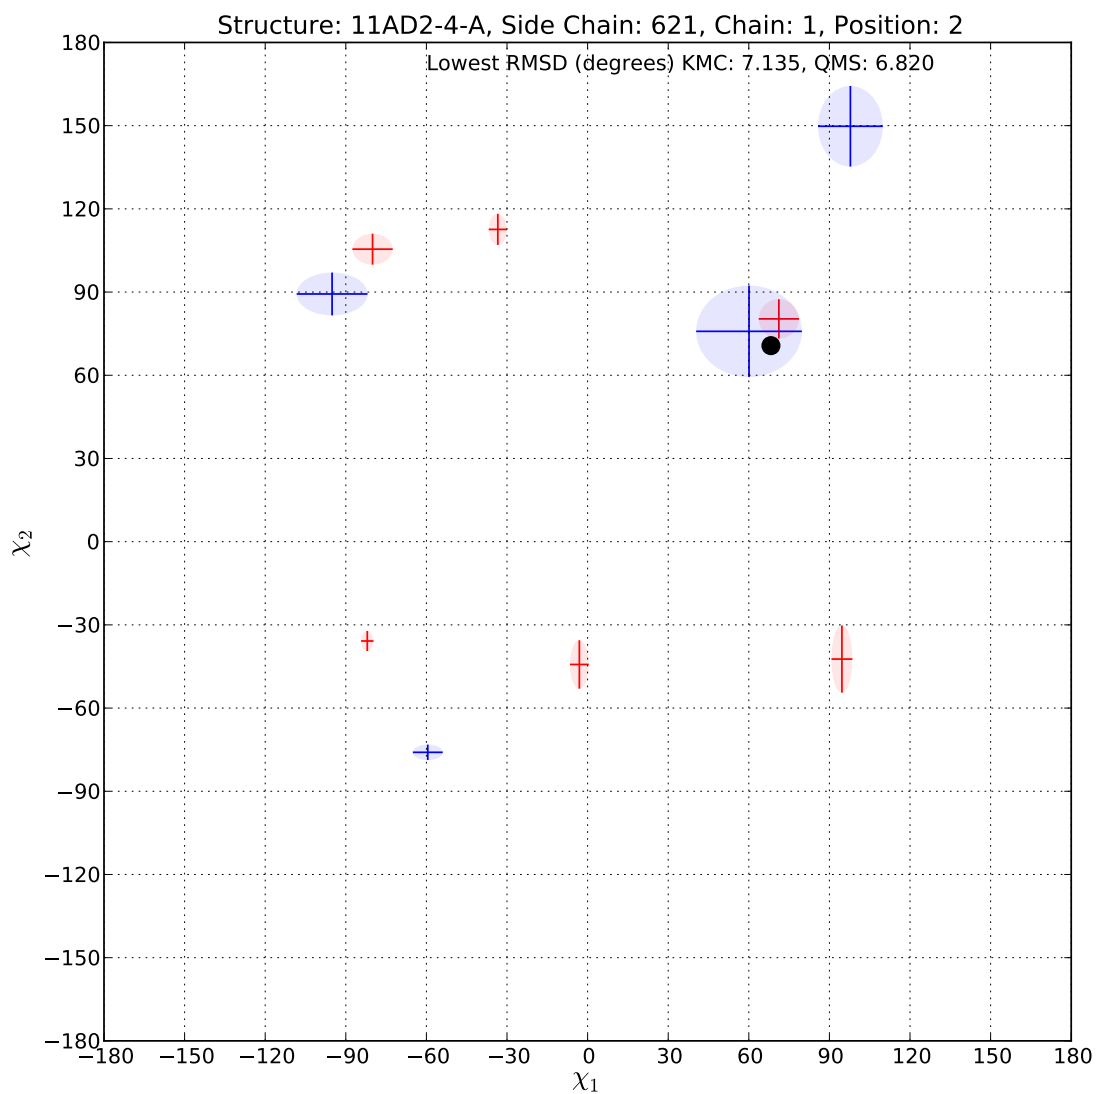

Figure S63: The rotamer library coverage plot for residue number 2 in chain 1 of peptoid databank structure 11AD2-4-A. Interpolated rotamers from the k-means clustering (KMC) method are shown as red ellipses and rotamers for the quantum mechanically-seeded (QMS) method are shown in blue. Experimental values shown as black circles.

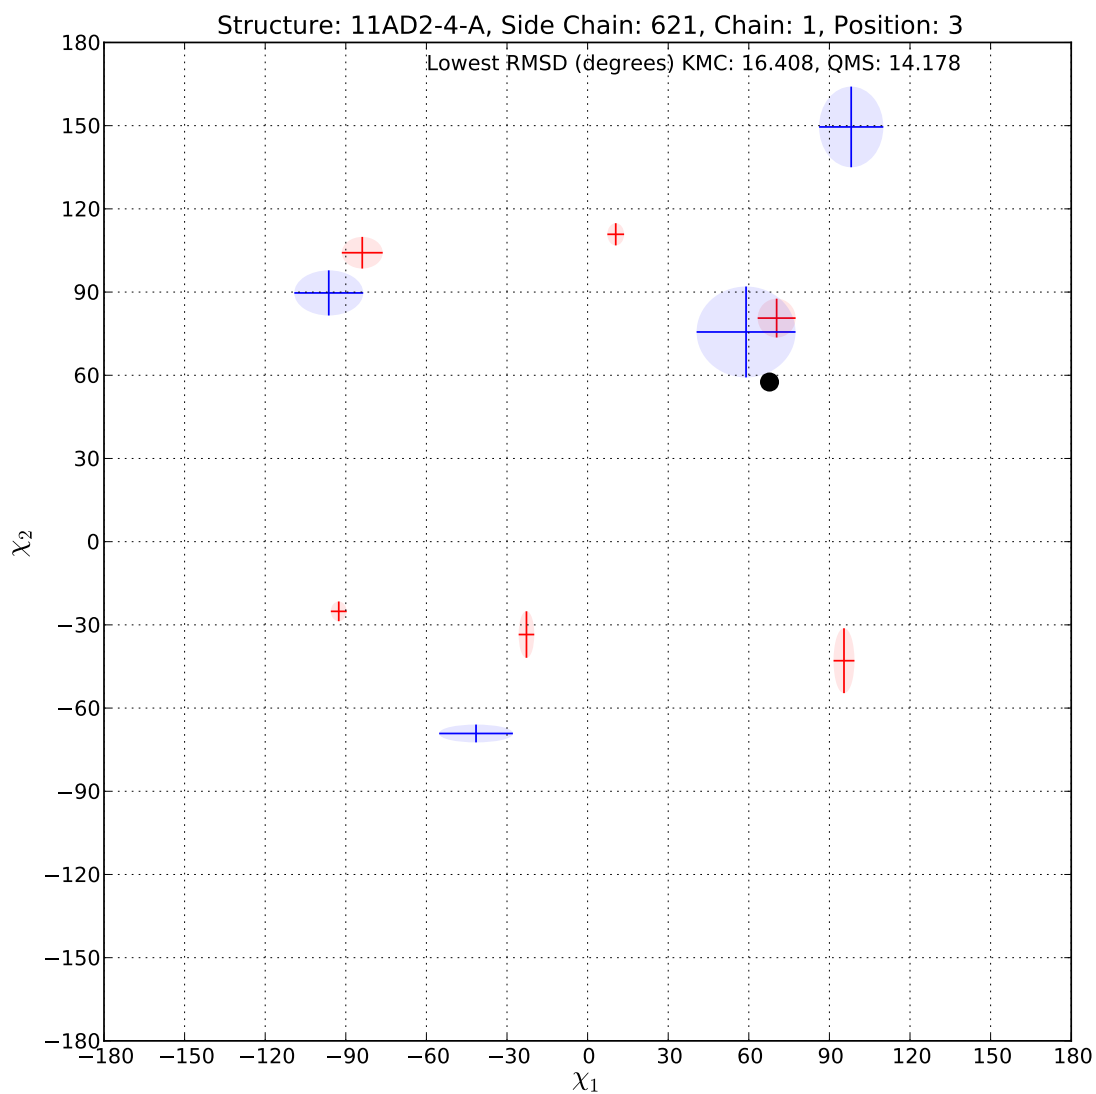

Figure S64: The rotamer library coverage plot for residue number 3 in chain 1 of peptoid databank structure 11AD2-4-A. Interpolated rotamers from the k-means clustering (KMC) method are shown as red ellipses and rotamers for the quantum mechanically-seeded (QMS) method are shown in blue. Experimental values shown as black circles.

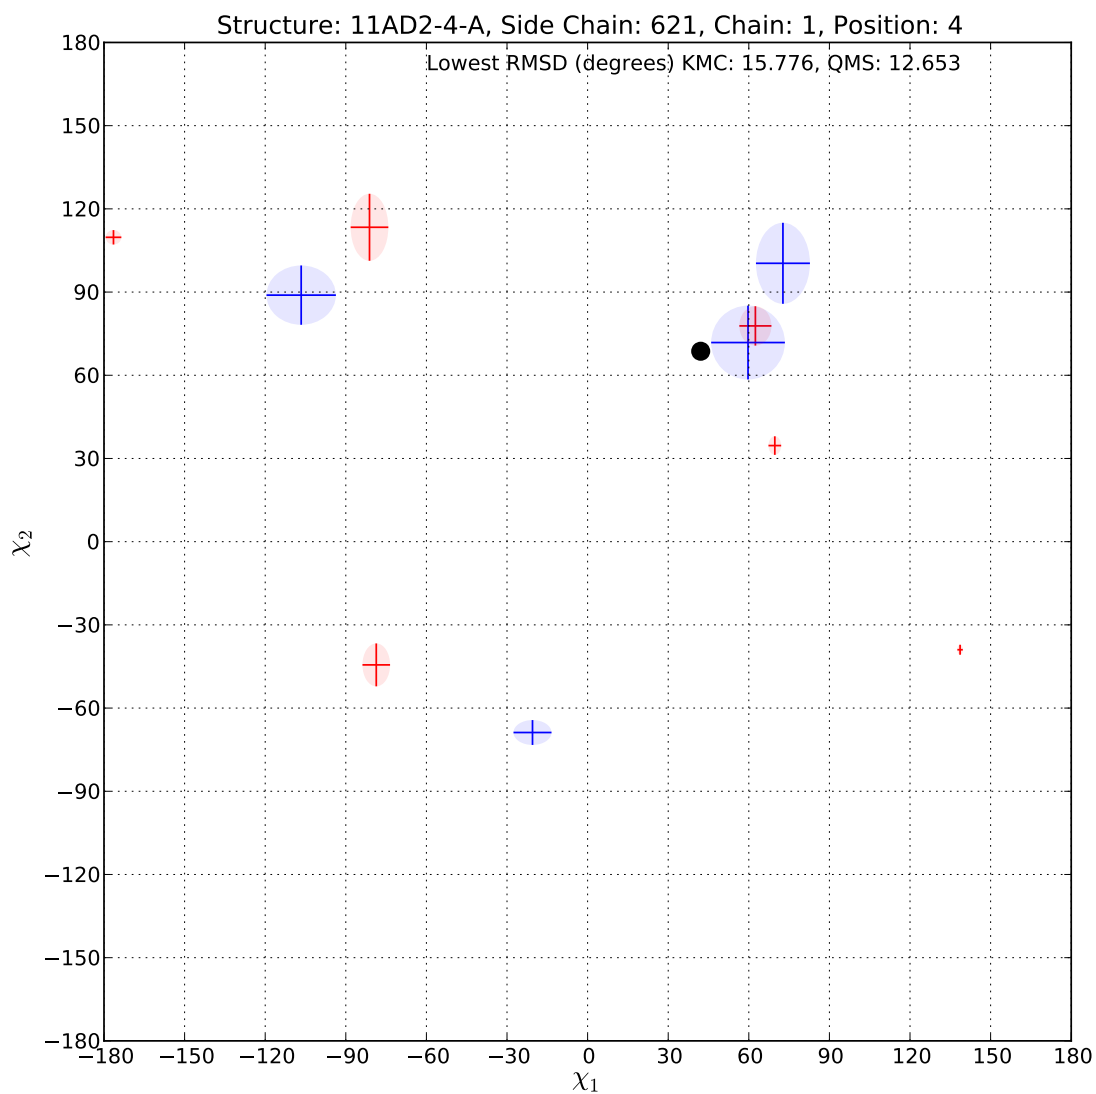

Figure S65: The rotamer library coverage plot for residue number 4 in chain 1 of peptoid databank structure 11AD2-4-A. Interpolated rotamers from the k-means clustering (KMC) method are shown as red ellipses and rotamers for the quantum mechanically-seeded (QMS) method are shown in blue. Experimental values shown as black circles.

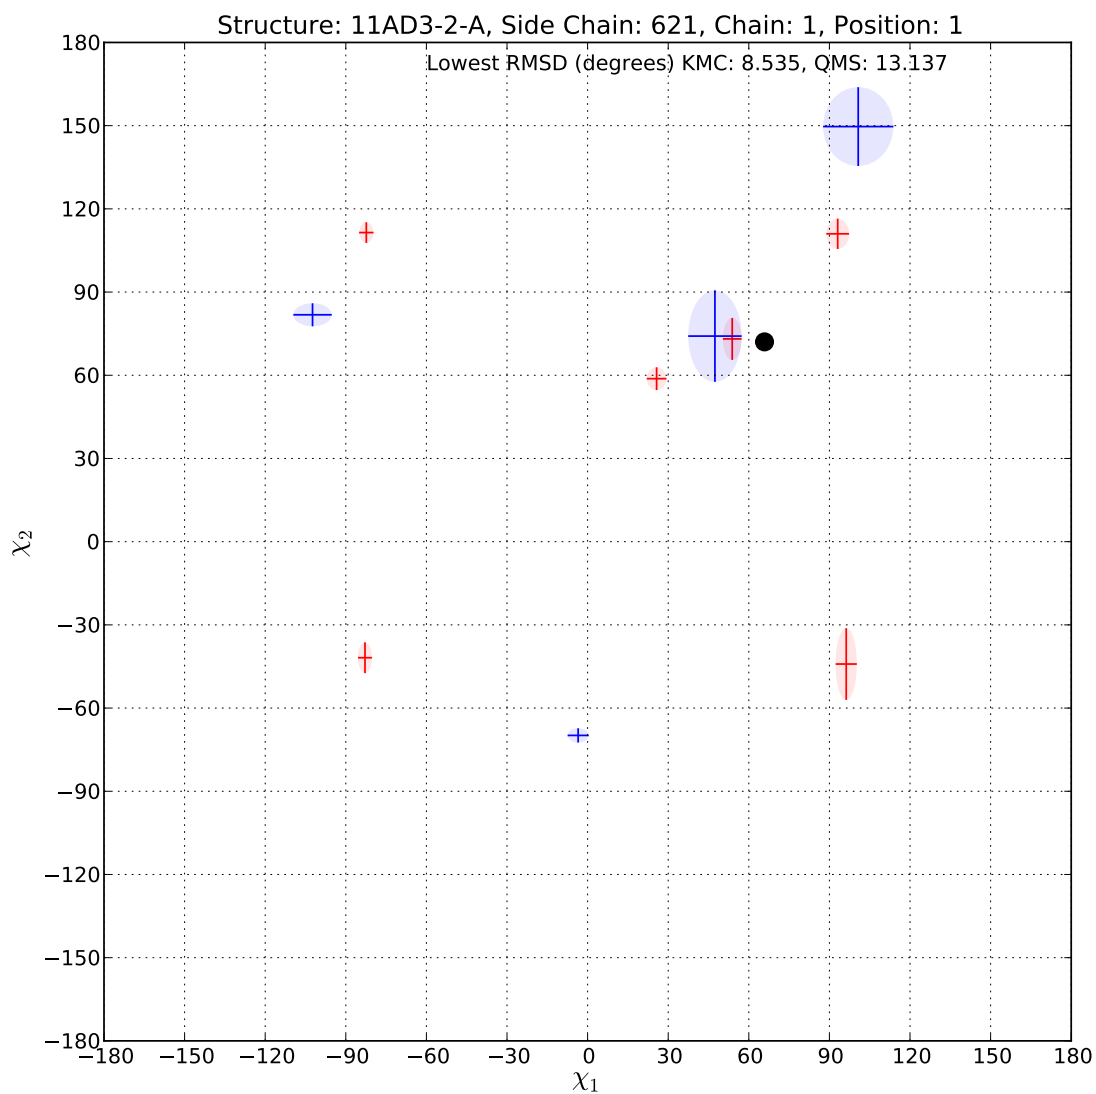

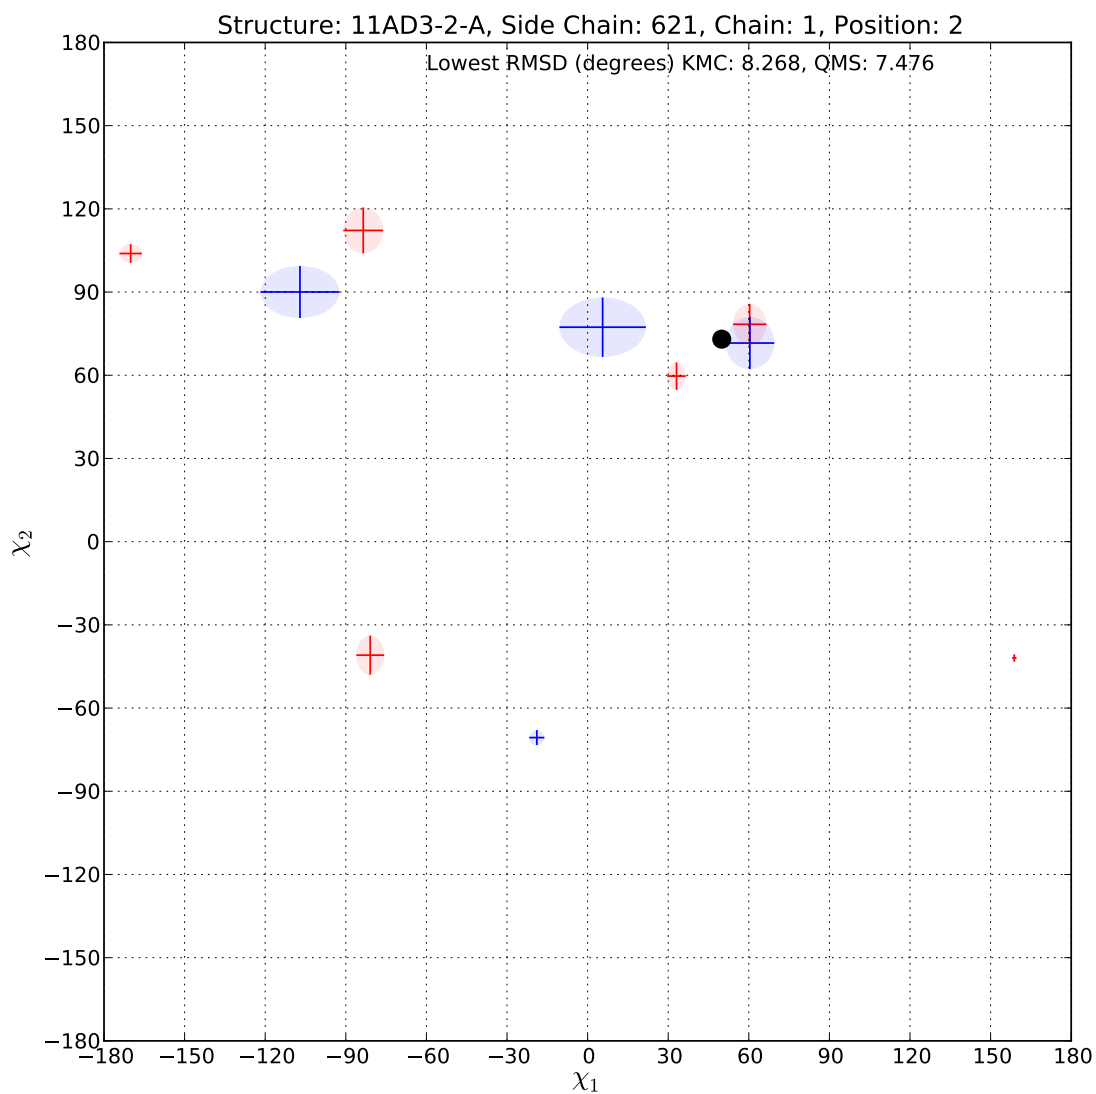

Figure S67: The rotamer library coverage plot for residue number 2 in chain 1 of peptoid databank structure 11AD3-2-A. Interpolated rotamers from the k-means clustering (KMC) method are shown as red ellipses and rotamers for the quantum mechanically-seeded (QMS) method are shown in blue. Experimental values shown as black circles.

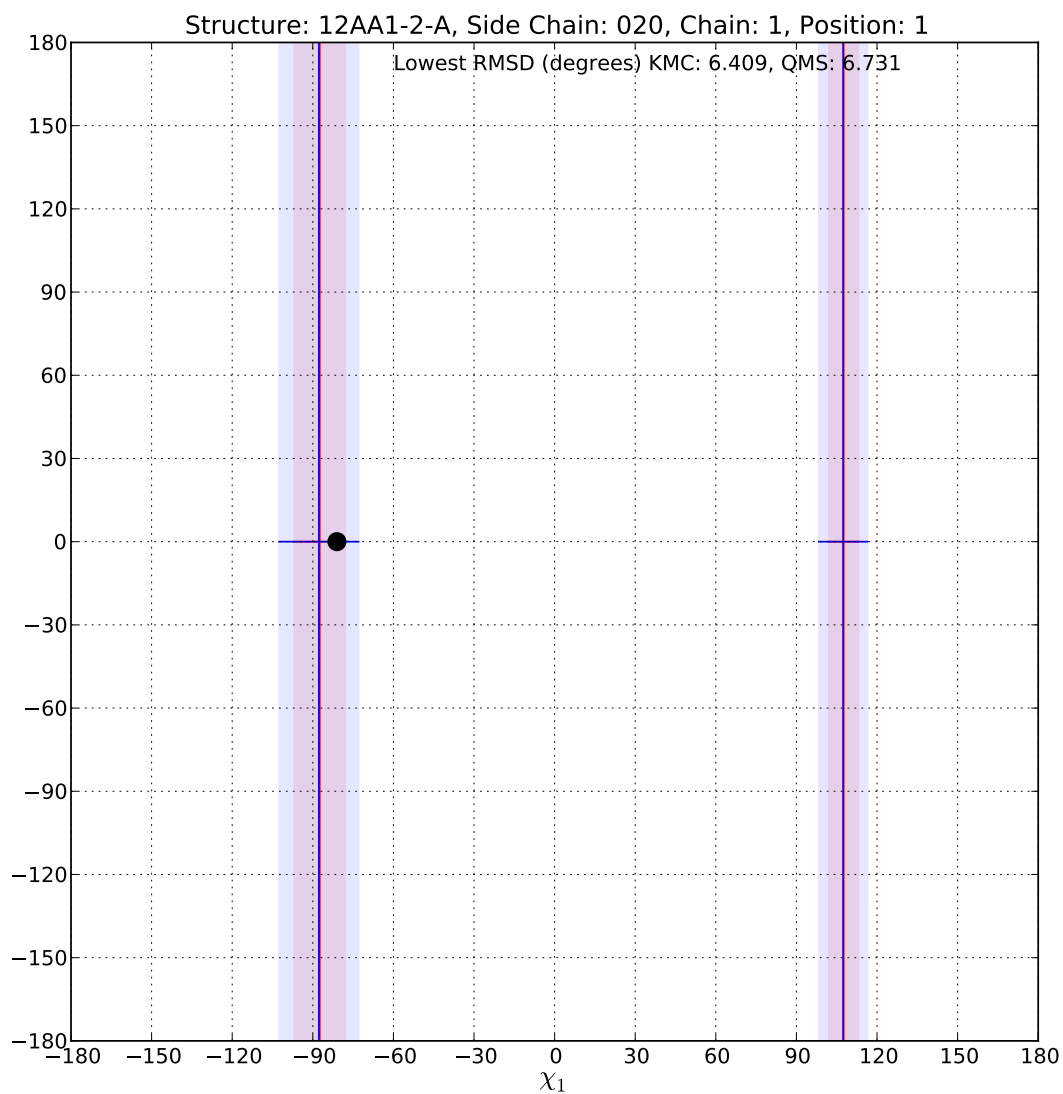

Figure S68: The rotamer library coverage plot for residue number 1 in chain 1 of peptoid databank structure 12AA1-2-A. Interpolated rotamers from the k-means clustering (KMC) method are shown as red ellipses and rotamers for the quantum mechanically-seeded (QMS) method are shown in blue. Experimental values shown as black circles.

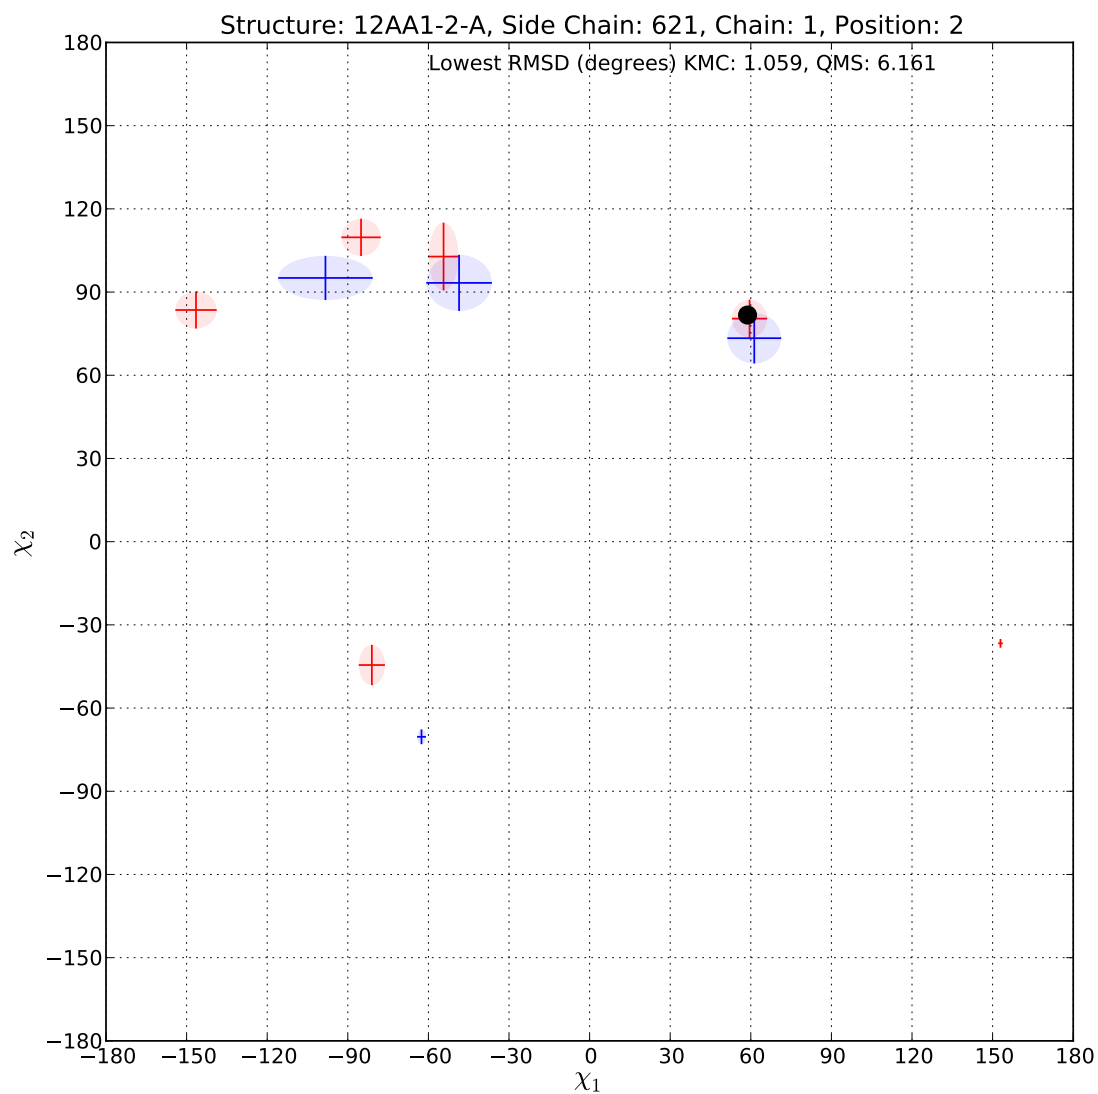

Figure S69: The rotamer library coverage plot for residue number 2 in chain 1 of peptoid databank structure 12AA1-2-A. Interpolated rotamers from the k-means clustering (KMC) method are shown as red ellipses and rotamers for the quantum mechanically-seeded (QMS) method are shown in blue. Experimental values shown as black circles.

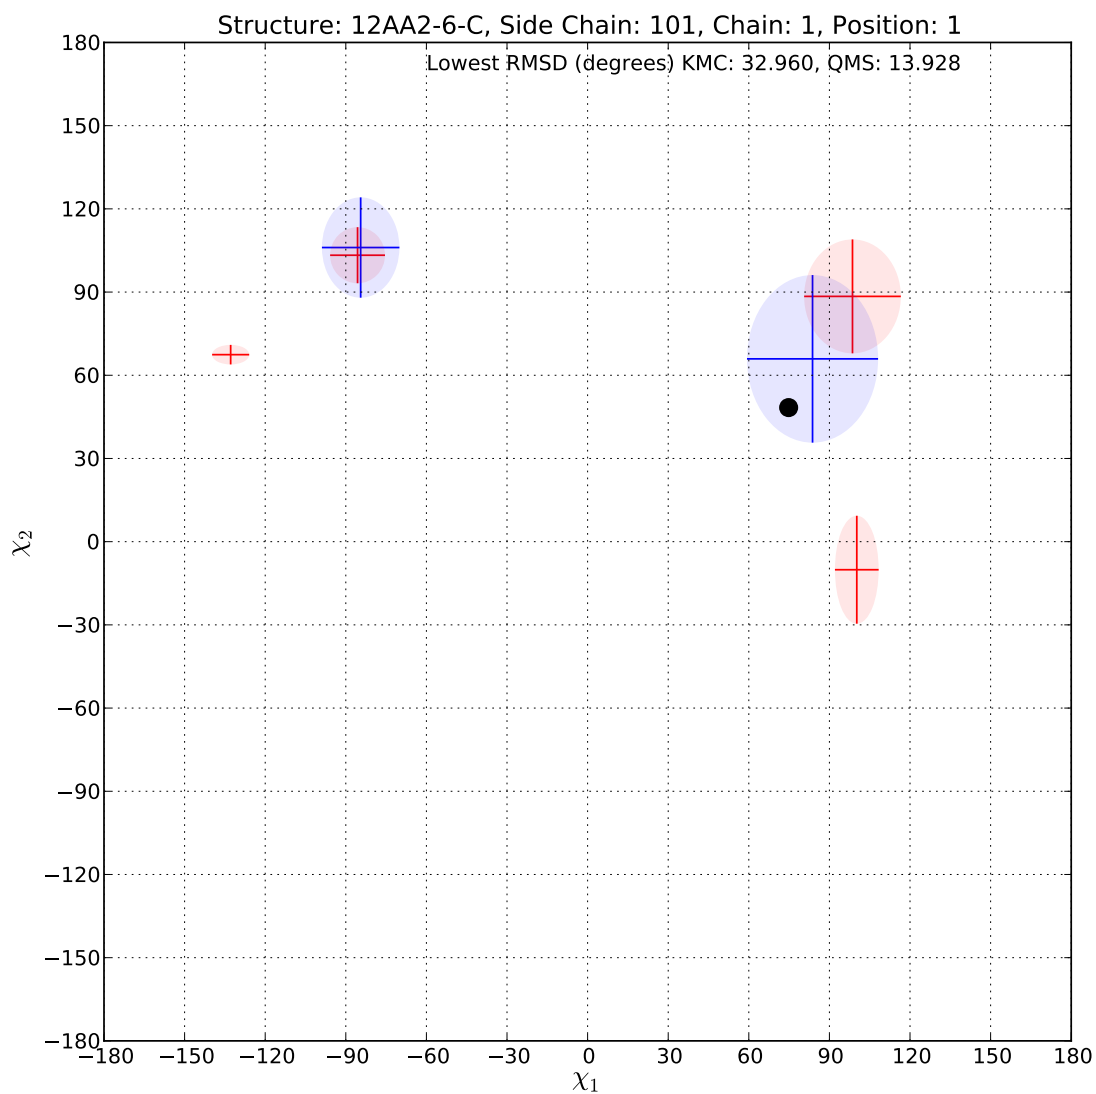

Figure S70: The rotamer library coverage plot for residue number 1 in chain 1 of peptoid databank structure 12AA2-6-C. Interpolated rotamers from the k-means clustering (KMC) method are shown as red ellipses and rotamers for the quantum mechanically-seeded (QMS) method are shown in blue. Experimental values shown as black circles.



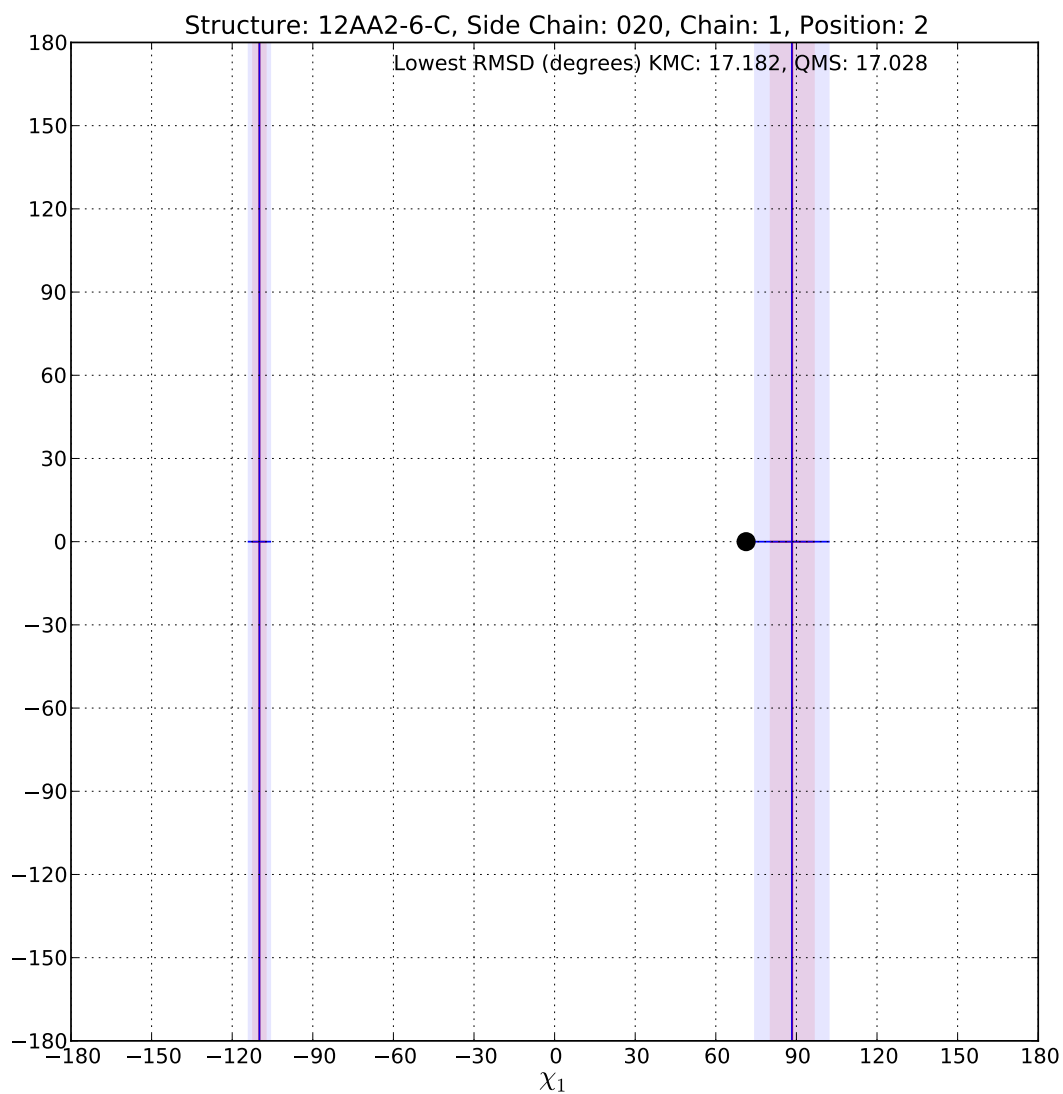

Figure S71: The rotamer library coverage plot for residue number 2 in chain 1 of peptoid databank structure 12AA2-6-C. Interpolated rotamers from the k-means clustering (KMC) method are shown as red ellipses and rotamers for the quantum mechanically-seeded (QMS) method are shown in blue. Experimental values shown as black circles.

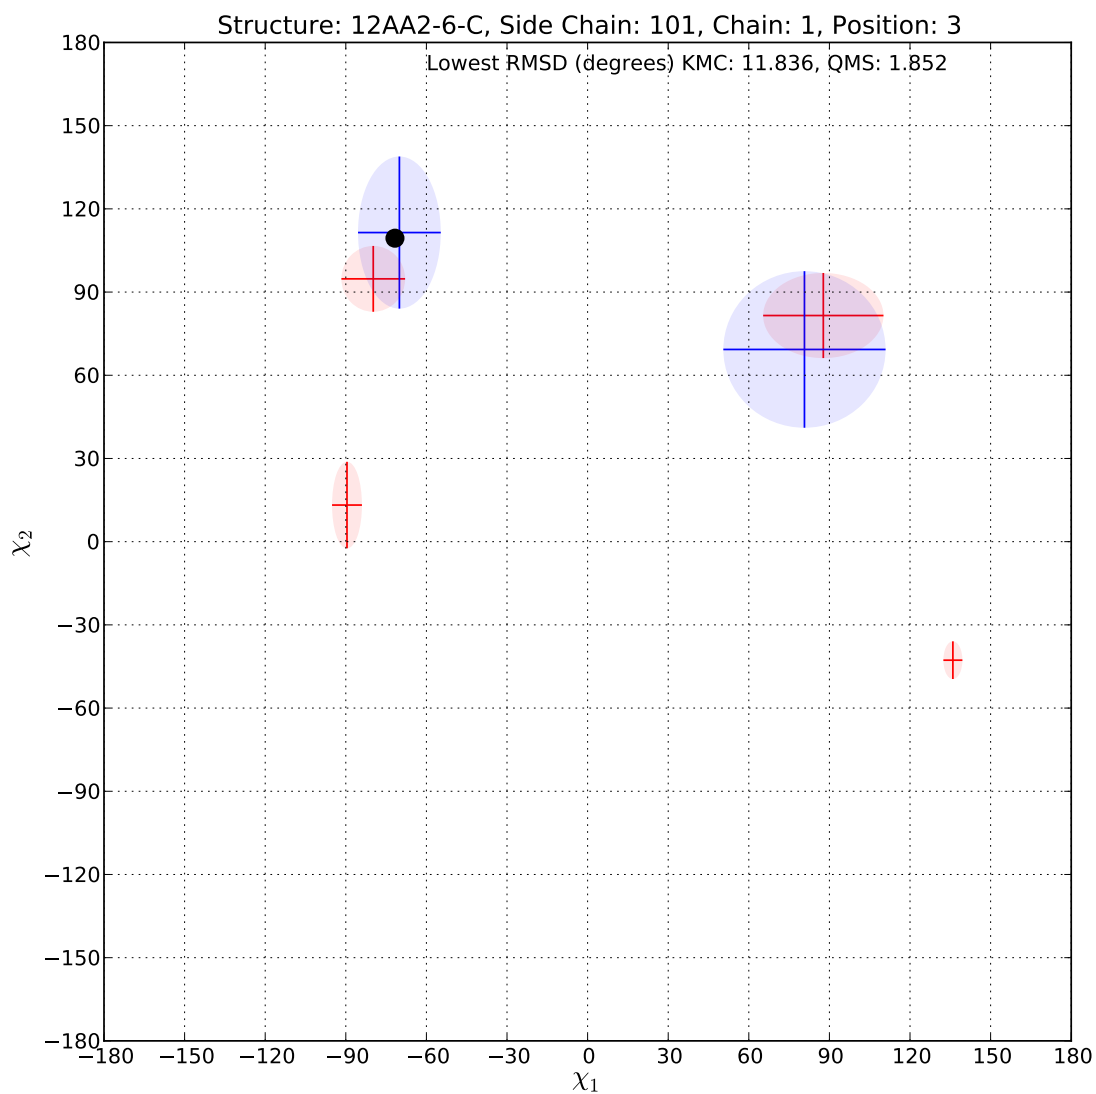

Figure S72: The rotamer library coverage plot for residue number 3 in chain 1 of peptoid databank structure 12AA2-6-C. Interpolated rotamers from the k-means clustering (KMC) method are shown as red ellipses and rotamers for the quantum mechanically-seeded (QMS) method are shown in blue. Experimental values shown as black circles.

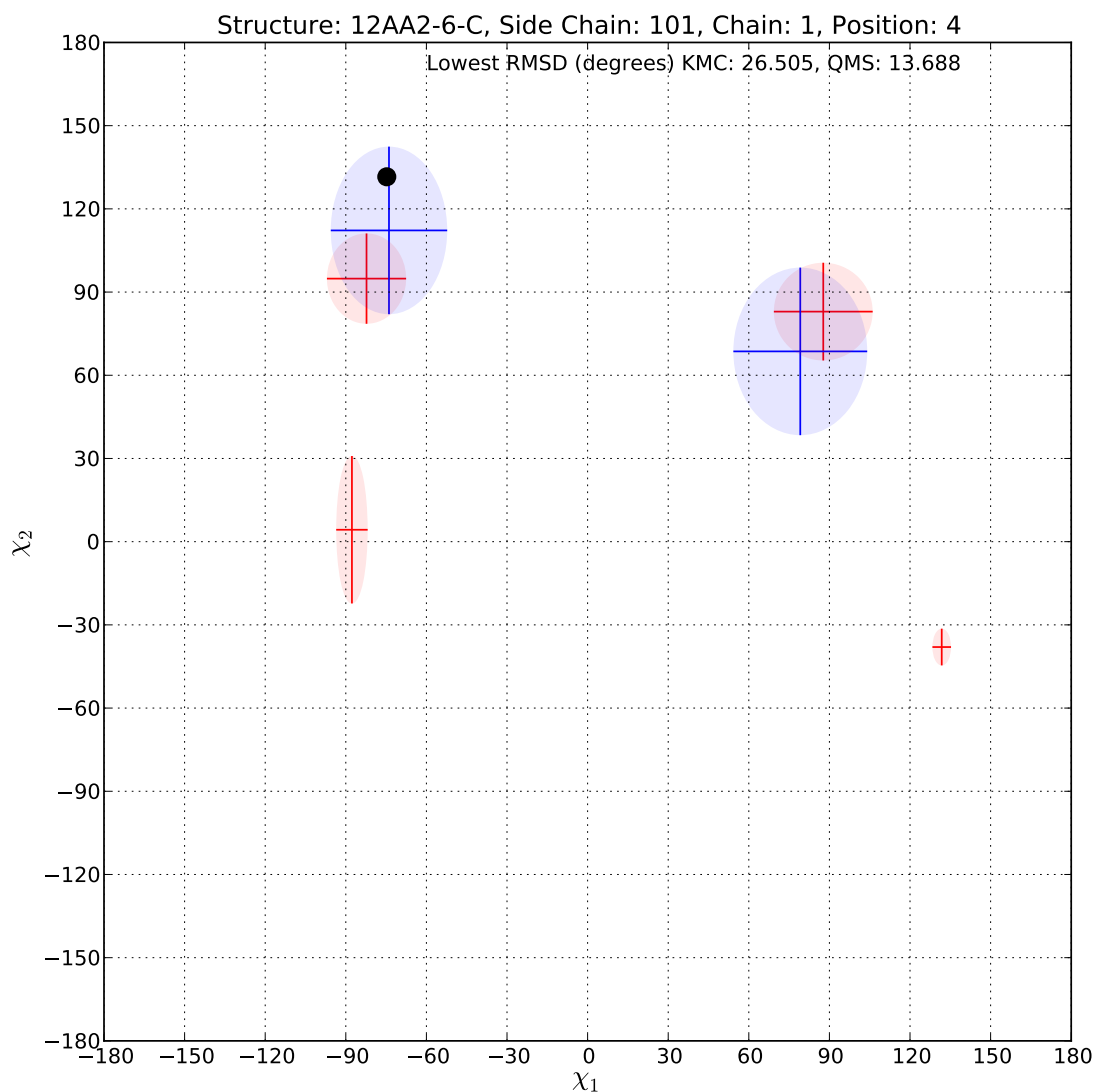

Figure S73: The rotamer library coverage plot for residue number 4 in chain 1 of peptoid databank structure 12AA2-6-C. Interpolated rotamers from the k-means clustering (KMC) method are shown as red ellipses and rotamers for the quantum mechanically-seeded (QMS) method are shown in blue. Experimental values shown as black circles.

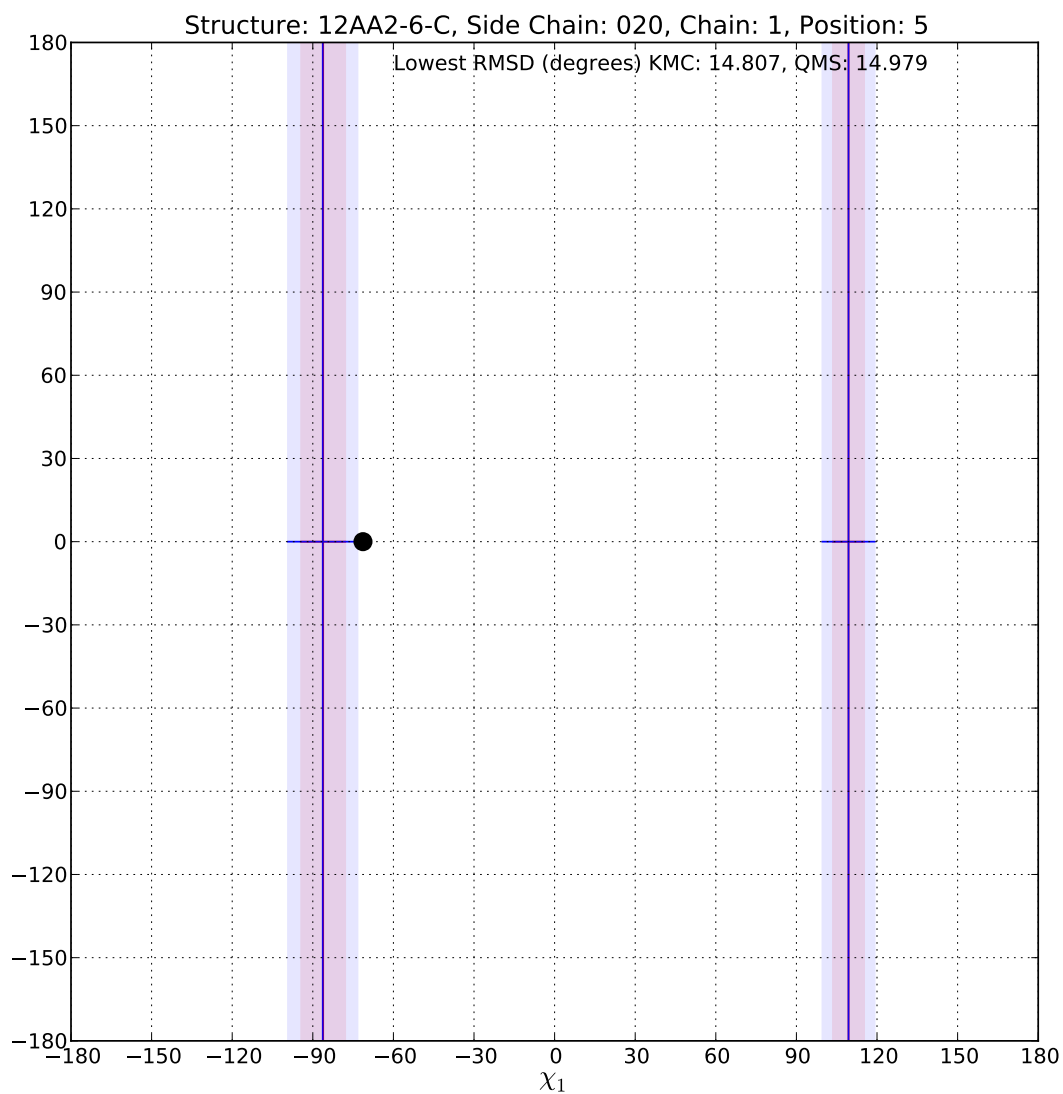

Figure S74: The rotamer library coverage plot for residue number 5 in chain 1 of peptoid databank structure 12AA2-6-C. Interpolated rotamers from the k-means clustering (KMC) method are shown as red ellipses and rotamers for the quantum mechanically-seeded (QMS) method are shown in blue. Experimental values shown as black circles.

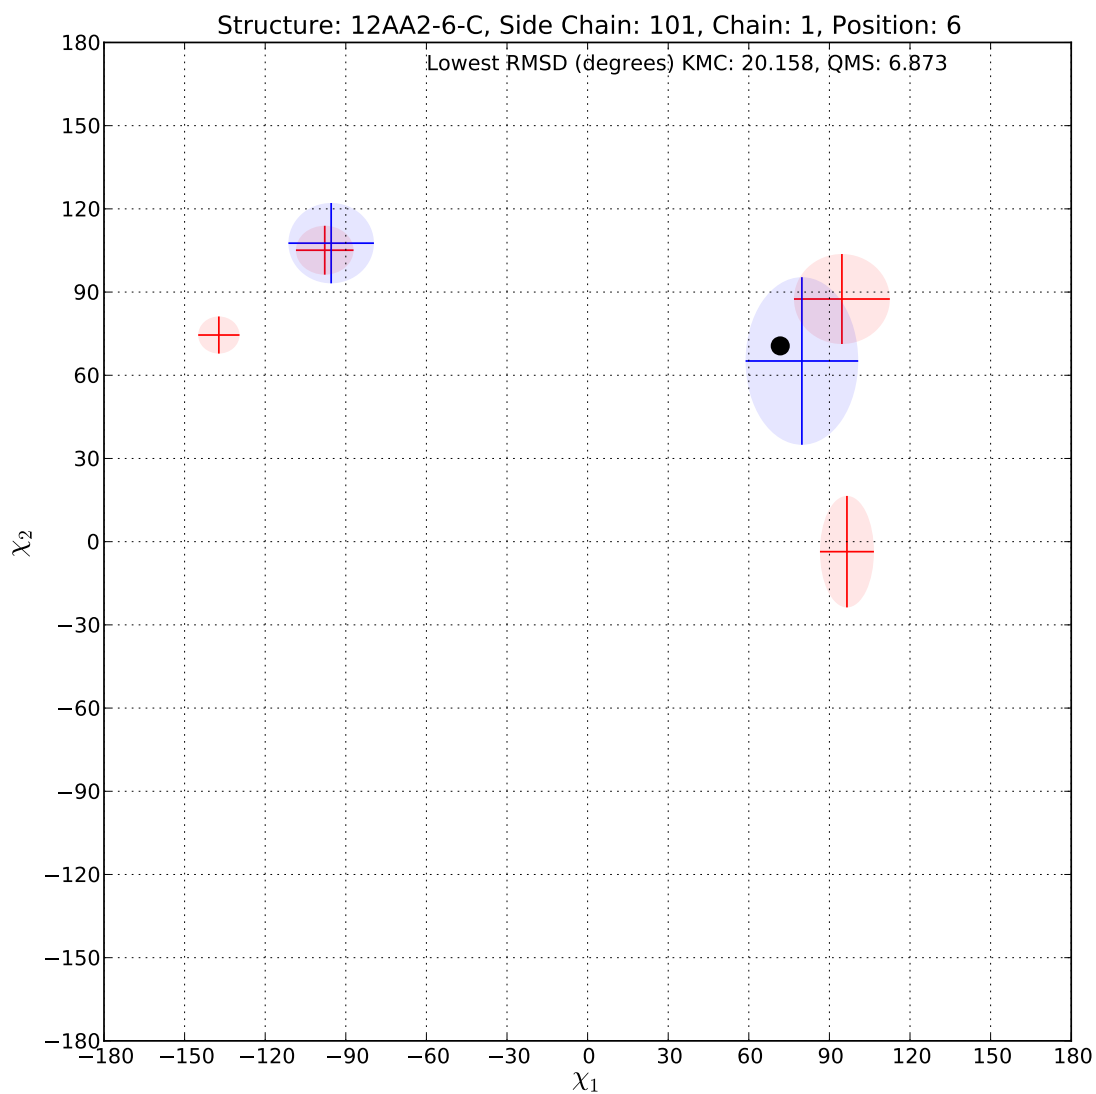

Figure S75: The rotamer library coverage plot for residue number 6 in chain 1 of peptoid databank structure 12AA2-6-C. Interpolated rotamers from the k-means clustering (KMC) method are shown as red ellipses and rotamers for the quantum mechanically-seeded (QMS) method are shown in blue. Experimental values shown as black circles.

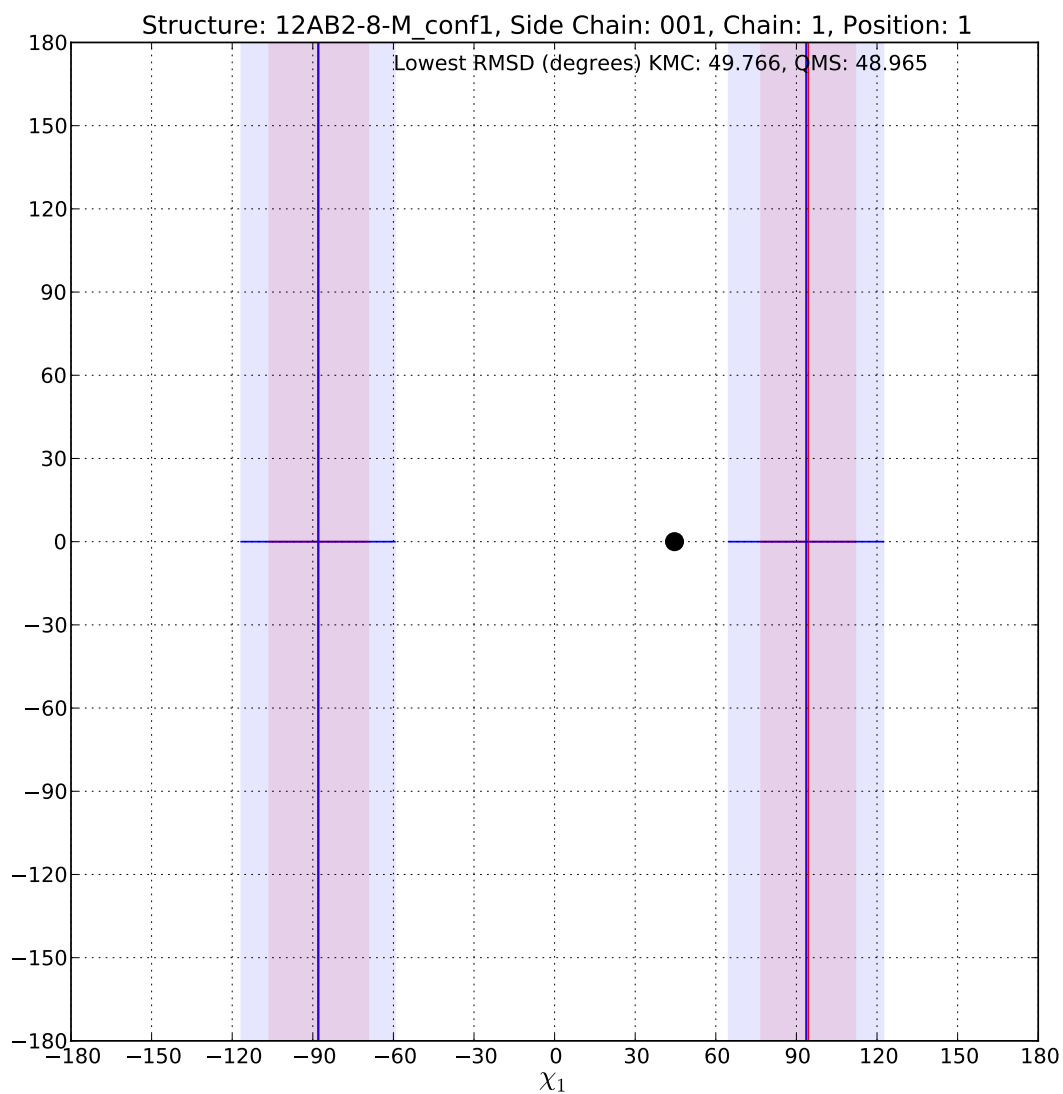

Figure S76: The rotamer library coverage plot for residue number 1 in chain 1 of peptoid databank structure 12AB2-8-M\_conf1. Interpolated rotamers from the k-means clustering (KMC) method are shown as red ellipses and rotamers for the quantum mechanically-seeded (QMS) method are shown in blue. Experimental values shown as black circles.

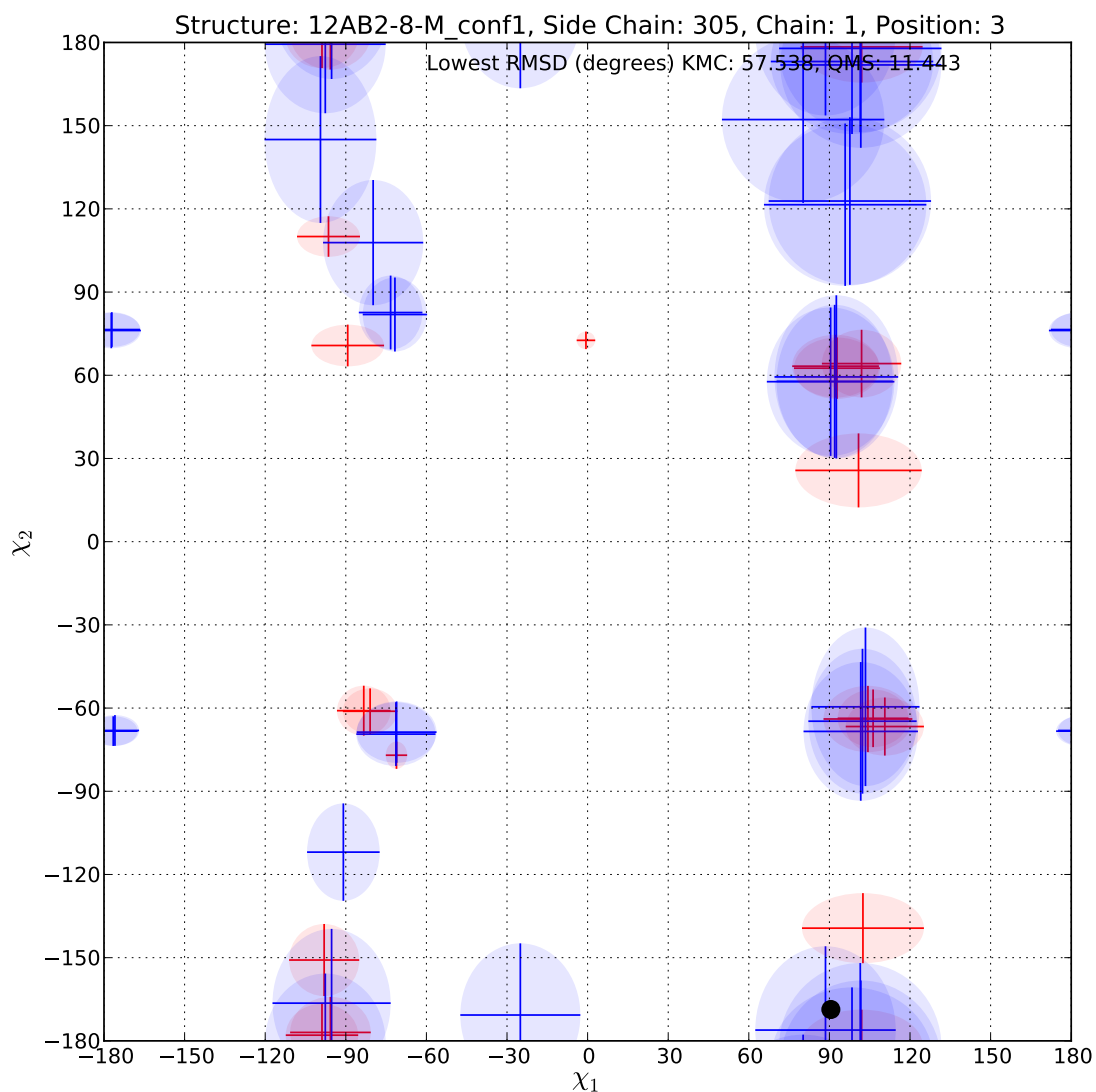

Figure S77: The rotamer library coverage plot for residue number 3 in chain 1 of peptoid databank structure 12AB2-8-M\_conf1. Interpolated rotamers from the k-means clustering (KMC) method are shown as red ellipses and rotamers for the quantum mechanically-seeded (QMS) method are shown in blue. Experimental values shown as black circles.

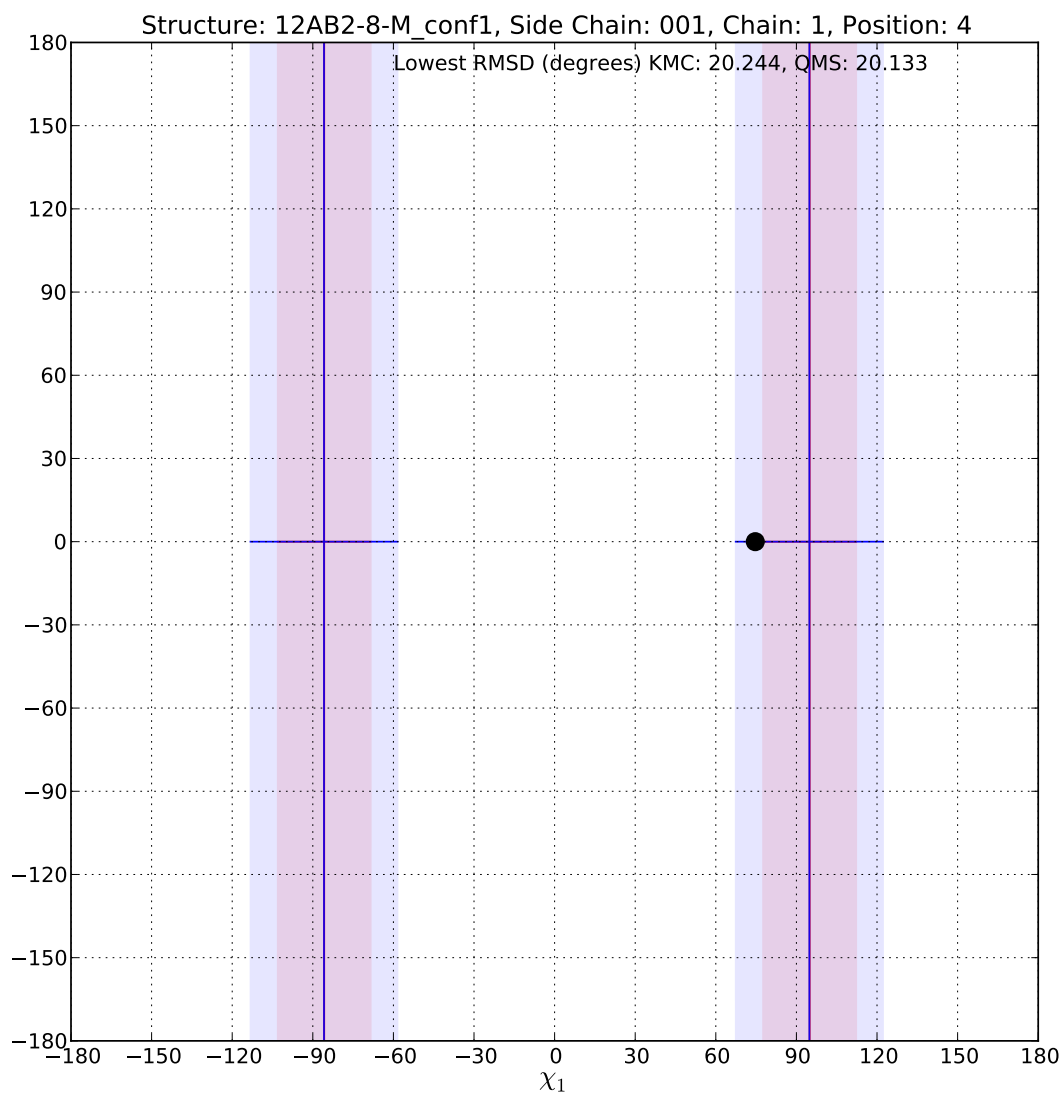

Figure S78: The rotamer library coverage plot for residue number 4 in chain 1 of peptoid databank structure 12AB2-8-M\_conf1. Interpolated rotamers from the k-means clustering (KMC) method are shown as red ellipses and rotamers for the quantum mechanically-seeded (QMS) method are shown in blue. Experimental values shown as black circles.



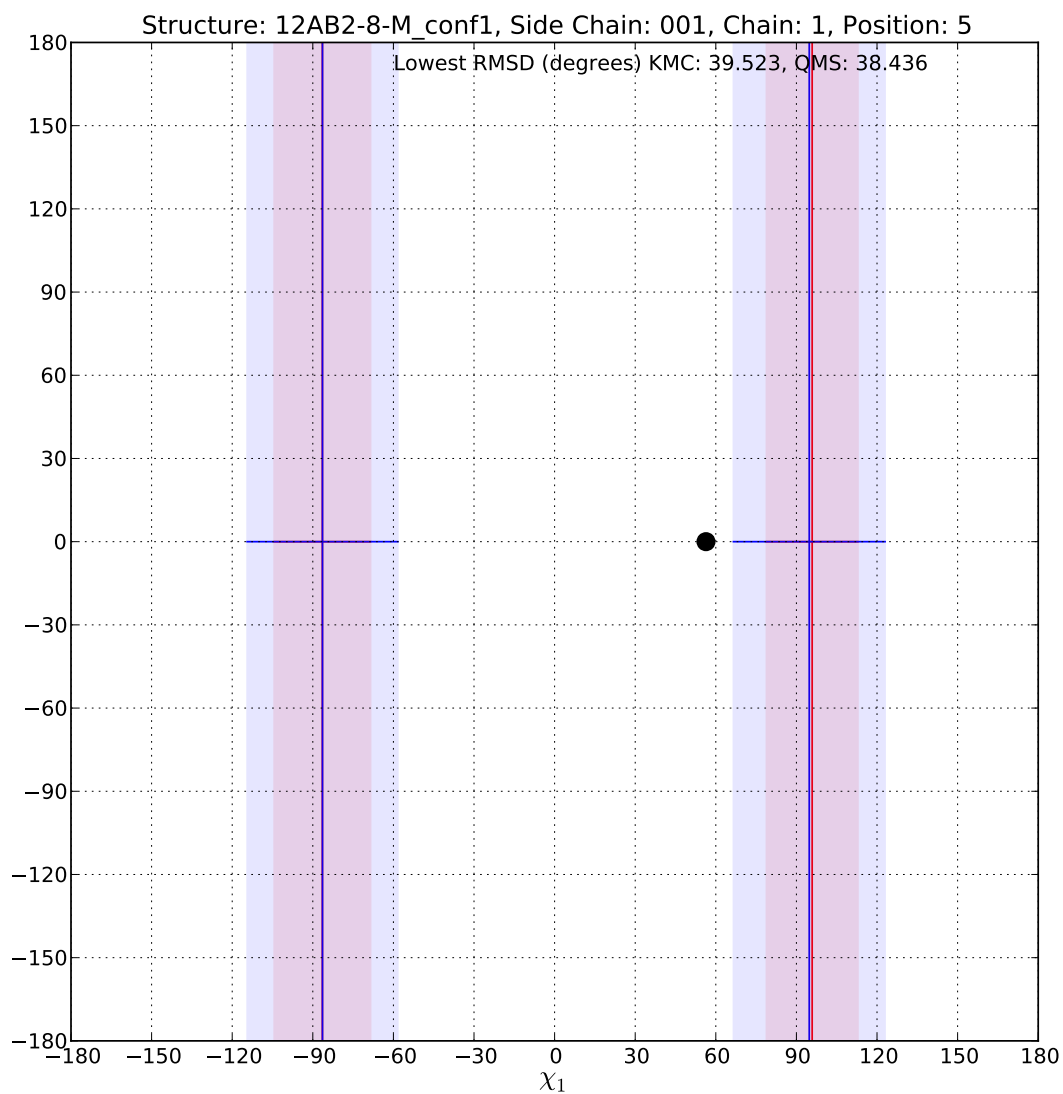

Figure S79: The rotamer library coverage plot for residue number 5 in chain 1 of peptoid databank structure 12AB2-8-M\_conf1. Interpolated rotamers from the k-means clustering (KMC) method are shown as red ellipses and rotamers for the quantum mechanically-seeded (QMS) method are shown in blue. Experimental values shown as black circles.

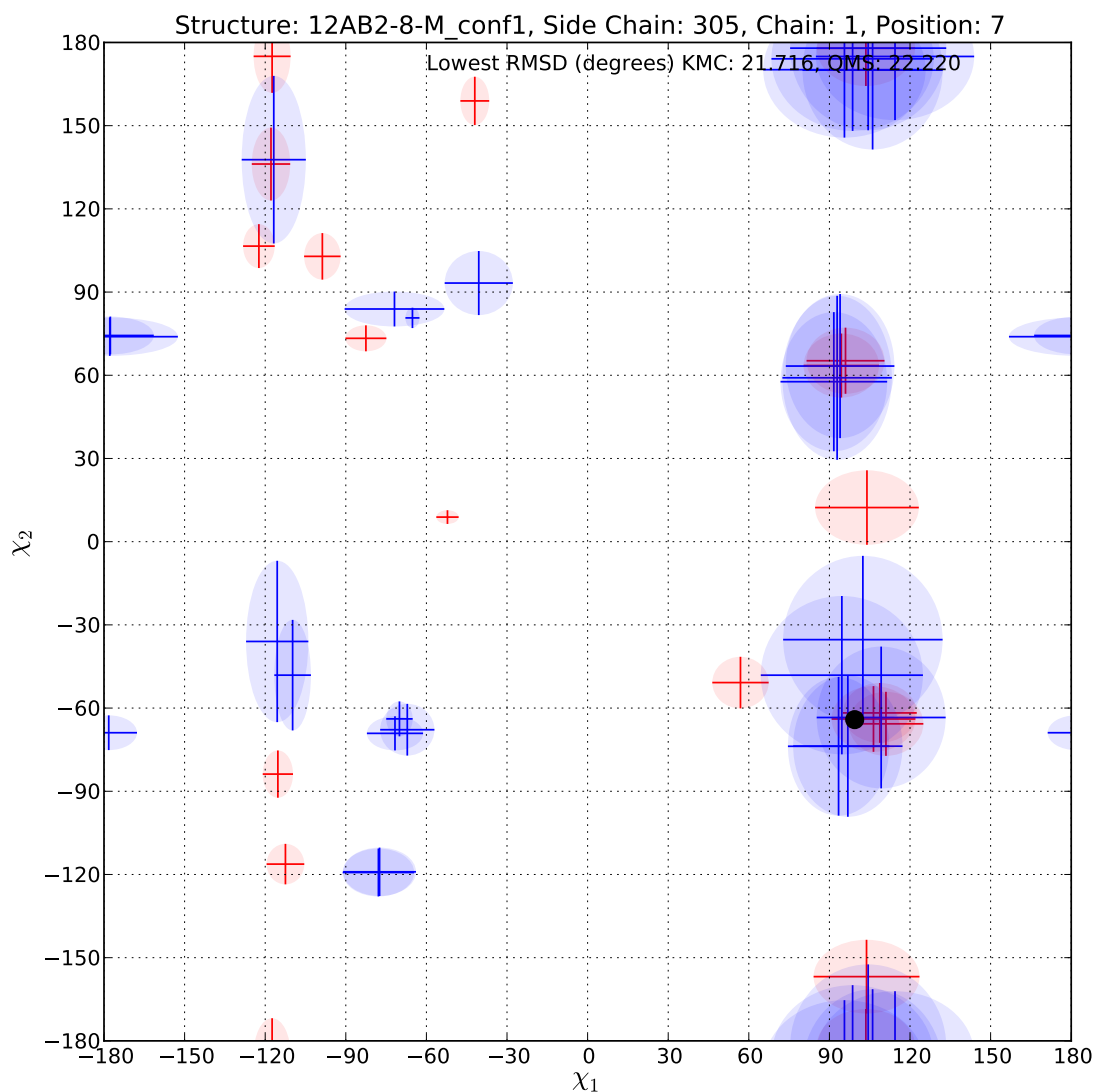

Figure S80: The rotamer library coverage plot for residue number 7 in chain 1 of peptoid databank structure 12AB2-8-M\_conf1. Interpolated rotamers from the k-means clustering (KMC) method are shown as red ellipses and rotamers for the quantum mechanically-seeded (QMS) method are shown in blue. Experimental values shown as black circles.

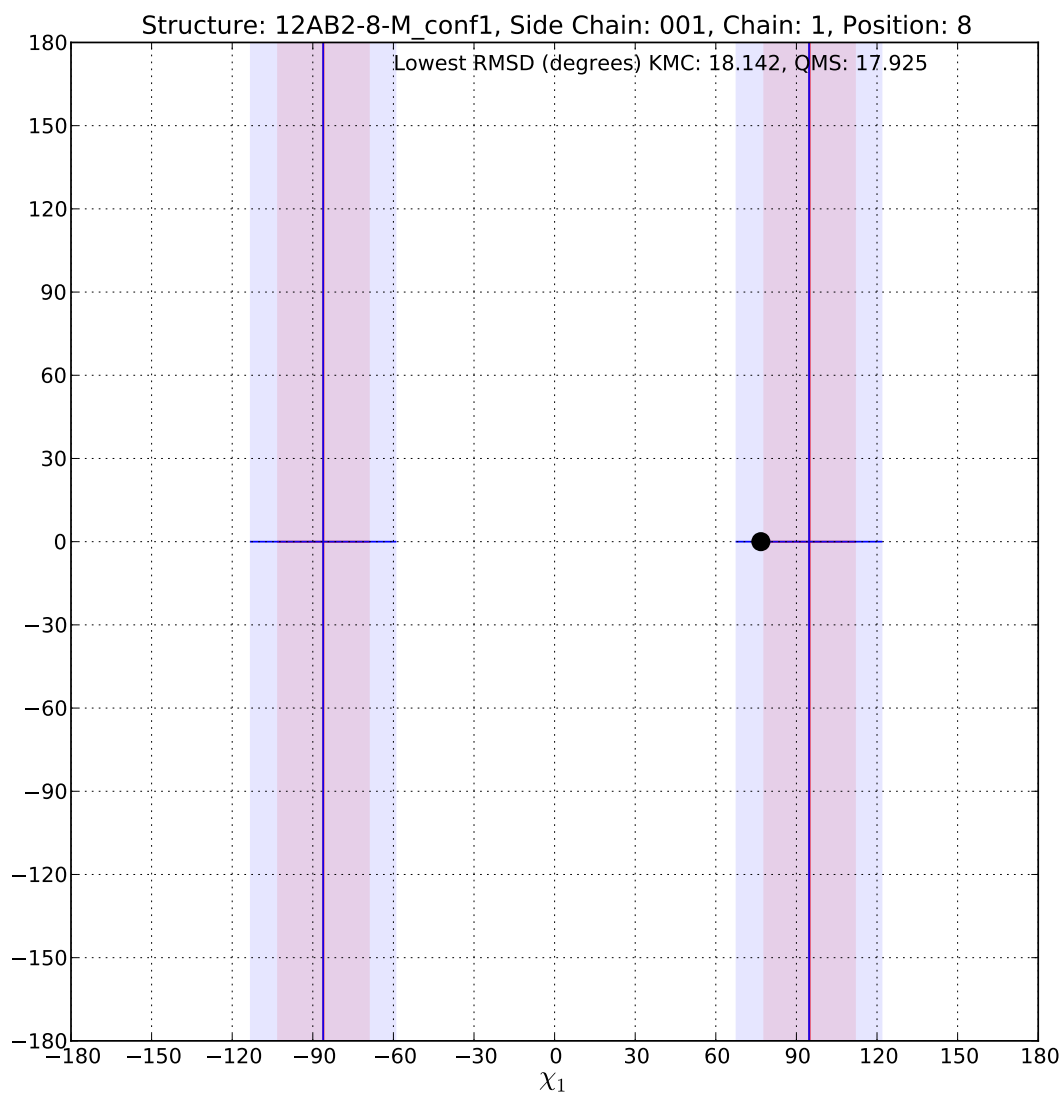

Figure S81: The rotamer library coverage plot for residue number 8 in chain 1 of peptoid databank structure 12AB2-8-M\_conf1. Interpolated rotamers from the k-means clustering (KMC) method are shown as red ellipses and rotamers for the quantum mechanically-seeded (QMS) method are shown in blue. Experimental values shown as black circles.

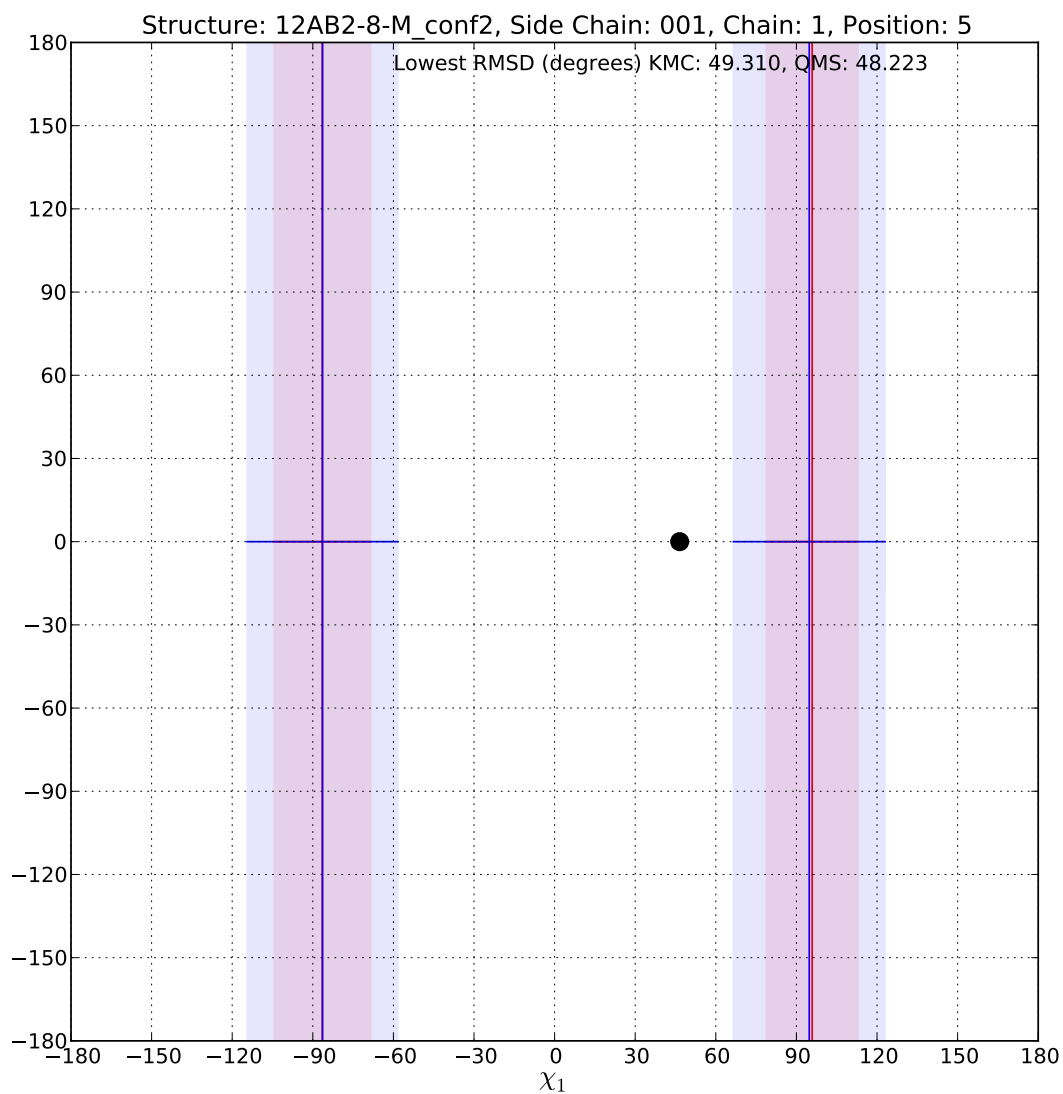

Figure S82: The rotamer library coverage plot for residue number 5 in chain 1 of peptoid databank structure 12AB2-8-M\_conf2. Interpolated rotamers from the k-means clustering (KMC) method are shown as red ellipses and rotamers for the quantum mechanically-seeded (QMS) method are shown in blue. Experimental values shown as black circles.

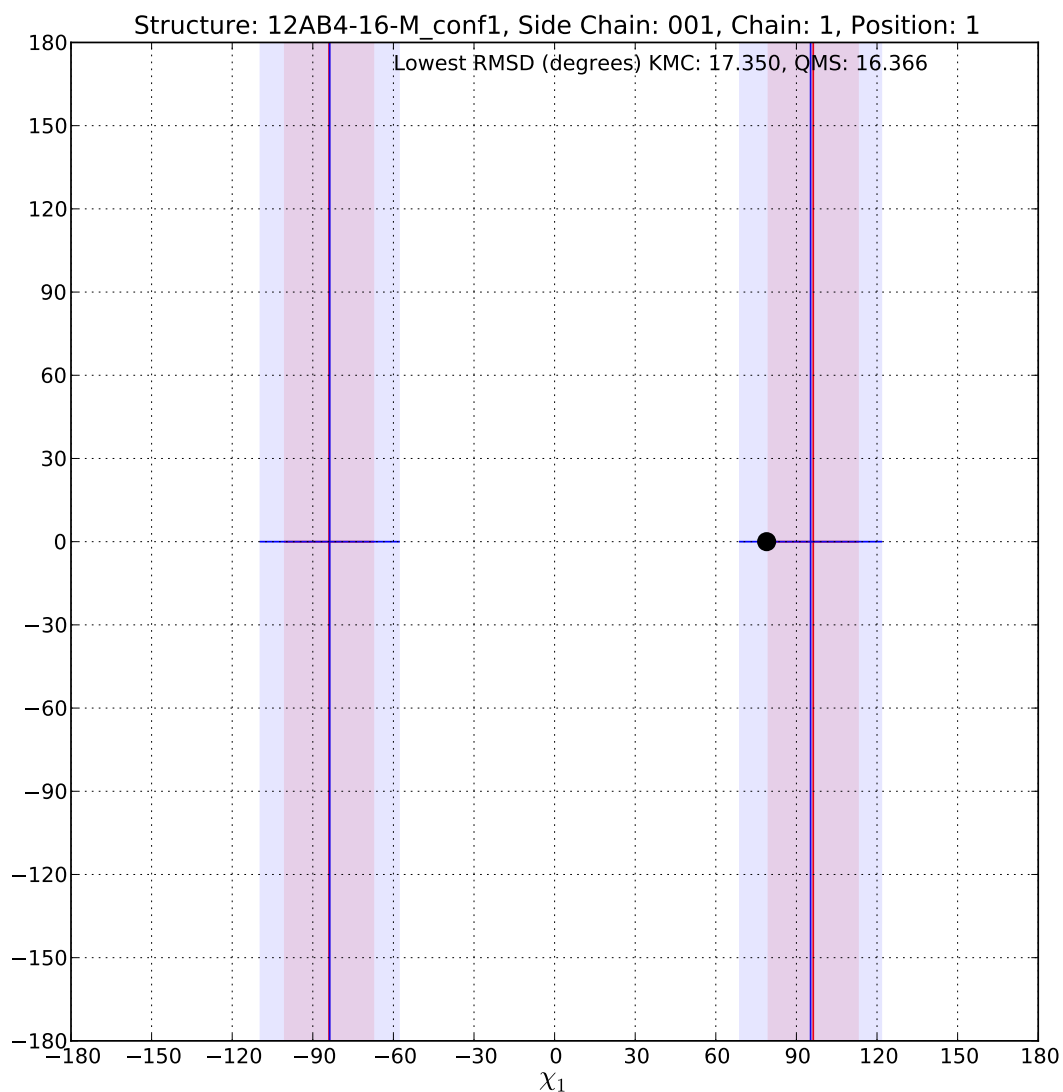

Figure S83: The rotamer library coverage plot for residue number 1 in chain 1 of peptoid databank structure 12AB4-16-M\_conf1. Interpolated rotamers from the k-means clustering (KMC) method are shown as red ellipses and rotamers for the quantum mechanically-seeded (QMS) method are shown in blue. Experimental values shown as black circles.

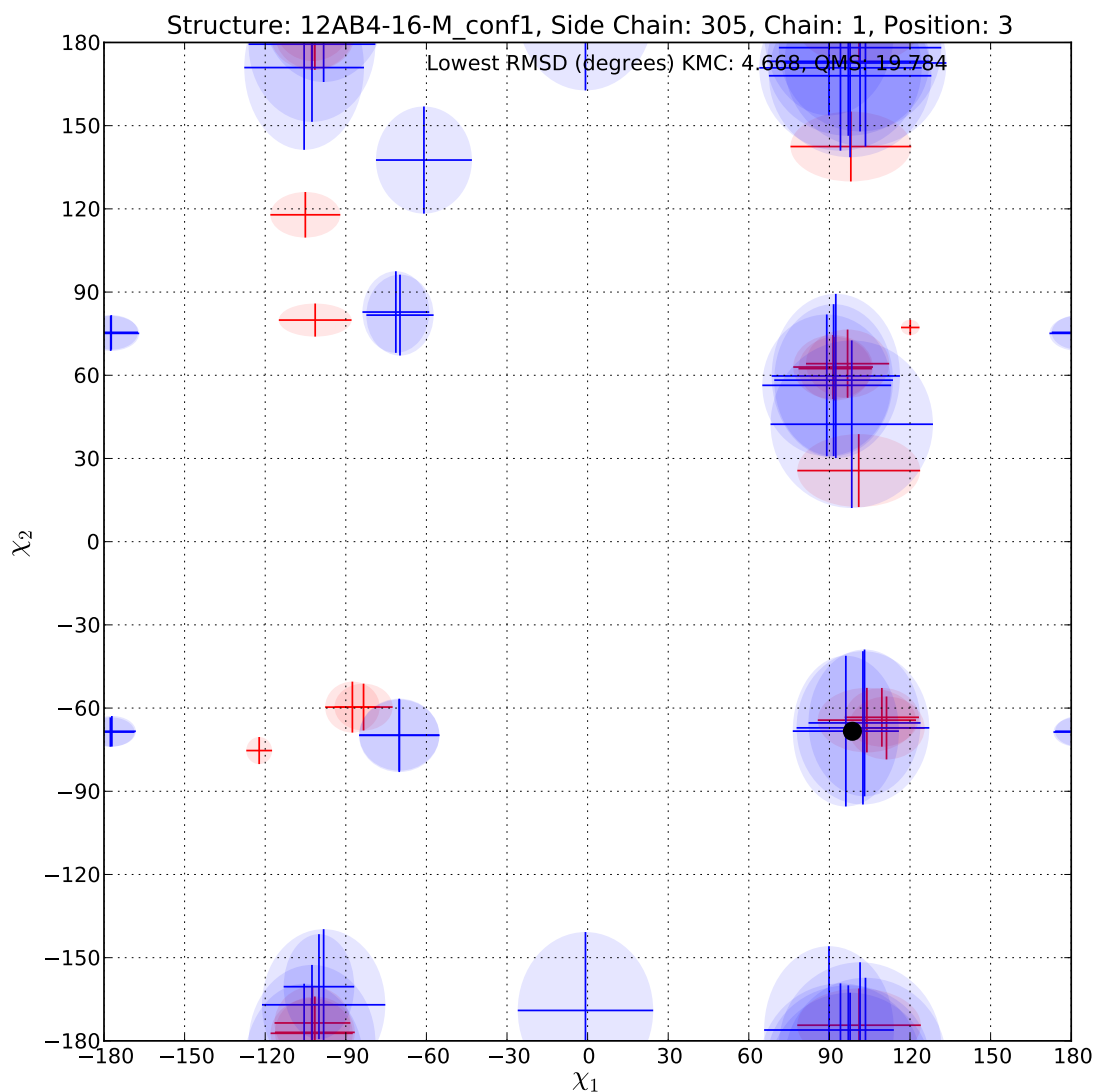

Figure S84: The rotamer library coverage plot for residue number 3 in chain 1 of peptoid databank structure 12AB4-16-M\_conf1. Interpolated rotamers from the k-means clustering (KMC) method are shown as red ellipses and rotamers for the quantum mechanically-seeded (QMS) method are shown in blue. Experimental values shown as black circles.

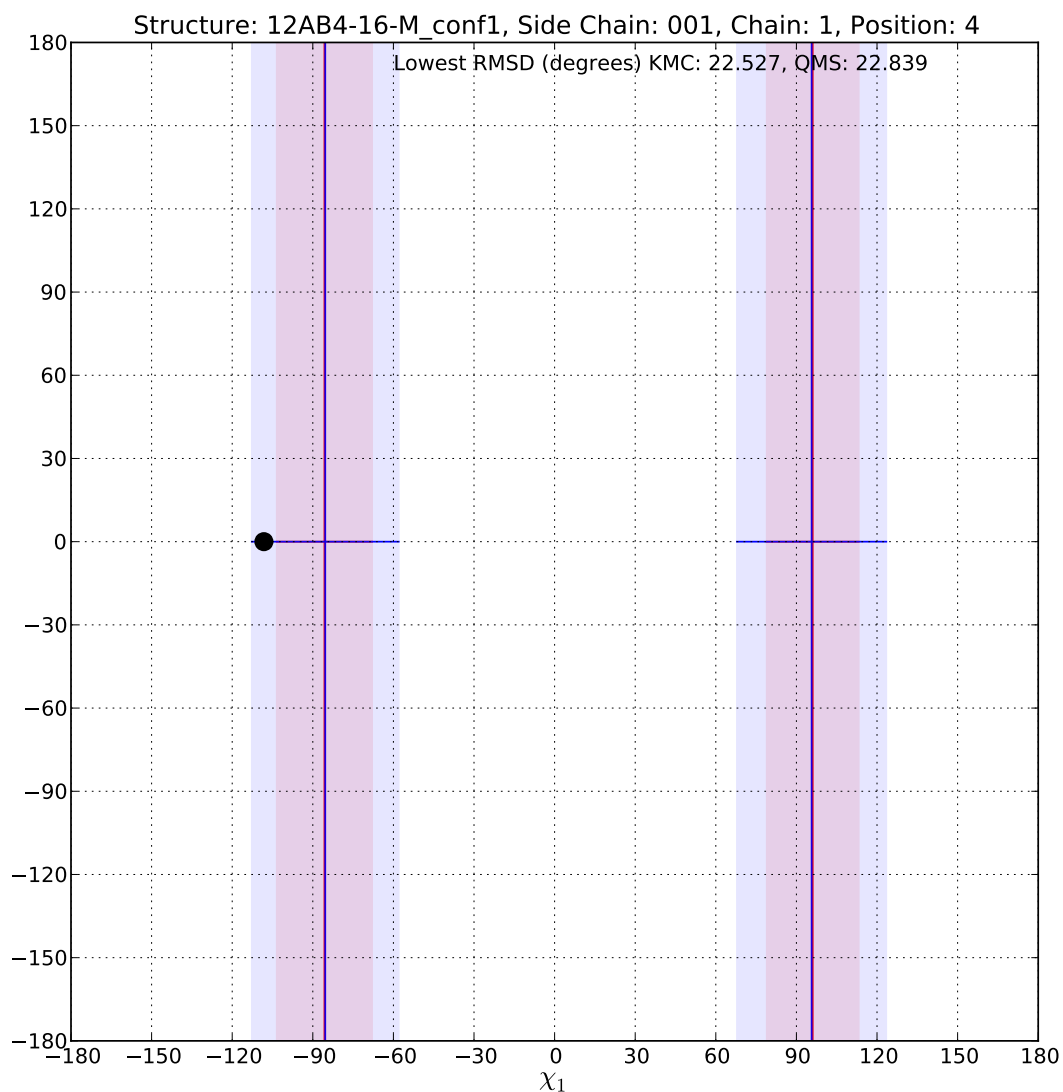

Figure S85: The rotamer library coverage plot for residue number 4 in chain 1 of peptoid databank structure 12AB4-16-M\_conf1. Interpolated rotamers from the k-means clustering (KMC) method are shown as red ellipses and rotamers for the quantum mechanically-seeded (QMS) method are shown in blue. Experimental values shown as black circles.

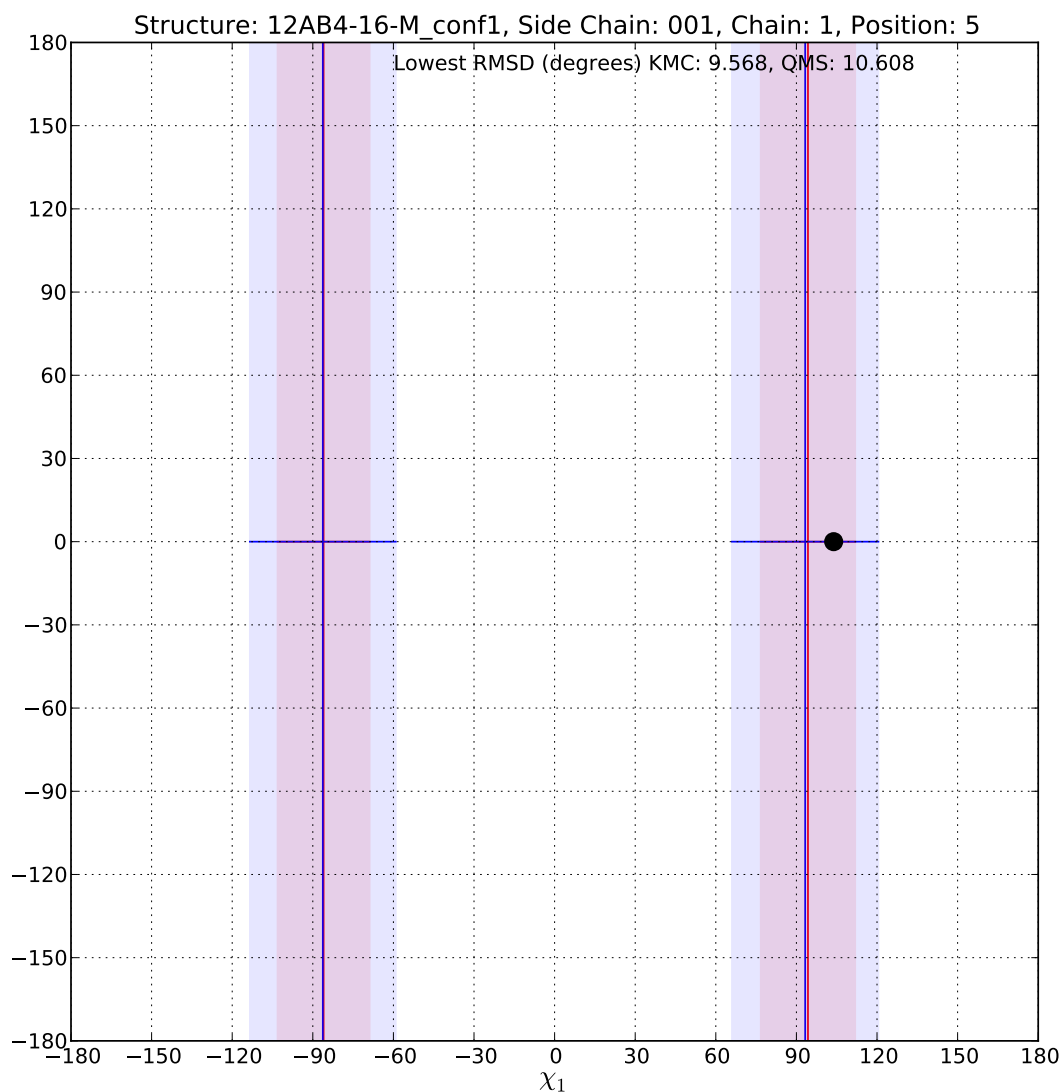

Figure S86: The rotamer library coverage plot for residue number 5 in chain 1 of peptoid databank structure 12AB4-16-M\_conf1. Interpolated rotamers from the k-means clustering (KMC) method are shown as red ellipses and rotamers for the quantum mechanically-seeded (QMS) method are shown in blue. Experimental values shown as black circles.



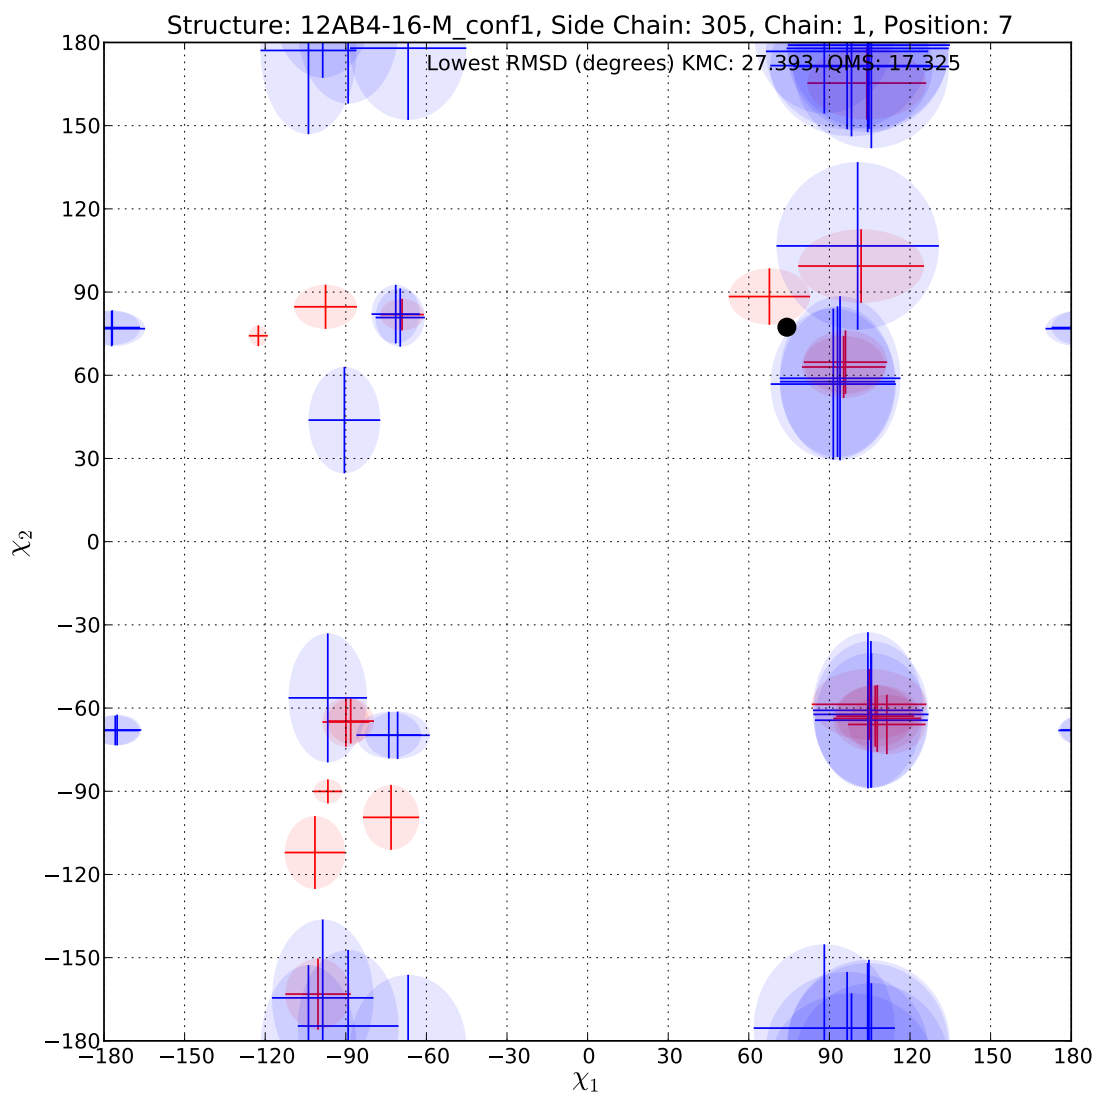

Figure S87: The rotamer library coverage plot for residue number 7 in chain 1 of peptoid databank structure 12AB4-16-M\_conf1. Interpolated rotamers from the k-means clustering (KMC) method are shown as red ellipses and rotamers for the quantum mechanically-seeded (QMS) method are shown in blue. Experimental values shown as black circles.

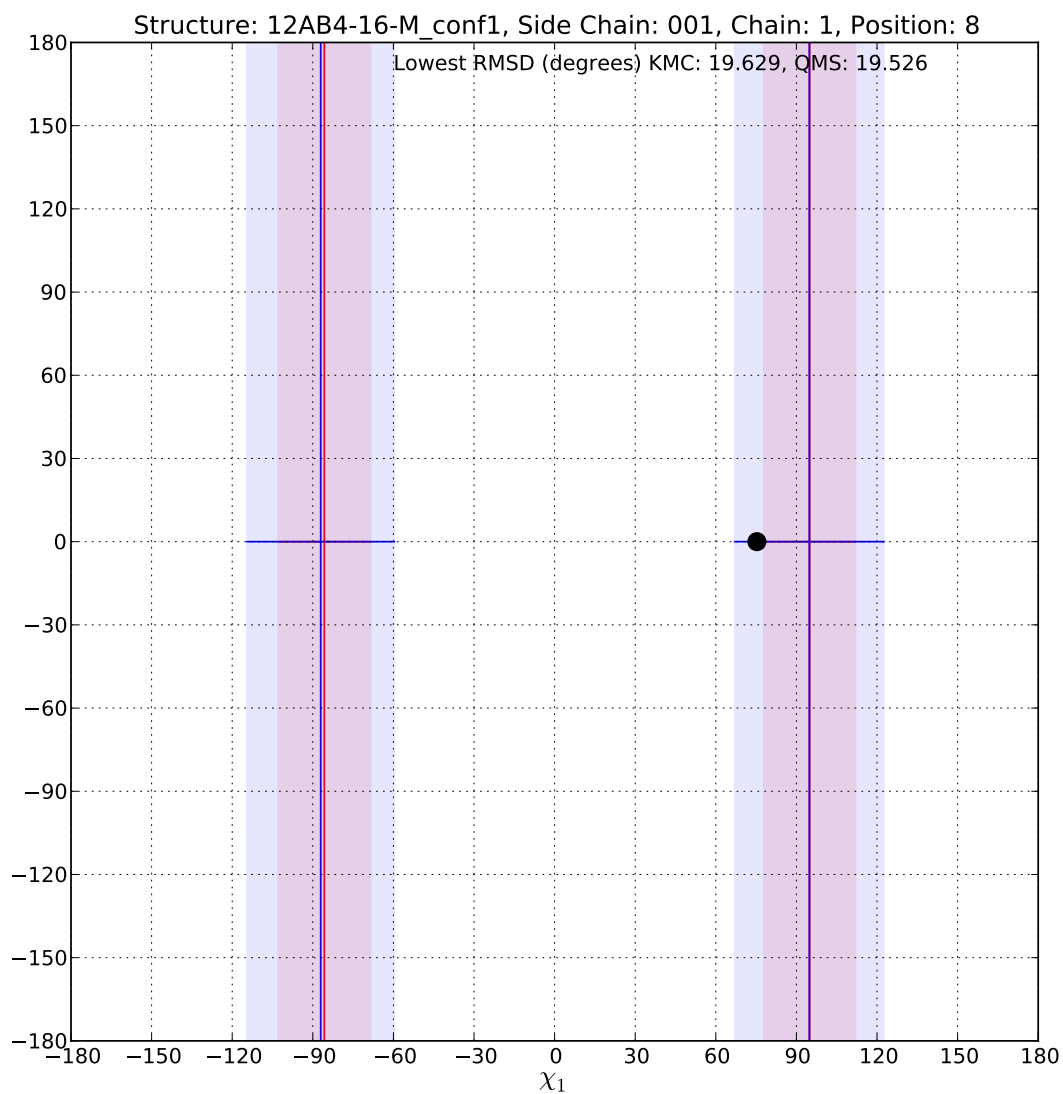

Figure S88: The rotamer library coverage plot for residue number 8 in chain 1 of peptoid databank structure 12AB4-16-M\_conf1. Interpolated rotamers from the k-means clustering (KMC) method are shown as red ellipses and rotamers for the quantum mechanically-seeded (QMS) method are shown in blue. Experimental values shown as black circles.

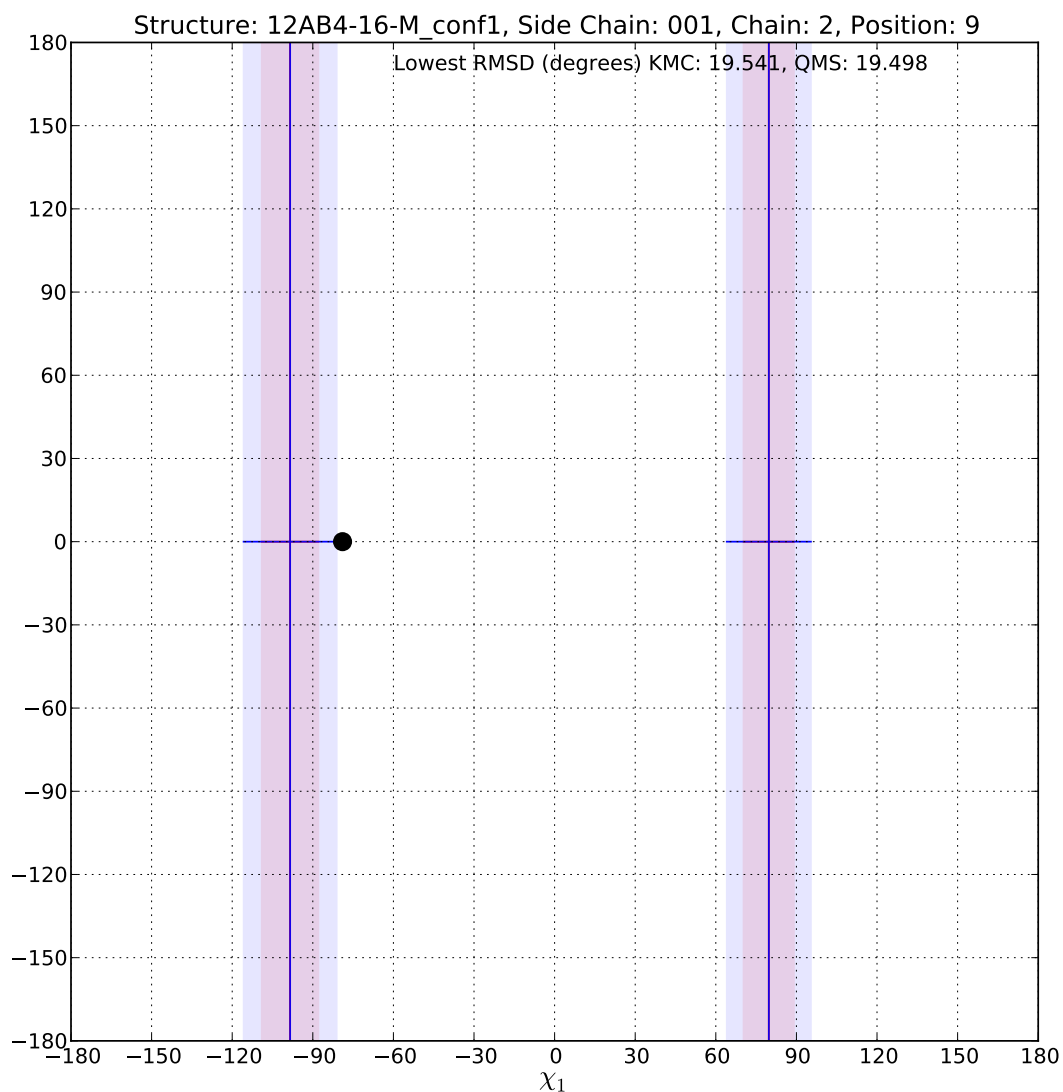

Figure S89: The rotamer library coverage plot for residue number 9 in chain 2 of peptoid databank structure 12AB4-16-M\_conf1. Interpolated rotamers from the k-means clustering (KMC) method are shown as red ellipses and rotamers for the quantum mechanically-seeded (QMS) method are shown in blue. Experimental values shown as black circles.

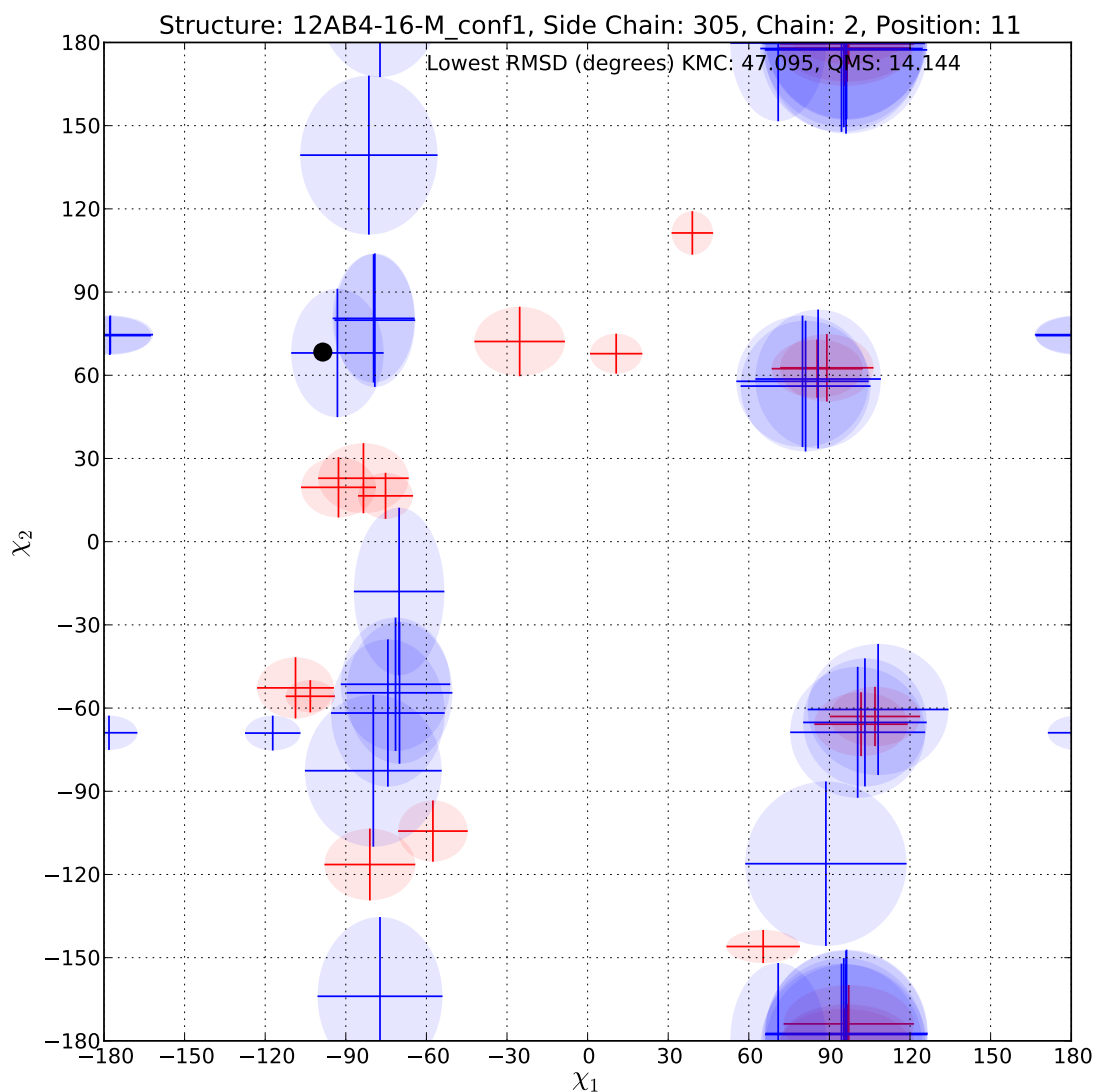

Figure S90: The rotamer library coverage plot for residue number 11 in chain 2 of peptoid databank structure 12AB4-16-M\_conf1. Interpolated rotamers from the k-means clustering (KMC) method are shown as red ellipses and rotamers for the quantum mechanically-seeded (QMS) method are shown in blue. Experimental values shown as black circles.

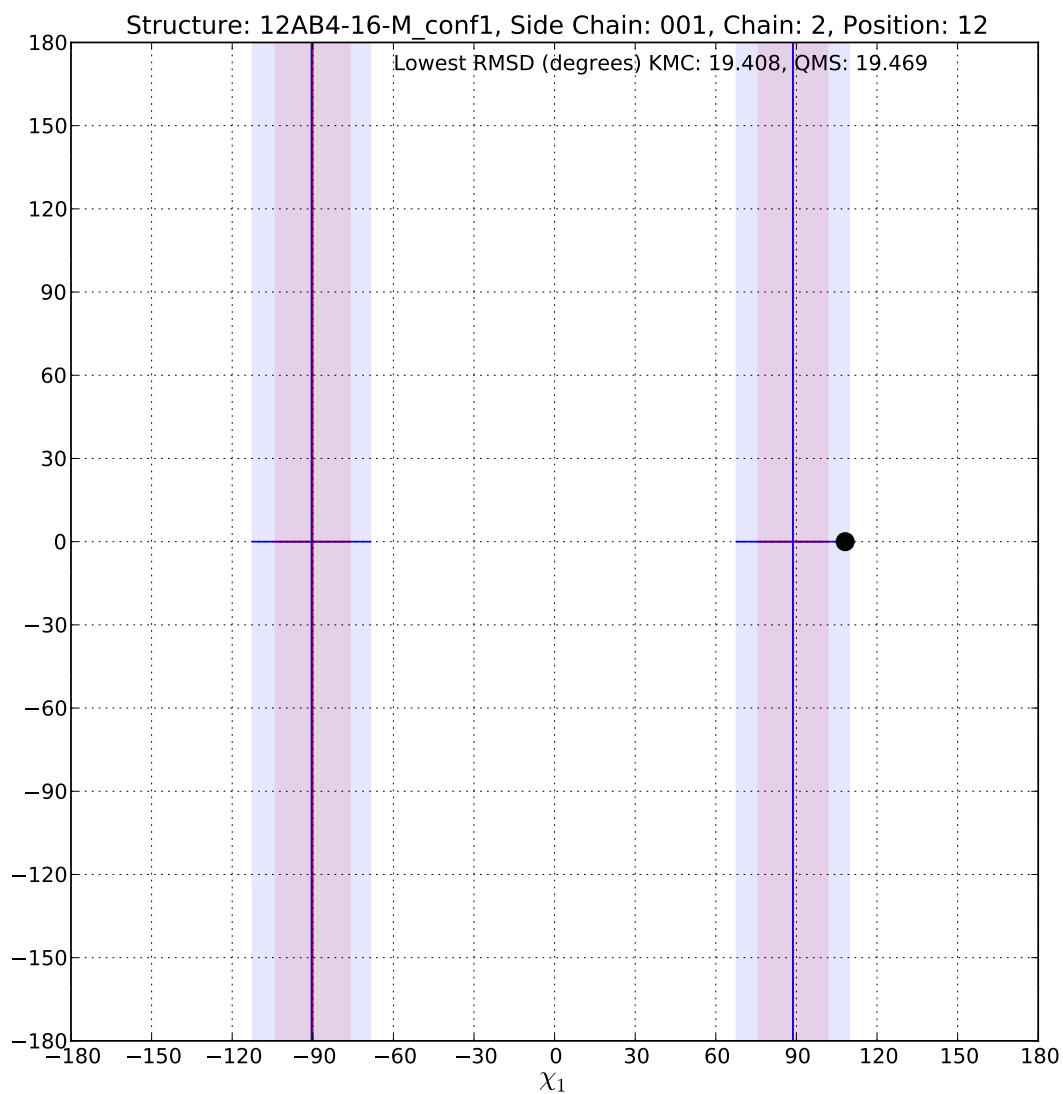

Figure S91: The rotamer library coverage plot for residue number 12 in chain 2 of peptoid databank structure 12AB4-16-M\_conf1. Interpolated rotamers from the k-means clustering (KMC) method are shown as red ellipses and rotamers for the quantum mechanically-seeded (QMS) method are shown in blue. Experimental values shown as black circles.

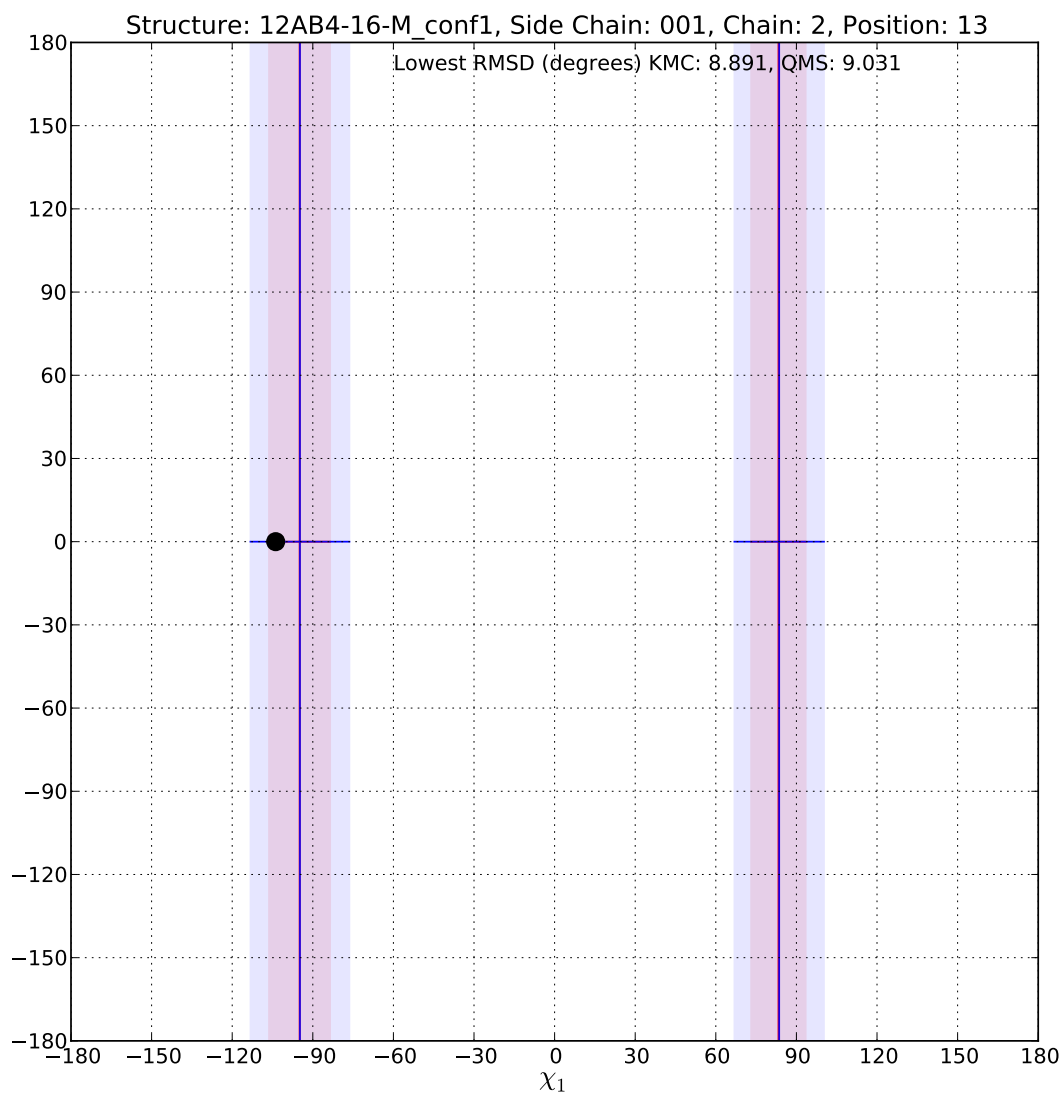

Figure S92: The rotamer library coverage plot for residue number 13 in chain 2 of peptoid databank structure 12AB4-16-M\_conf1. Interpolated rotamers from the k-means clustering (KMC) method are shown as red ellipses and rotamers for the quantum mechanically-seeded (QMS) method are shown in blue. Experimental values shown as black circles.

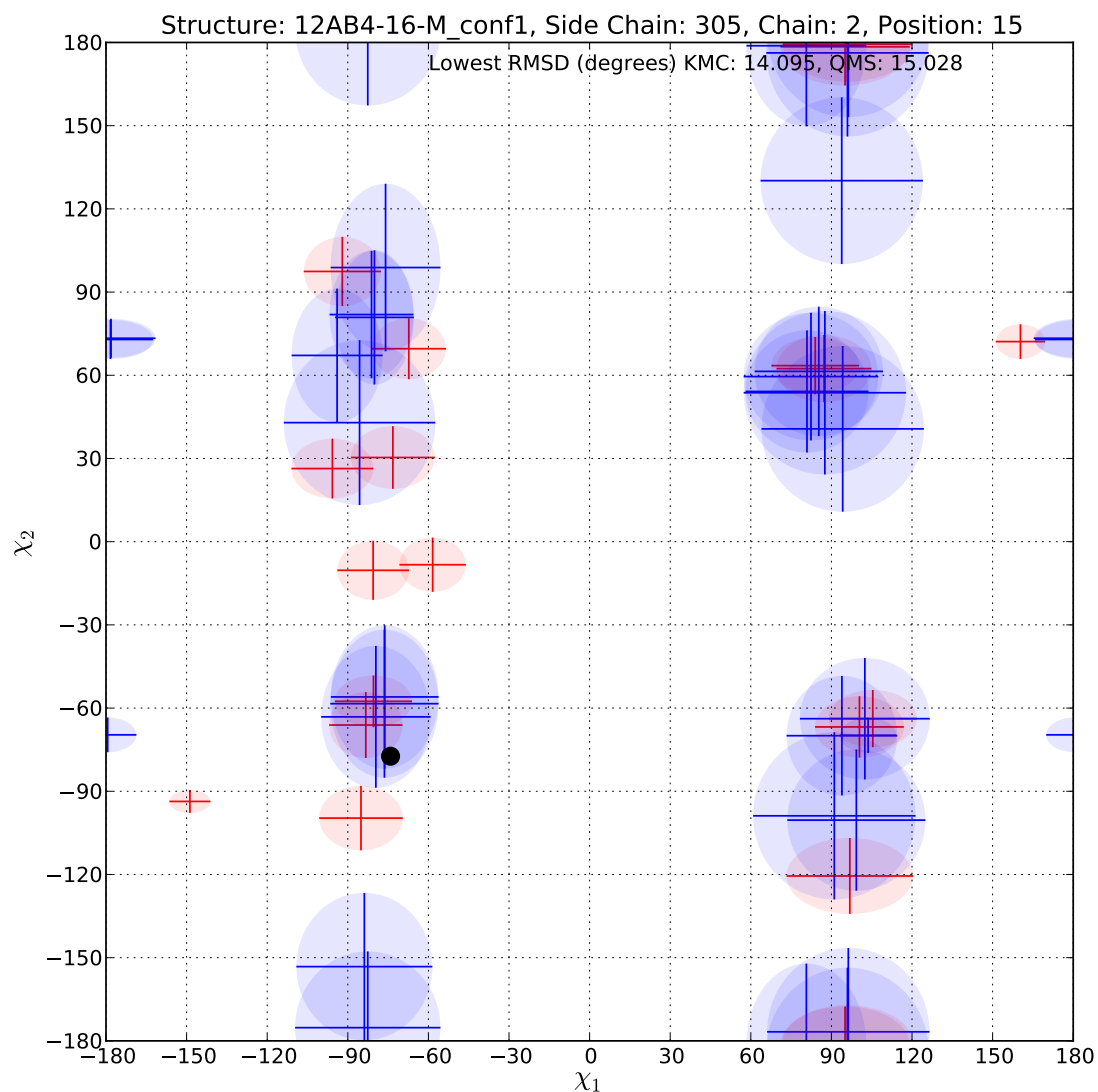

Figure S93: The rotamer library coverage plot for residue number 15 in chain 2 of peptoid databank structure 12AB4-16-M\_conf1. Interpolated rotamers from the k-means clustering (KMC) method are shown as red ellipses and rotamers for the quantum mechanically-seeded (QMS) method are shown in blue. Experimental values shown as black circles.

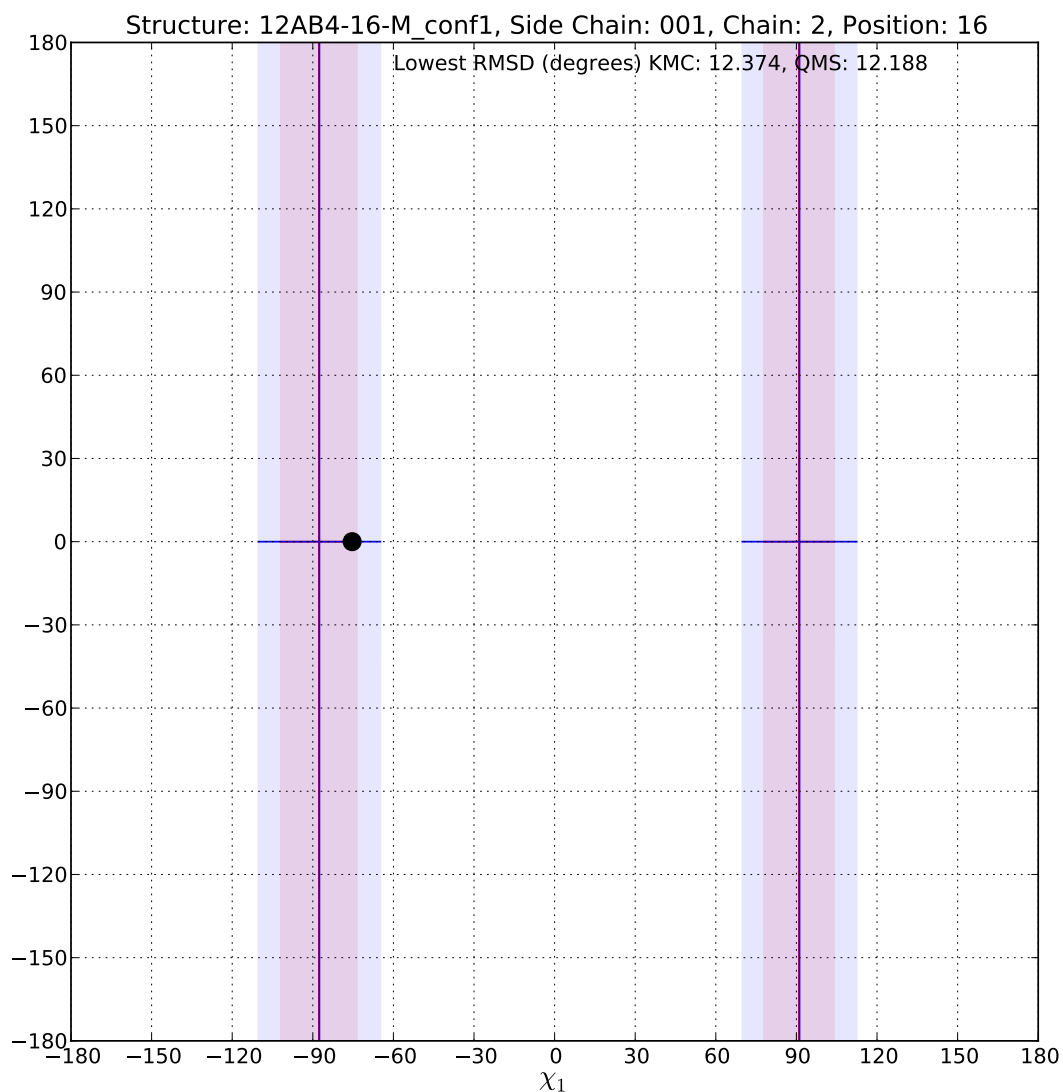

Figure S94: The rotamer library coverage plot for residue number 16 in chain 2 of peptoid databank structure 12AB4-16-M\_conf1. Interpolated rotamers from the k-means clustering (KMC) method are shown as red ellipses and rotamers for the quantum mechanically-seeded (QMS) method are shown in blue. Experimental values shown as black circles.



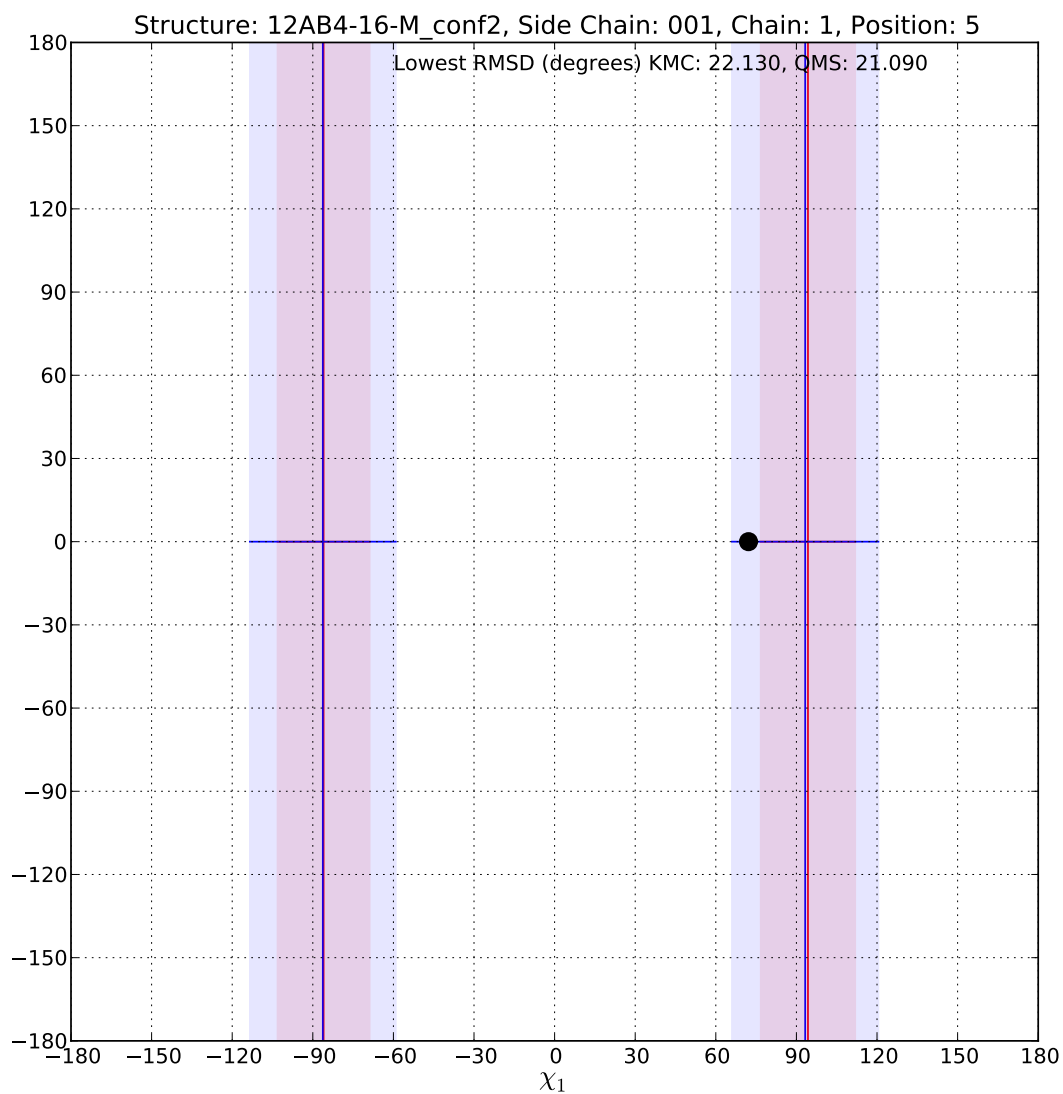

Figure S95: The rotamer library coverage plot for residue number 5 in chain 1 of peptoid databank structure 12AB4-16-M\_conf2. Interpolated rotamers from the k-means clustering (KMC) method are shown as red ellipses and rotamers for the quantum mechanically-seeded (QMS) method are shown in blue. Experimental values shown as black circles.

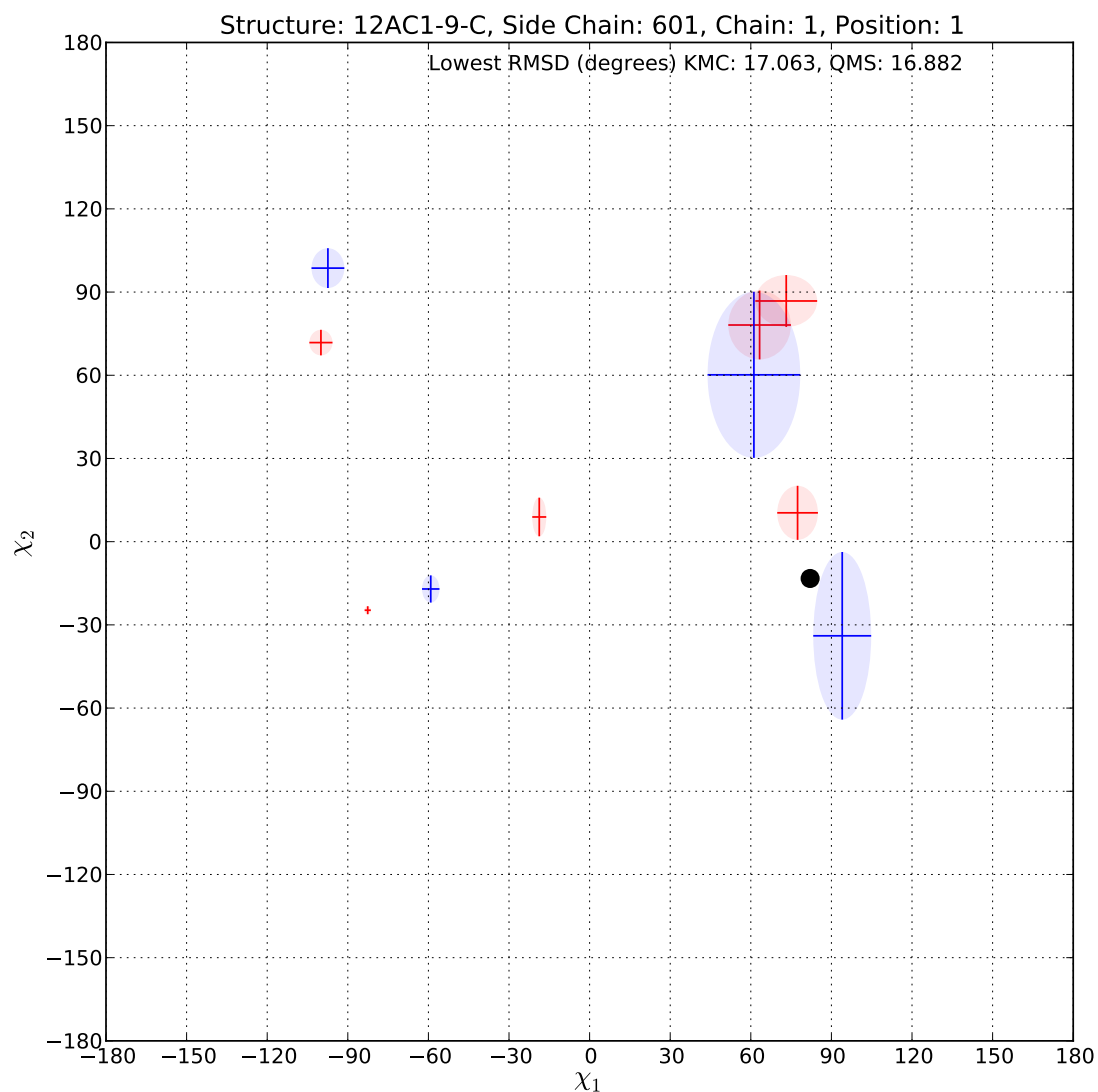

Figure S96: The rotamer library coverage plot for residue number 1 in chain 1 of peptoid databank structure 12AC1-9-C. Interpolated rotamers from the k-means clustering (KMC) method are shown as red ellipses and rotamers for the quantum mechanically-seeded (QMS) method are shown in blue. Experimental values shown as black circles.

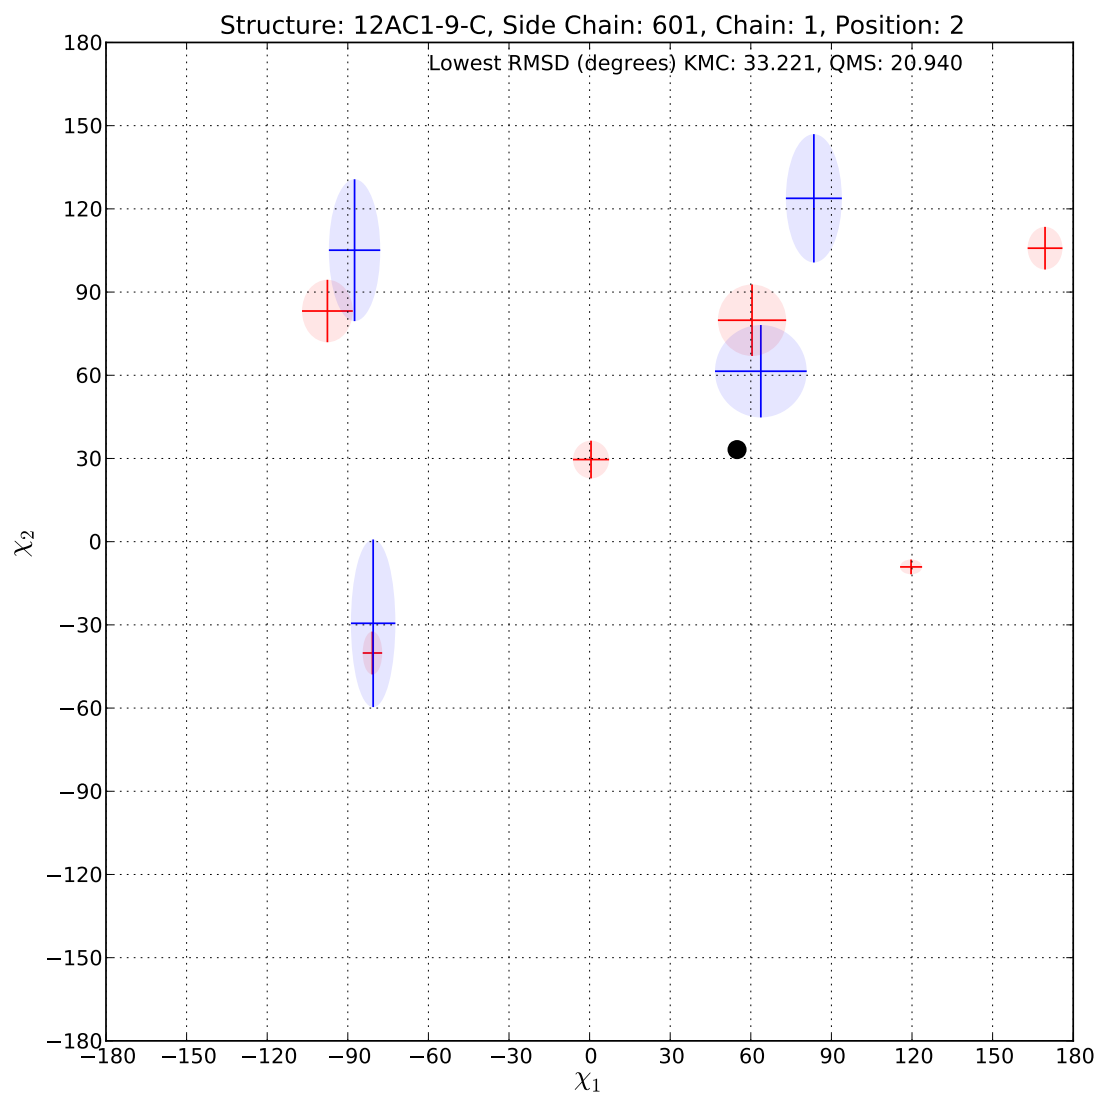

Figure S97: The rotamer library coverage plot for residue number 2 in chain 1 of peptoid databank structure 12AC1-9-C. Interpolated rotamers from the k-means clustering (KMC) method are shown as red ellipses and rotamers for the quantum mechanically-seeded (QMS) method are shown in blue. Experimental values shown as black circles.

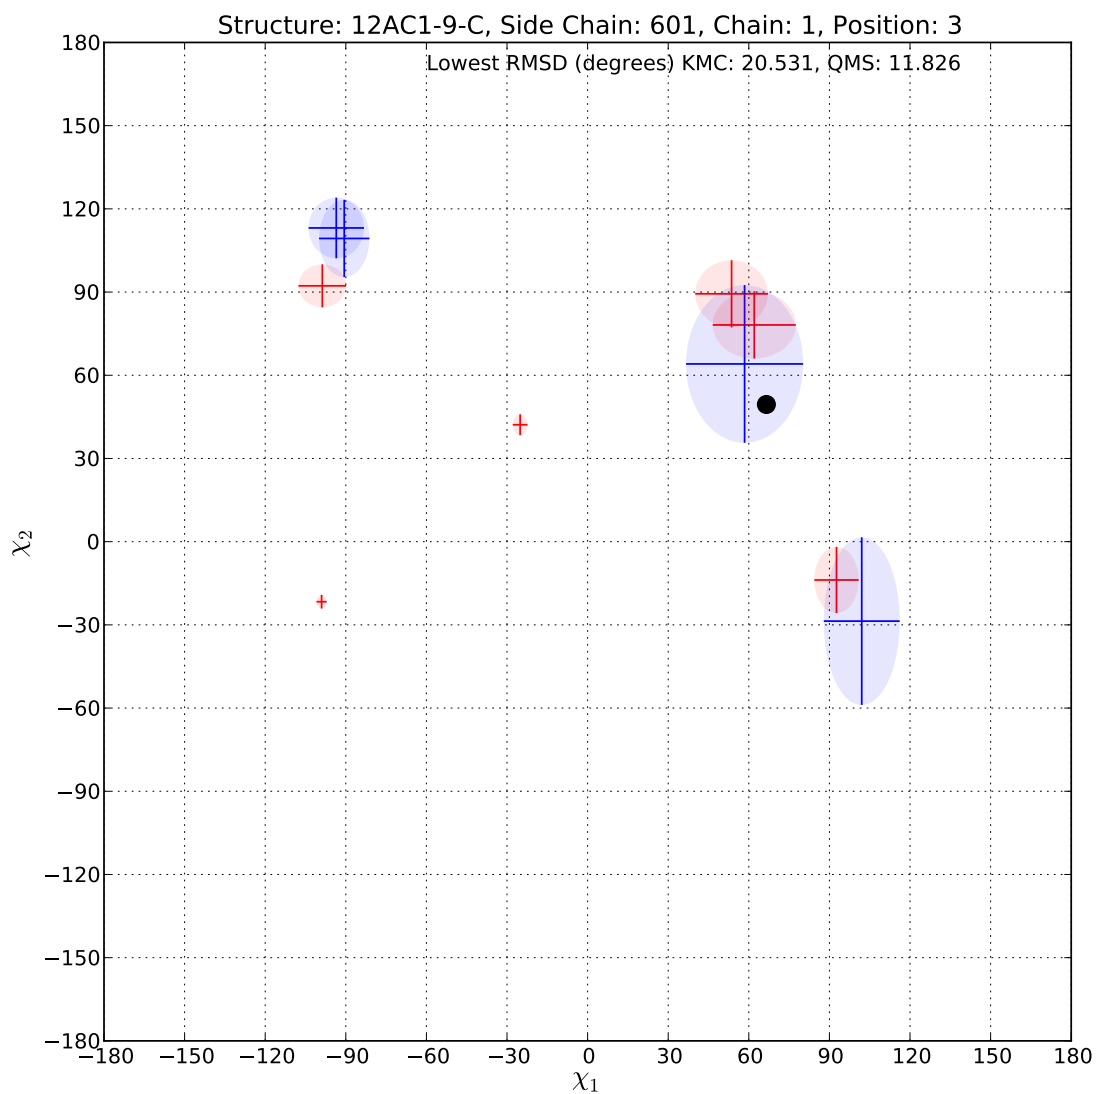

Figure S98: The rotamer library coverage plot for residue number 3 in chain 1 of peptoid databank structure 12AC1-9-C. Interpolated rotamers from the k-means clustering (KMC) method are shown as red ellipses and rotamers for the quantum mechanically-seeded (QMS) method are shown in blue. Experimental values shown as black circles.

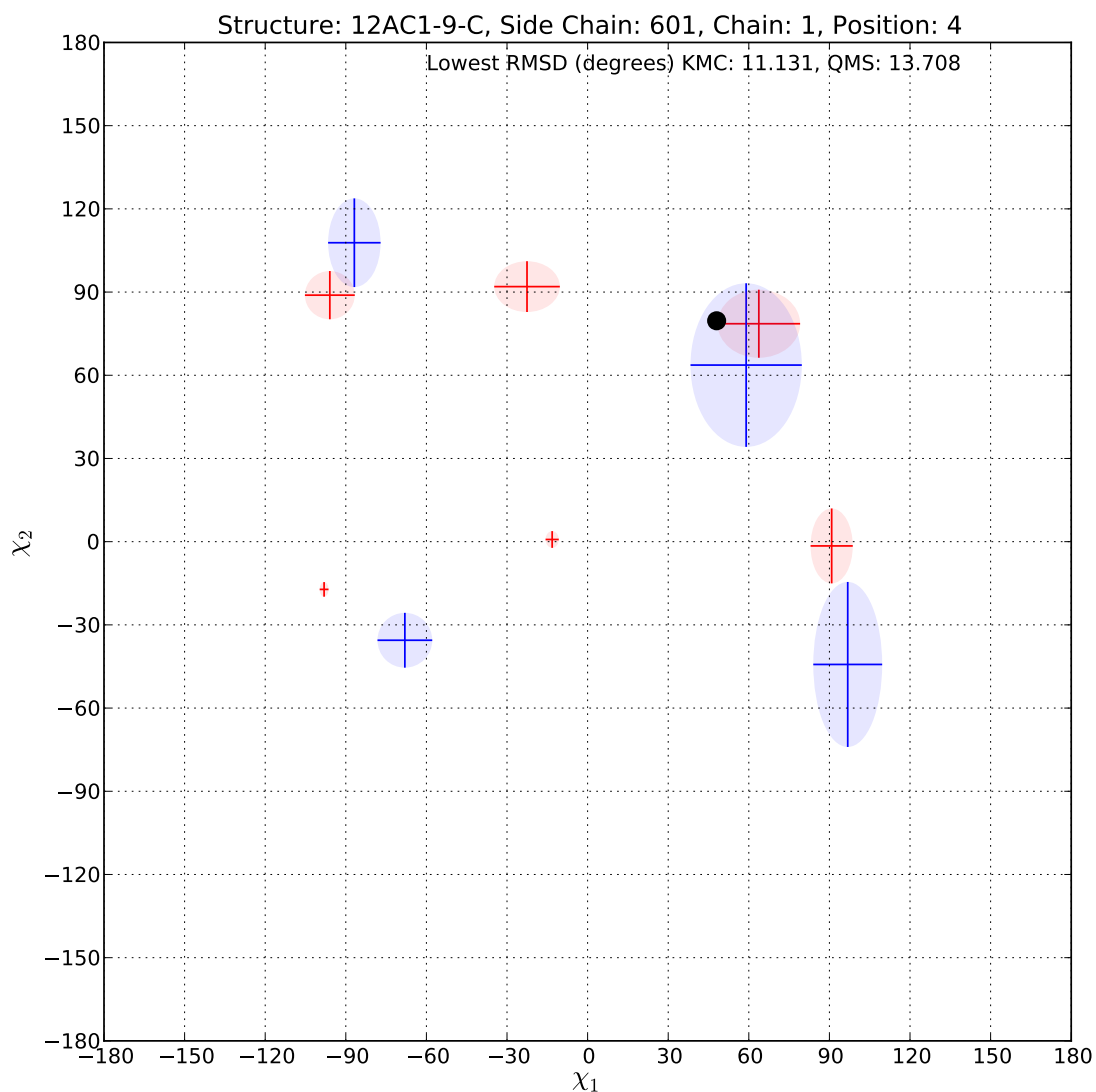

Figure S99: The rotamer library coverage plot for residue number 4 in chain 1 of peptoid databank structure 12AC1-9-C. Interpolated rotamers from the k-means clustering (KMC) method are shown as red ellipses and rotamers for the quantum mechanically-seeded (QMS) method are shown in blue. Experimental values shown as black circles.

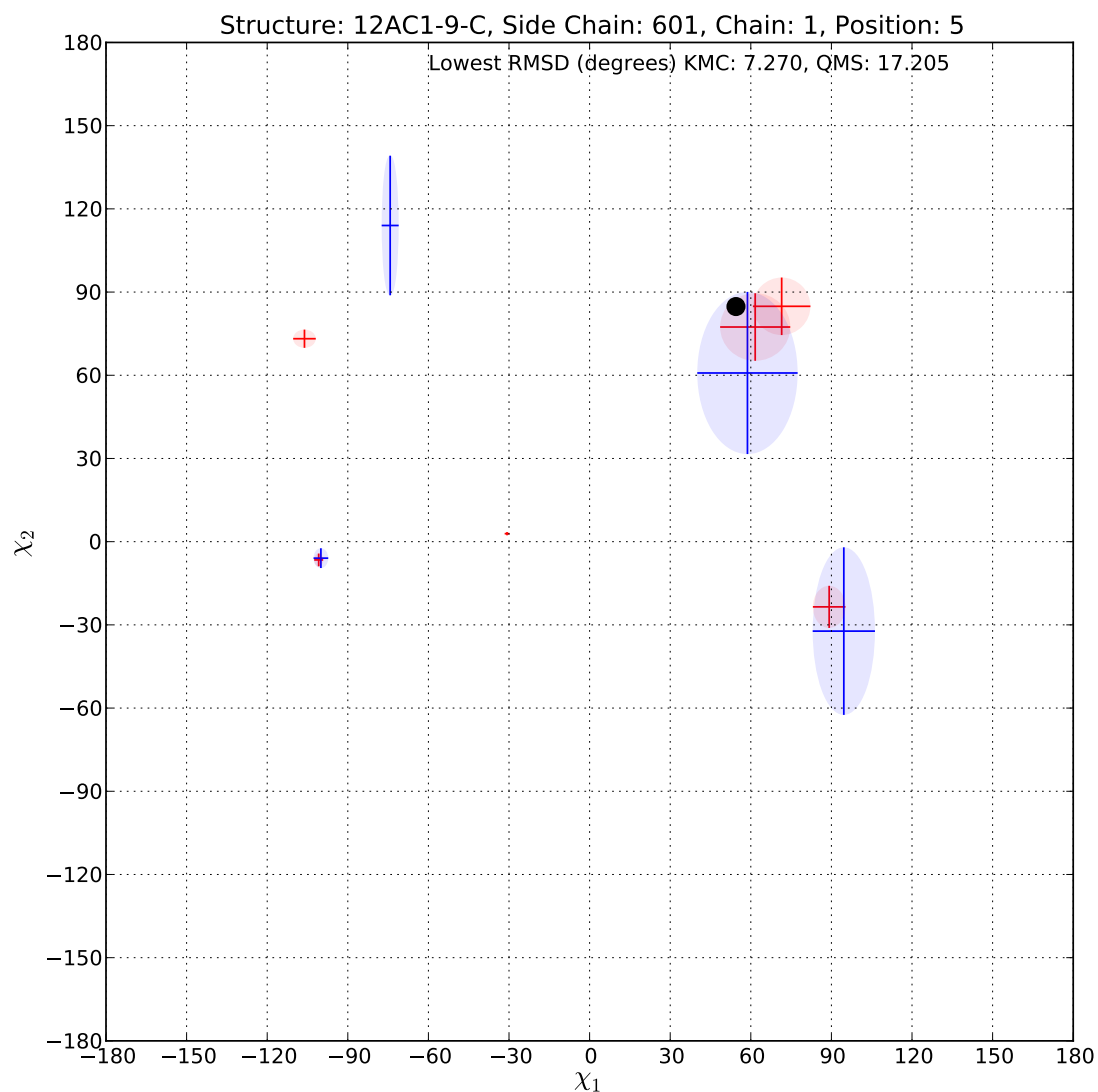

Figure S100: The rotamer library coverage plot for residue number 5 in chain 1 of peptoid databank structure 12AC1-9-C. Interpolated rotamers from the k-means clustering (KMC) method are shown as red ellipses and rotamers for the quantum mechanically-seeded (QMS) method are shown in blue. Experimental values shown as black circles.

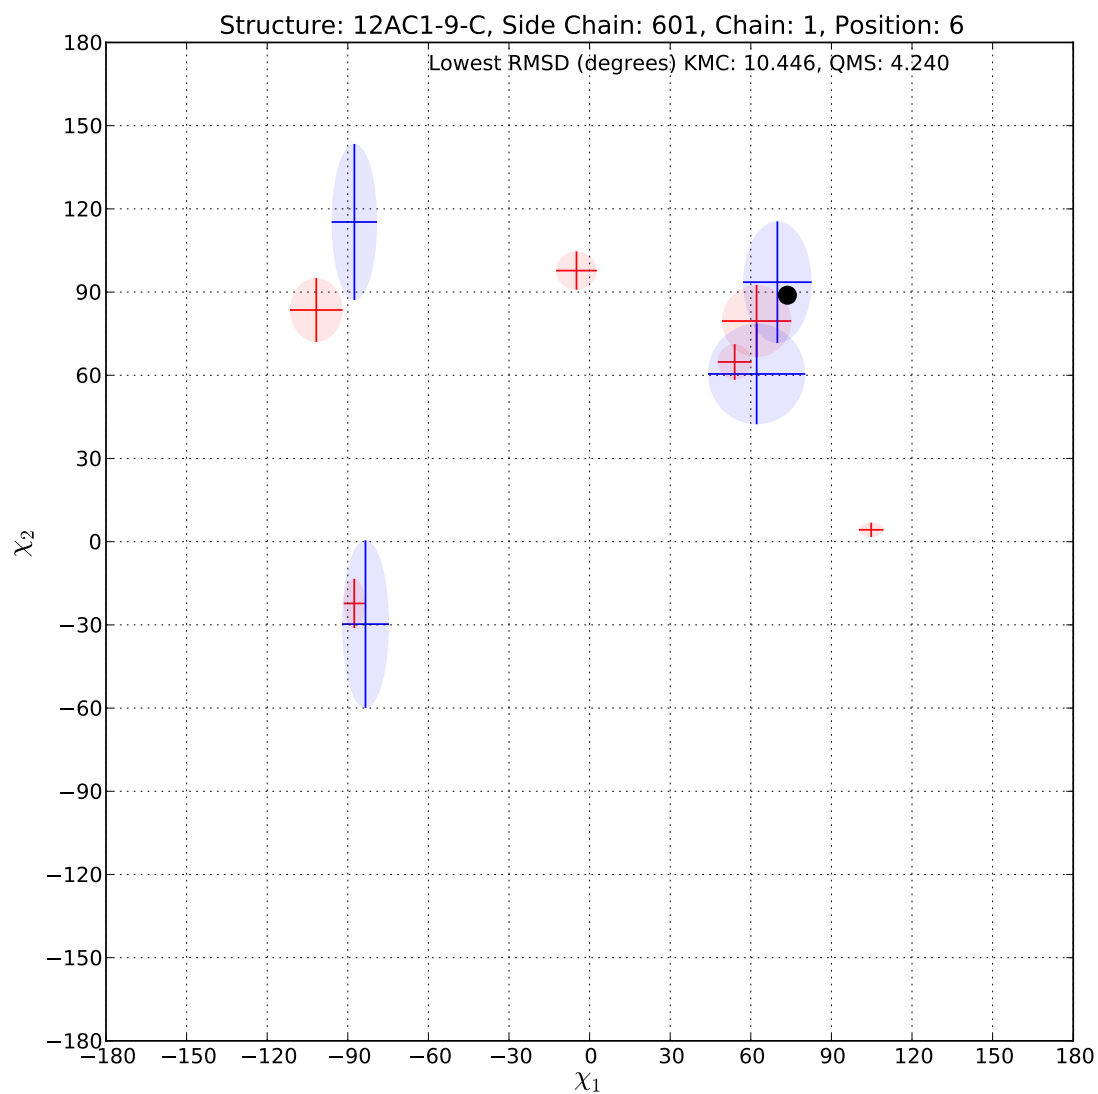

Figure S101: The rotamer library coverage plot for residue number 6 in chain 1 of peptoid databank structure 12AC1-9-C. Interpolated rotamers from the k-means clustering (KMC) method are shown as red ellipses and rotamers for the quantum mechanically-seeded (QMS) method are shown in blue. Experimental values shown as black circles.

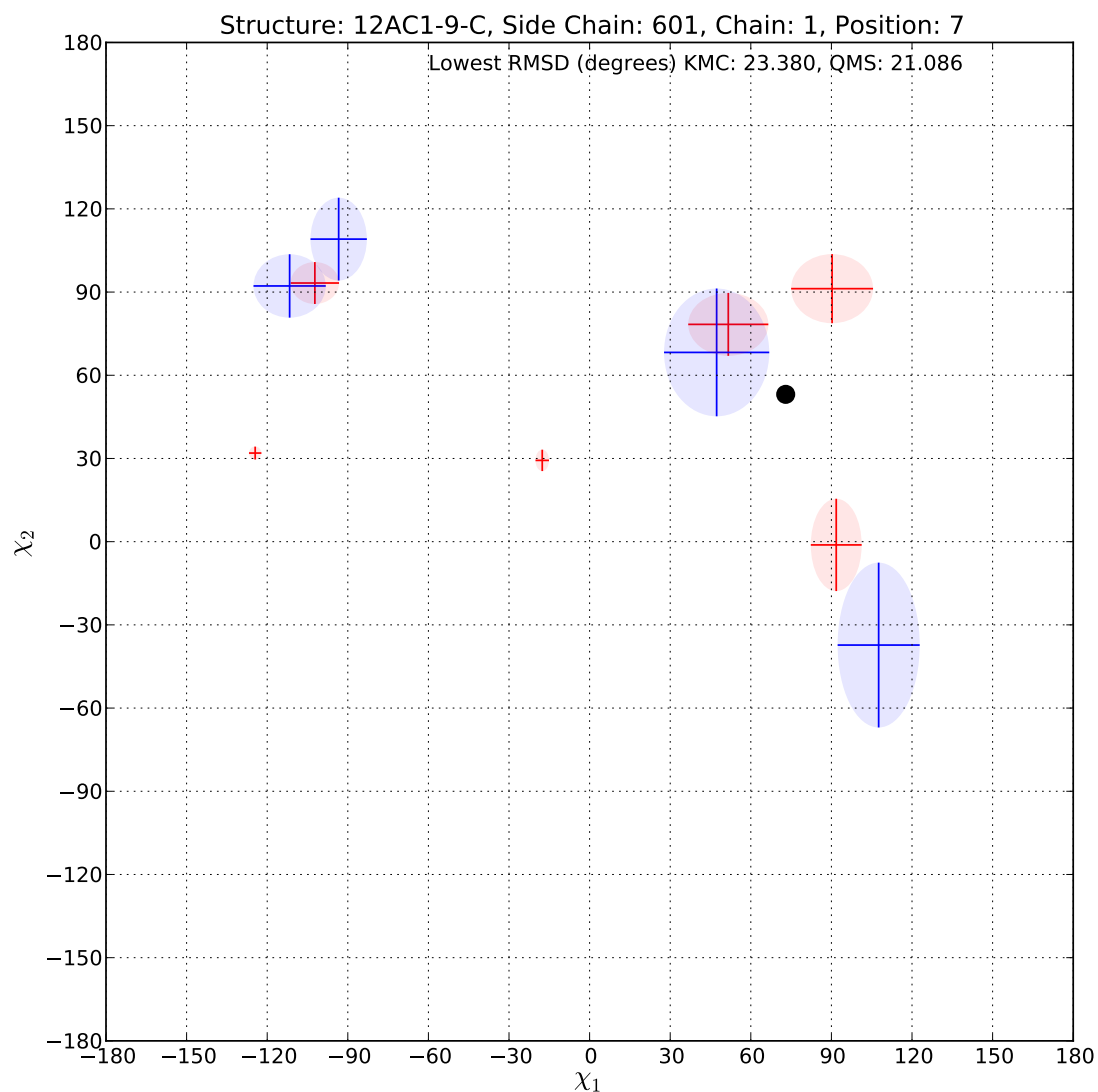

Figure S102: The rotamer library coverage plot for residue number 7 in chain 1 of peptoid databank structure 12AC1-9-C. Interpolated rotamers from the k-means clustering (KMC) method are shown as red ellipses and rotamers for the quantum mechanically-seeded (QMS) method are shown in blue. Experimental values shown as black circles.



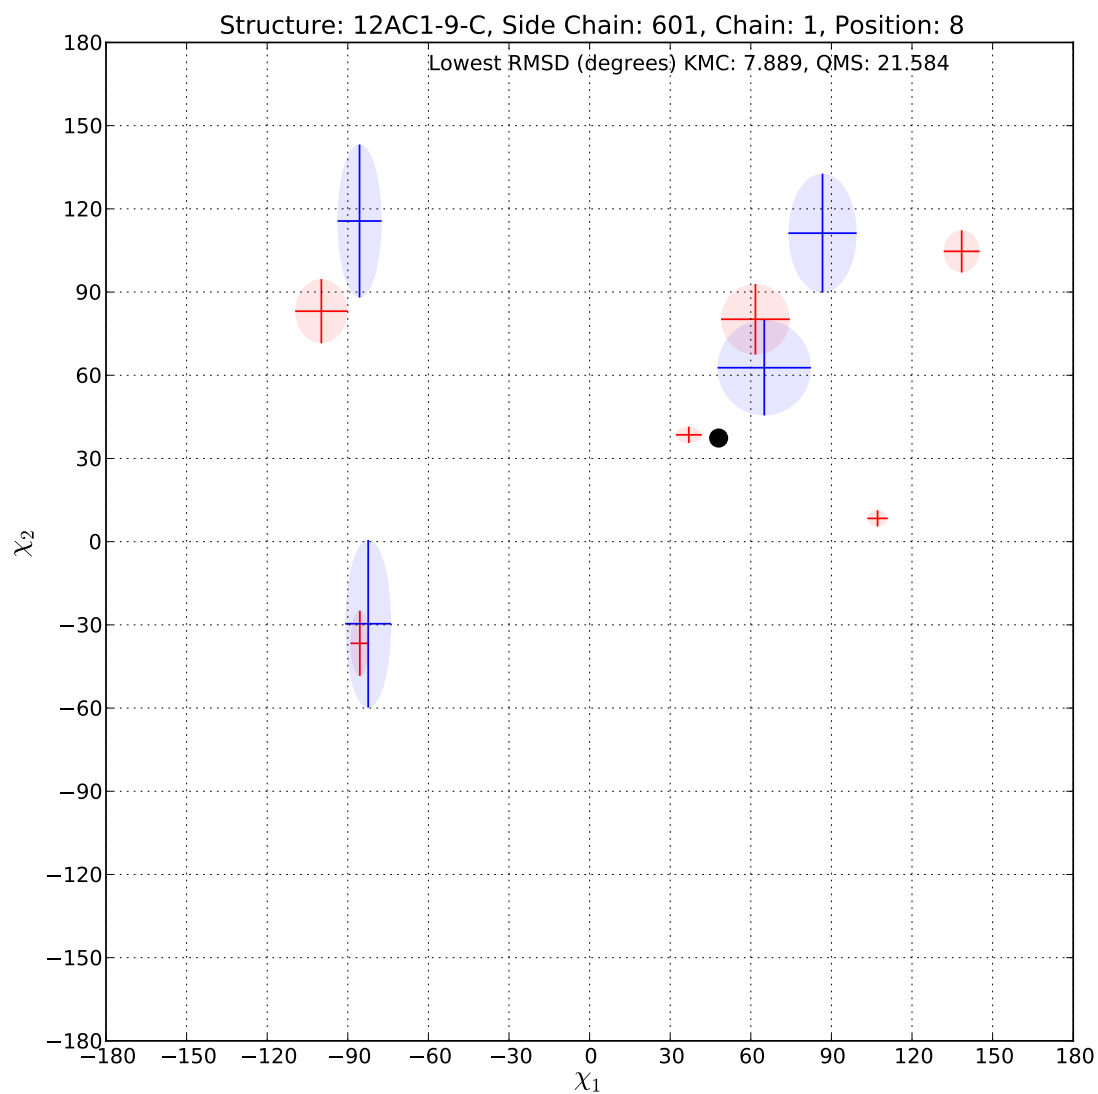

Figure S103: The rotamer library coverage plot for residue number 8 in chain 1 of peptoid databank structure 12AC1-9-C. Interpolated rotamers from the k-means clustering (KMC) method are shown as red ellipses and rotamers for the quantum mechanically-seeded (QMS) method are shown in blue. Experimental values shown as black circles.

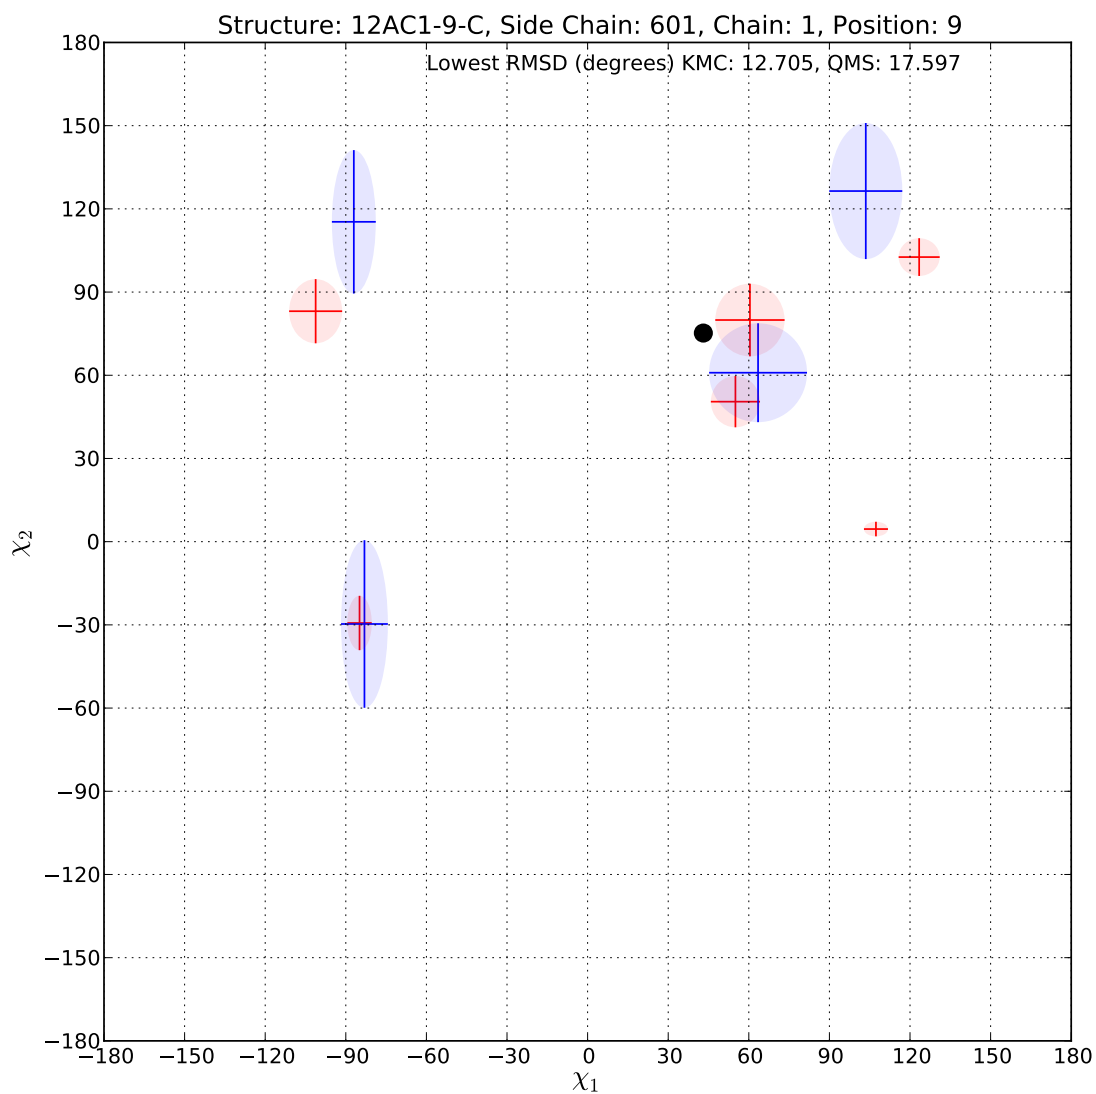

Figure S104: The rotamer library coverage plot for residue number 9 in chain 1 of peptoid databank structure 12AC1-9-C. Interpolated rotamers from the k-means clustering (KMC) method are shown as red ellipses and rotamers for the quantum mechanically-seeded (QMS) method are shown in blue. Experimental values shown as black circles.

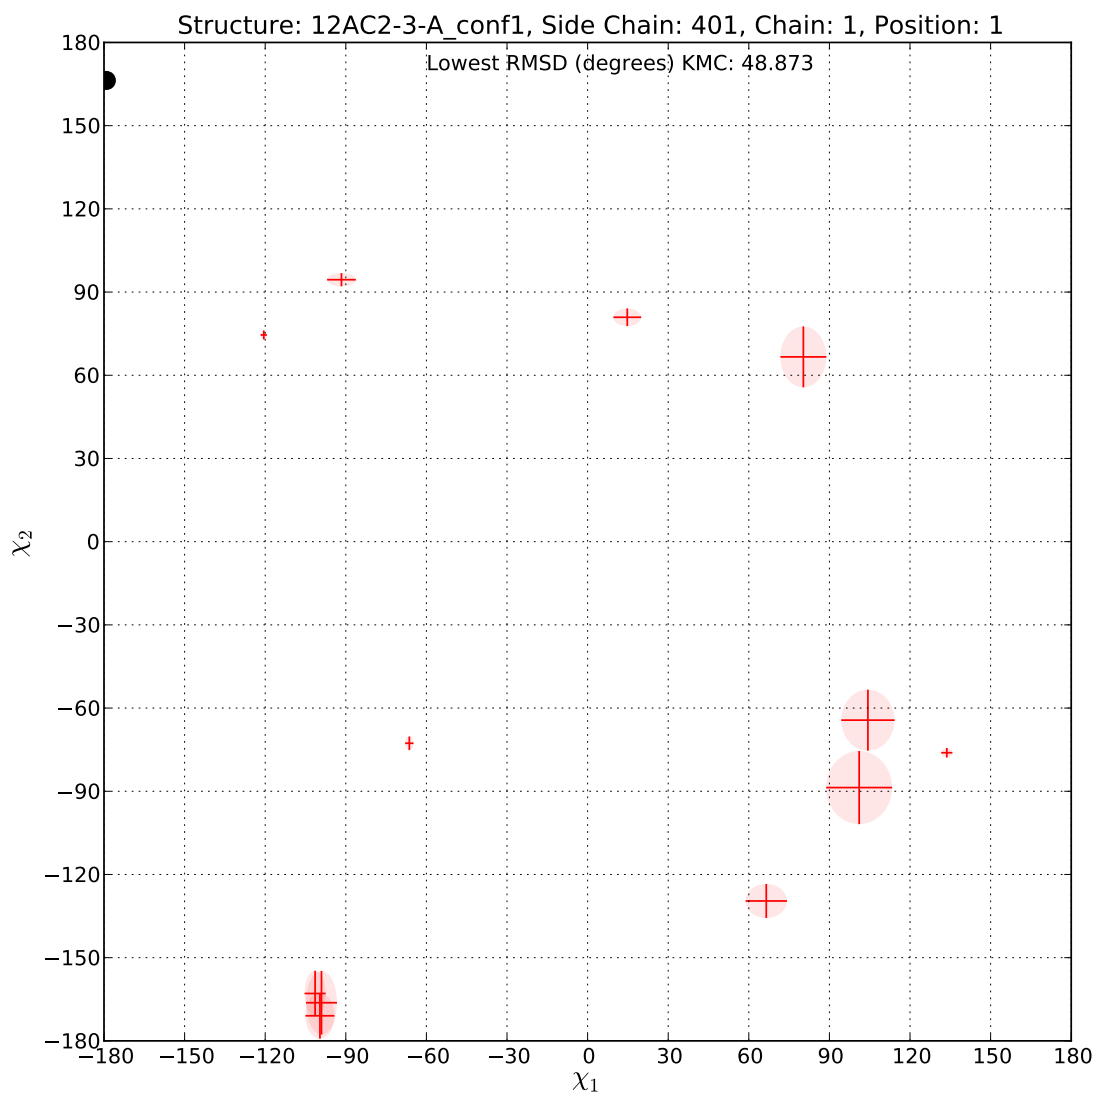

Figure S105: The rotamer library coverage plot for residue number 1 in chain 1 of peptoid databank structure 12AC2-3-A.conf1. Interpolated rotamers from the k-means clustering (KMC) method are shown as red ellipses and rotamers for the quantum mechanically-seeded (QMS) method are shown in blue. Experimental values shown as black circles.

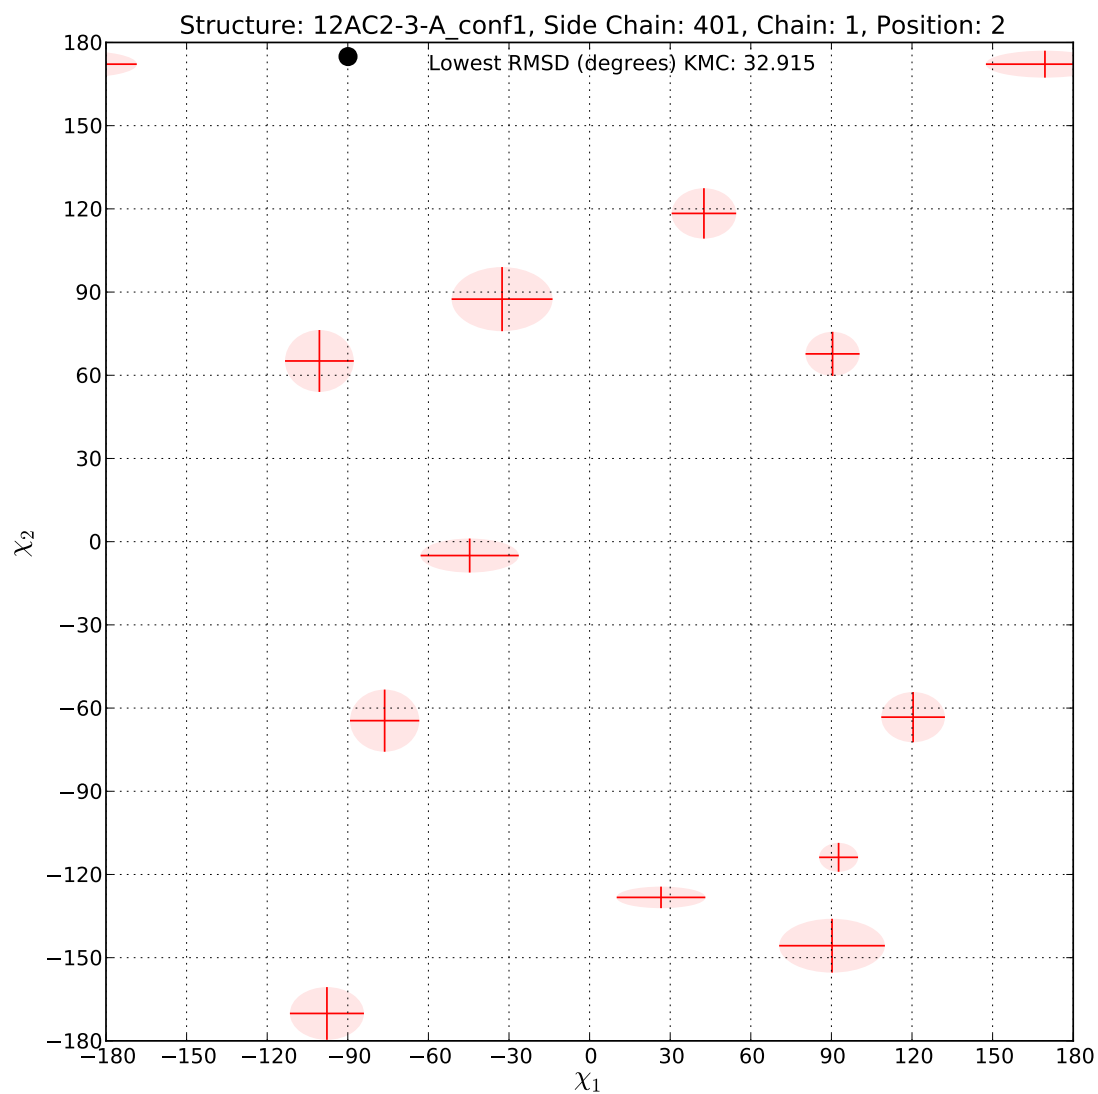

Figure S106: The rotamer library coverage plot for residue number 2 in chain 1 of peptoid databank structure 12AC2-3-A.conf1. Interpolated rotamers from the k-means clustering (KMC) method are shown as red ellipses and rotamers for the quantum mechanically-seeded (QMS) method are shown in blue. Experimental values shown as black circles.

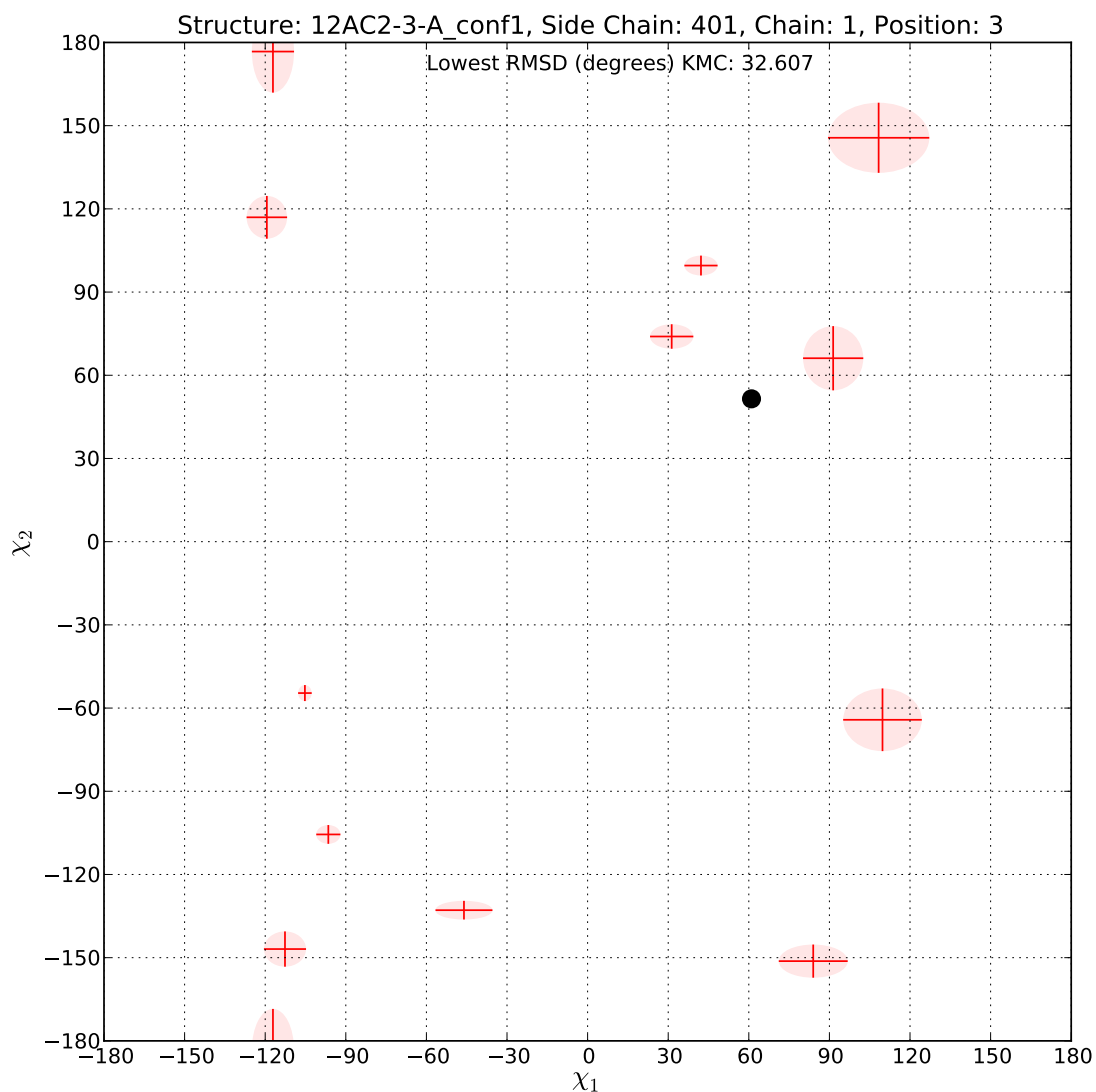

Figure S107: The rotamer library coverage plot for residue number 3 in chain 1 of peptoid databank structure 12AC2-3-A.conf1. Interpolated rotamers from the k-means clustering (KMC) method are shown as red ellipses and rotamers for the quantum mechanically-seeded (QMS) method are shown in blue. Experimental values shown as black circles.

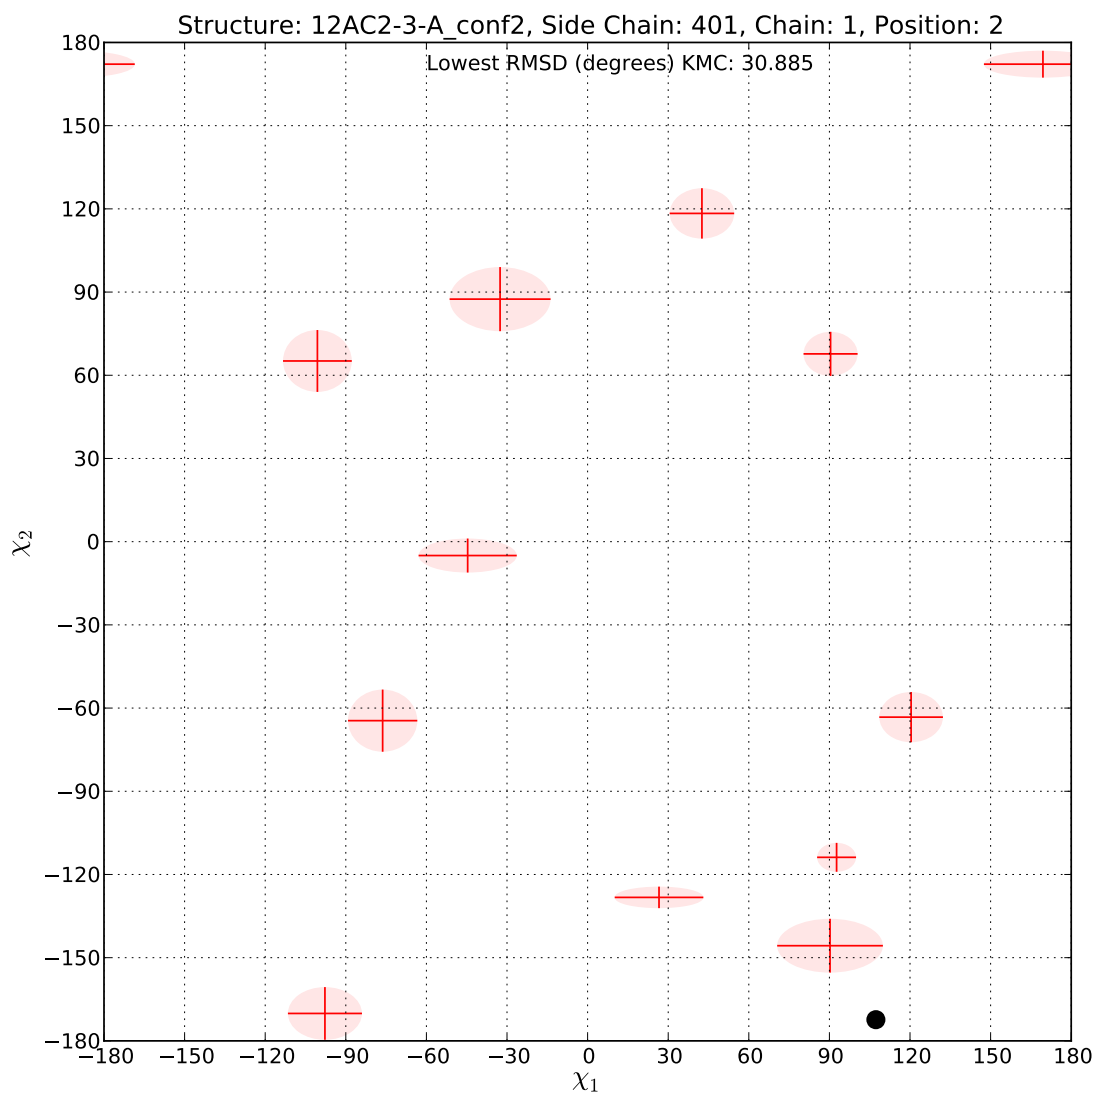

Figure S108: The rotamer library coverage plot for residue number 2 in chain 1 of peptoid databank structure 12AC2-3-A.conf2. Interpolated rotamers from the k-means clustering (KMC) method are shown as red ellipses and rotamers for the quantum mechanically-seeded (QMS) method are shown in blue. Experimental values shown as black circles.
